# Supplementary material for: Theoretical Study on the Copper-Catalyzed ortho-Selective C-H Functionalization of Naphthols with α-Phenyl-α-Diazoesters
Source: MDPI journal article supplement (doi:10.3390/molecules28041767), 2023-02-13
Supplement: s1 [file s1]

# Theoretical study on the copper-catalyzed *ortho*-selective C-H functionalization of naphthols with $\alpha$ -phenyl- $\alpha$ -diazoesters

Xiaoli Zhu,<sup>a</sup> Xun-Shen Liu,<sup>a</sup> Fei Xia<sup>a,c,\*</sup> and Lu Liu<sup>a,b,\*</sup>

*a* School of Chemistry and Molecular Engineering, East China Normal University, 500 Dongchuan Road Shanghai, 200241, P. R. China

E-mail: [lliu@chem.ecnu.edu.cn](mailto:lliu@chem.ecnu.edu.cn), [fxia@chem.ecnu.edu.cn](mailto:fxia@chem.ecnu.edu.cn)

*b* Shanghai Engineering Research Center of Molecular Therapeutics and New Drug Development, East China Normal University, Shanghai 200062, P. R. China

*c* NYU-ECNU Center for Computational Chemistry at New York University, East China Normal University, 3663 zhongshan Road, Shanghai 200062, P. R. China

## Table of Contents

|                                                                              |   |
|------------------------------------------------------------------------------|---|
| 1. Experimental reactivity of 1-methoxynaphthalene catalyzed by Cu catalysts | 2 |
| 2. Computational methods                                                     | 3 |
| 3. The formation of three Cu carbenes                                        | 4 |
| 4. References                                                                | 5 |
| 5. Cartesian Coordinate of Optimized Structure                               | 6 |

## 1. Experimental reactivity of 1-methoxynaphthalene catalyzed by Cu catalysts

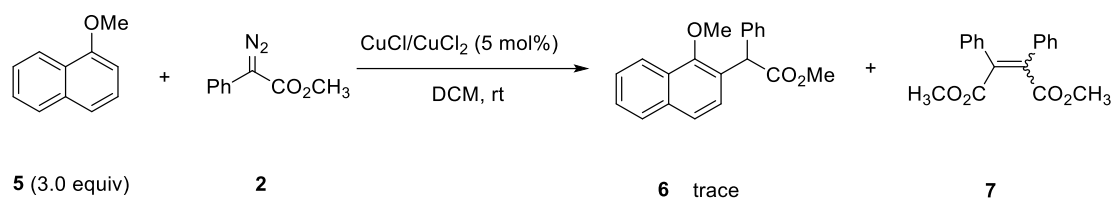

**Scheme S1** C(sp<sup>2</sup>)-H bond functionalization of 1-methoxynaphthalene with  $\alpha$ -diazoesters catalyzed by CuCl or CuCl<sub>2</sub>

In a dried glass tube, copper catalyst (0.02 mmol, 5 mol%), 1-methoxynaphthalene **5** (189.6 mg, 1.2 mmol, 3 equiv) and DCM (1 mL) was added at room temperature. Then a solution of **2** (76.2 mg, 0.4 mmol) dissolved in 1 mL DCM was introduced into the reaction mixture by a syringe. The resulting mixture was continually stirred at room temperature until **6** was consumed completely determined by TLC analysis. After being filtrated through celite and concentrated, the residue was purified by column chromatography on silica gel to afford the desired product. The yield was determined by <sup>1</sup>H-NMR of crude product, using CH<sub>2</sub>Br<sub>2</sub> as internal standard.

The reaction of 1-methoxynaphthalene **5** with the diazoester **2** in standard condition only delivered a trace amount of *ortho*-selective C-H bond functionalization products **6**. This result indicated that the hydroxyl was vital not only for site-selectivity but also for reactivity.<sup>1</sup>

## 2. Computational methods

All DFT calculations are performed using the Gaussian09 program package.<sup>2</sup> The geometric structures of intermediates and transition states are directly optimized in the solution phase by using the  $\omega$ B97XD functional.<sup>3</sup> The SDD basis set<sup>4</sup> combined with the effective core potential is used to describe the metal element Cu, and the large 6-31+G\*\* basis set<sup>5</sup> is utilized to describe the nonmetallic elements C, H, O, N and Cl. Frequency analyses are also performed at the same computational level to confirm that the intermediates are local minima and the transition states have only one imaginary frequency. The intrinsic reaction coordinate (IRC)<sup>6</sup> calculations are performed to make sure that all transition state structures connect the correct reactants and products in the forward and backward reaction directions. The solvent effect of dichloromethane is evaluated using the SMD<sup>7</sup> model with a dielectric constant  $\epsilon = 8.93$  in Gaussian09. All the calculated energies refer to the Gibbs free energies in the units of kcal mol<sup>-1</sup> at the temperature of 298.15 K. More structure details about the intermediates and transition states are provided in Supporting Information.

### 3. The formation of three Cu carbenes

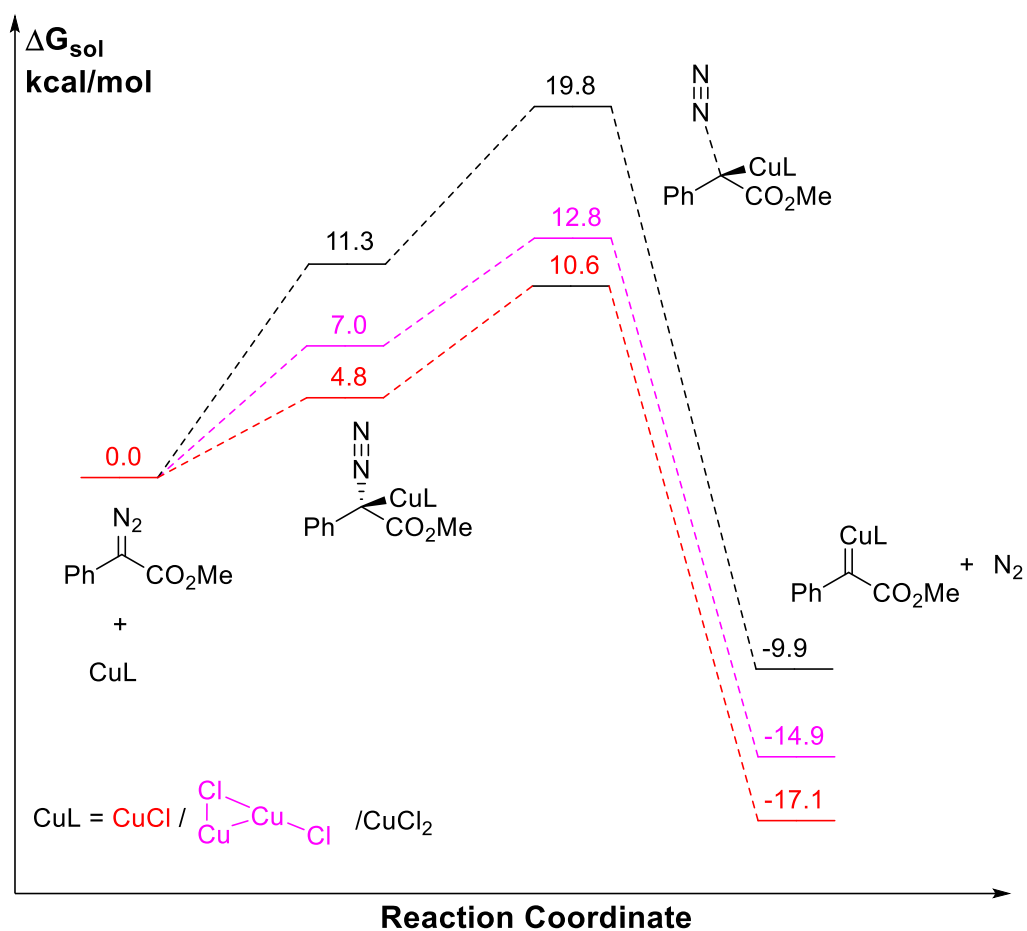

**Figure S1** Calculated reaction pathways of diazoacetates and copper catalyst CuCl monomer, the (CuCl)<sub>2</sub> dimer and CuCl<sub>2</sub> monomer. Denoted by the red, pink and black lines respectively, to generate the products N<sub>2</sub> and Cu carbenes

## 4. References

- 1 B. Ma, Z. Tang, J. Zhang and L. Liu, Copper-catalysed *ortho*-selective C-H bond functionalization of phenols and naphthols with  $\alpha$ -aryl- $\alpha$ -diazoesters, *Chem. Commun.*, 2020, **56**, 9485-9488.
- 2 M. J. Frisch, G. W. Trucks, H. B. Schlegel, G. E. Scuseria, M. A. Robb, J. R. Cheeseman, G. Scalmani, V. Barone, B. Mennucci, G. A. Petersson, H. Nakatsuji, M. Caricato, X. Li, H. P. Hratchian, A. F. Izmaylov, J. Bloino, G. Zheng, J. L. Sonnenberg, M. Hada, M. Ehara, K. Toyota, R. Fukuda, J. Hasegawa, M. Ishida, T. Nakajima, Y. Honda, O. Kitao, H. Nakai, T. Vreven, J. A. Montgomery, Jr., J. E. Peralta, F. Ogliaro, M. Bearpark, J. J. Heyd, E. Brothers, K. N. Kudin, V. N. Staroverov, T. Keith, R. Kobayashi, J. Normand, K. Raghavachari, A. Rendell, J. C. Burant, S. S. Iyengar, J. Tomasi, M. Cossi, N. Rega, J. M. Millam, M. Klene, J. E. Knox, J. B. Cross, V. Bakken, C. Adamo, J. Jaramillo, R. Gomperts, R. E. Stratmann, O. Yazyev, A. J. Austin, R. Cammi, C. Pomelli, J. W. Ochterski, R. L. Martin, K. Morokuma, V. G. Zakrzewski, G. A. Voth, P. Salvador, J. J. Dannenberg, S. Dapprich, A. D. Daniels, O. Farkas, J. B. Foresman, J. V. Ortiz, J. Cioslowski, and D. J. Fox, *Gaussian 09, Revision B.01*, Gaussian, Inc., Wallingford CT, 2010.
- 3 (a) L. A. Burns, A. Vazquez-Mayagoitia, B. G. Sumpter and C. D. Sherrill, Density-functional approaches to noncovalent interactions: a comparison of dispersion corrections (DFT-D), exchange-hole dipole moment (XDM) theory, and specialized functionals, *J. Chem. Phys.*, 2011, **134**, 084107; (b) J. D. Chai and M. Head-Gordon, Long-range corrected hybrid density functionals with damped atom-atom dispersion corrections, *Phys. Chem. Chem. Phys.*, 2008, **10**, 6615-6620.
- 4 M. Dolg, U. Wedig, H. Stoll and H. Preuss, Energy-adjusted ab initio pseudopotentials for the first row transition elements, *J. Chem. Phys.*, 1987, **86**, 866-872.
- 5 W. J. Hehre, R. Ditchfield and J. A. Pople, Self-Consistent Molecular Orbital Methods. XII. Further Extensions of Gaussian-Type Basis Sets for Use in Molecular Orbital Studies of Organic Molecules, *J. Chem. Phys.*, 1972, **56**, 2257-2261.
- 6 (a) K. Fukui, The path of chemical reactions-the IRC approach, *Acc. Chem. Res.*, 1981, **14**, 363-368; (b) K. Fukui, A Formulation of the reaction coordinate, *J. Phys. Chem.*, 1970, **74**, 4161-4163.
- 7 V. Marenich, C. J. Cramer and D. G. Truhlar, Universal solvation model based on solute electron density and on a continuum model of the solvent defined by the bulk dielectric constant and atomic surface tensions, *J. Phys. Chem. B*, 2009, **113**, 6378-6396.

## 5. Cartesian Coordinate of Optimized Structure

Structure and coordinates of 1-naphthol.log

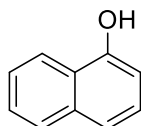

|   |             |             |             |
|---|-------------|-------------|-------------|
| C | 2.36843800  | -1.07038100 | 0.00001500  |
| C | 1.04261200  | -1.43036800 | 0.00001000  |
| C | 0.02765900  | -0.43713600 | -0.00001000 |
| C | 0.39252400  | 0.93938600  | -0.00001200 |
| C | 1.77454500  | 1.27465800  | -0.00001000 |
| C | 2.73819500  | 0.29662400  | 0.00000200  |
| H | 3.13875500  | -1.83551800 | 0.00003300  |
| H | 0.75873400  | -2.47726200 | 0.00002200  |
| C | -1.36077200 | -0.77068700 | -0.00001200 |
| C | -0.62029500 | 1.93792300  | 0.00000100  |
| H | 2.05415200  | 2.32484400  | -0.00001700 |
| H | 3.78986700  | 0.56740700  | 0.00000800  |
| C | -1.94321600 | 1.57444400  | 0.00001700  |
| C | -2.32356600 | 0.21138000  | 0.00000000  |
| H | -0.33102800 | 2.98487000  | 0.00000200  |
| H | -2.71840400 | 2.33480300  | 0.00003100  |
| H | -3.37603000 | -0.05973700 | -0.00000200 |
| O | -1.65940200 | -2.09687500 | -0.00004200 |
| H | -2.61757200 | -2.21947400 | 0.00025600  |

Structure and coordinates of React-biCuCl.log

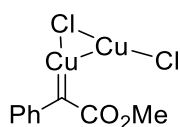

|   |             |             |             |
|---|-------------|-------------|-------------|
| C | -2.63109900 | -2.95933400 | -0.70109700 |
| C | -1.76322700 | -1.88323200 | -0.70230400 |
| C | -2.11377400 | -0.66813000 | -0.05196000 |
| C | -3.37262600 | -0.58253000 | 0.60829900  |
| C | -4.23076000 | -1.66462700 | 0.61196900  |
| C | -3.86047100 | -2.84653200 | -0.04384500 |
| H | -2.36381500 | -3.88293900 | -1.20279900 |
| H | -0.80153700 | -1.94067400 | -1.20418500 |
| H | -3.65884300 | 0.33253200  | 1.11848600  |
| H | -5.18873600 | -1.60192600 | 1.11642100  |

|    |             |             |             |
|----|-------------|-------------|-------------|
| H  | -4.54356300 | -3.69093400 | -0.04082800 |
| C  | -1.57437900 | 1.67469900  | 0.57419400  |
| O  | -1.29281500 | 1.87450600  | 1.74048800  |
| O  | -2.16143000 | 2.54111400  | -0.24028500 |
| C  | -2.47556600 | 3.83711800  | 0.30677900  |
| H  | -2.89446600 | 4.40264300  | -0.52364500 |
| H  | -3.20974100 | 3.74054300  | 1.10939700  |
| H  | -1.56964200 | 4.31844400  | 0.67961600  |
| C  | -1.20553400 | 0.41414200  | -0.10917500 |
| Cu | 0.48683300  | 0.39843600  | -0.90750900 |
| Cl | 2.46611300  | 0.30135500  | -1.91582400 |
| Cu | 2.82338600  | -0.33337300 | 0.17727200  |
| Cl | 3.13580300  | -0.93776300 | 2.21968600  |

Structure and coordinates of 1-TS-o1.log

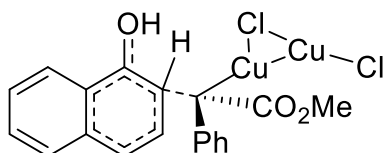

|    |             |             |             |
|----|-------------|-------------|-------------|
| C  | -2.86077900 | 0.60397600  | -2.32424700 |
| C  | -1.62787800 | 0.51152000  | -1.69719100 |
| C  | -1.35196400 | 1.24481600  | -0.52180600 |
| C  | -2.37645800 | 2.05715600  | 0.01137300  |
| C  | -3.60872300 | 2.15660200  | -0.62164300 |
| C  | -3.85387900 | 1.42720400  | -1.78541100 |
| H  | -3.05482400 | 0.03608200  | -3.22855500 |
| H  | -0.85316400 | -0.13126700 | -2.10701700 |
| H  | -2.19662600 | 2.61891800  | 0.92229800  |
| H  | -4.38228500 | 2.79315100  | -0.20362300 |
| H  | -4.81975000 | 1.50146500  | -2.27627600 |
| C  | 0.38110600  | 2.21062900  | 1.04692300  |
| O  | 0.83120800  | 2.09045200  | 2.17052100  |
| O  | 0.33061000  | 3.39140900  | 0.40806500  |
| C  | 0.93059800  | 4.50669600  | 1.08241800  |
| H  | 0.80252400  | 5.35291000  | 0.40852300  |
| H  | 0.42682600  | 4.69814700  | 2.03245000  |
| H  | 1.99269100  | 4.31943600  | 1.25816700  |
| C  | -0.04594100 | 1.13230700  | 0.09793600  |
| Cu | 1.52088800  | 0.60027500  | -0.87119800 |
| Cl | 3.41786800  | 0.28706900  | -2.02057100 |
| Cu | 3.46756700  | -1.02495800 | -0.23487200 |
| Cl | 3.13471000  | -2.24035800 | 1.52981200  |
| C  | -2.30054400 | -2.71623000 | -0.62282100 |
| C  | -1.98790100 | -1.80120100 | 0.41111200  |

|   |             |             |             |
|---|-------------|-------------|-------------|
| C | -3.60823600 | -2.90109800 | -1.01035000 |
| C | -0.63920500 | -1.54555200 | 0.79789200  |
| C | -3.02666700 | -1.08698800 | 1.06862200  |
| C | -4.64190700 | -2.18760800 | -0.36741300 |
| H | -3.84742700 | -3.59419300 | -1.81054000 |
| C | -0.34360900 | -0.49936900 | 1.68983800  |
| C | -2.70910300 | -0.17704800 | 2.13239500  |
| C | -4.35872000 | -1.30519300 | 0.65418400  |
| H | -5.67137600 | -2.33988100 | -0.67779600 |
| C | -1.41244700 | 0.08409900  | 2.44409900  |
| H | 0.67500000  | -0.38618400 | 2.04363100  |
| H | -3.52272000 | 0.30176800  | 2.66858800  |
| H | -5.15904100 | -0.76291700 | 1.14954900  |
| H | -1.15709500 | 0.78831800  | 3.22722800  |
| H | -1.49749300 | -3.25496600 | -1.11423900 |
| O | 0.29853800  | -2.29889500 | 0.24003100  |
| H | 1.17643300  | -2.17110900 | 0.66211600  |

Structure and coordinates of 1-TS-p1.log

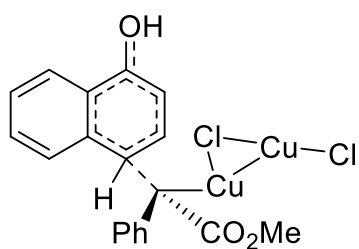

|   |             |             |             |
|---|-------------|-------------|-------------|
| C | 0.64818800  | -1.71523500 | 2.36791400  |
| C | 0.12523300  | -0.78030700 | 1.47898700  |
| C | 0.86976500  | 0.35065300  | 1.08960200  |
| C | 2.16775400  | 0.51188500  | 1.63054700  |
| C | 2.68294400  | -0.41296500 | 2.52175800  |
| C | 1.92796600  | -1.53640100 | 2.88466000  |
| H | 0.05574900  | -2.57995700 | 2.65045200  |
| H | -0.87667900 | -0.91250300 | 1.08251800  |
| H | 2.76998600  | 1.36846500  | 1.34440600  |
| H | 3.67863300  | -0.27396800 | 2.93149200  |
| H | 2.34014100  | -2.26401300 | 3.57762600  |
| C | 0.95169600  | 2.61637200  | -0.02850000 |
| O | 1.36823000  | 3.15385300  | -1.03912600 |
| O | 0.90155300  | 3.24735900  | 1.15613300  |
| C | 1.31256700  | 4.62123800  | 1.16848600  |
| H | 1.20377000  | 4.94505100  | 2.20303600  |
| H | 2.35330000  | 4.71569300  | 0.85034100  |
| H | 0.67117500  | 5.21985400  | 0.51697200  |



|    |             |             |             |
|----|-------------|-------------|-------------|
| C  | 0.30838500  | 1.27545300  | 0.12108100  |
| Cu | -1.57248800 | 1.40515200  | -0.23302000 |
| Cl | -3.75653800 | 1.45392900  | -0.61397600 |
| Cu | -3.46007600 | -0.64728000 | 0.02026600  |
| Cl | -3.17103600 | -2.70383100 | 0.61732700  |
| C  | 3.58058800  | -2.14746600 | -0.58061000 |
| C  | 2.36130400  | -1.58000700 | -1.01384200 |
| C  | 4.73249300  | -1.39074700 | -0.58911900 |
| C  | 1.14321800  | -2.33912200 | -1.03282500 |
| C  | 2.31727200  | -0.23078400 | -1.44570300 |
| C  | 4.69592800  | -0.05054200 | -1.02292000 |
| H  | 5.66981600  | -1.82616100 | -0.25766600 |
| C  | -0.03739200 | -1.80796600 | -1.54495700 |
| C  | 1.05591300  | 0.35419700  | -1.81101000 |
| C  | 3.51073800  | 0.52068000  | -1.44057100 |
| H  | 5.60946000  | 0.53662200  | -1.02747100 |
| C  | -0.06074000 | -0.48381200 | -1.95792100 |
| H  | -0.93231400 | -2.42122700 | -1.59089800 |
| H  | 1.05429500  | 1.33158500  | -2.27813300 |
| H  | 3.47879500  | 1.55719100  | -1.76242400 |
| H  | -0.97840900 | -0.07076400 | -2.36715500 |
| H  | 3.60239300  | -3.17864800 | -0.24539300 |
| O  | 1.21795600  | -3.59010000 | -0.57742600 |
| H  | 0.34816300  | -4.01680000 | -0.60179000 |

Structure and coordinates of 1-Int-p2.log

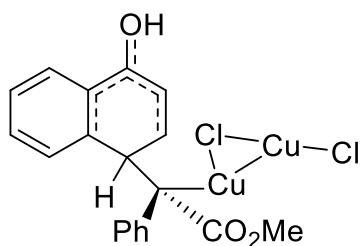

|   |             |             |            |
|---|-------------|-------------|------------|
| C | 0.33309500  | -1.46957300 | 2.67072600 |
| C | -0.02538400 | -0.71195800 | 1.55587500 |
| C | 0.75288000  | 0.36610100  | 1.11645600 |
| C | 1.91471100  | 0.66351700  | 1.84859800 |
| C | 2.27449000  | -0.08105000 | 2.96895800 |
| C | 1.48793200  | -1.15743300 | 3.38383800 |
| H | -0.29928800 | -2.29728300 | 2.98006200 |
| H | -0.93267800 | -0.96575500 | 1.01434900 |
| H | 2.55135400  | 1.48578000  | 1.53645200 |
| H | 3.17825200  | 0.17496300  | 3.51527000 |
| H | 1.77081400  | -1.74031200 | 4.25572900 |

|    |             |             |             |
|----|-------------|-------------|-------------|
| C  | 0.78213300  | 2.51724500  | -0.25746500 |
| O  | 1.13900600  | 3.11535700  | -1.26994100 |
| O  | 0.62923400  | 3.16620700  | 0.91612100  |
| C  | 0.88809700  | 4.57001300  | 0.90747000  |
| H  | 0.69262200  | 4.90835000  | 1.92536000  |
| H  | 1.92908800  | 4.77306700  | 0.64177400  |
| H  | 0.22511400  | 5.08592600  | 0.20801200  |
| C  | 0.41520200  | 1.08684900  | -0.17425900 |
| Cu | -1.55751300 | 1.29249600  | -0.38162300 |
| Cl | -3.76669100 | 1.39274200  | -0.61281400 |
| Cu | -3.46118200 | -0.72062500 | -0.03269500 |
| Cl | -3.17626800 | -2.80986300 | 0.41988200  |
| C  | 3.99899000  | -1.92988500 | -0.59865700 |
| C  | 2.69480400  | -1.51082800 | -0.93419000 |
| C  | 5.02209200  | -1.00411400 | -0.55019500 |
| C  | 1.62341200  | -2.46184000 | -1.05642300 |
| C  | 2.41515500  | -0.15382600 | -1.19971700 |
| C  | 4.75498300  | 0.34047700  | -0.84566900 |
| H  | 6.02946000  | -1.31688000 | -0.29682100 |
| C  | 0.34058800  | -2.09920800 | -1.53920900 |
| C  | 1.00586100  | 0.30651500  | -1.42716100 |
| C  | 3.47057600  | 0.76052100  | -1.16254600 |
| H  | 5.56239300  | 1.06619200  | -0.82304200 |
| C  | 0.06751100  | -0.78672400 | -1.74413700 |
| H  | -0.40647500 | -2.86930200 | -1.70336900 |
| H  | 0.98163700  | 1.04364400  | -2.23996700 |
| H  | 3.27264000  | 1.80649600  | -1.37130600 |
| H  | -0.92011300 | -0.49941900 | -2.09684300 |
| H  | 4.19379200  | -2.97670400 | -0.39320800 |
| O  | 1.89627200  | -3.70130400 | -0.74264400 |
| H  | 1.12495000  | -4.28283100 | -0.85942500 |

Structure and coordinates of 1-Int-o2.log

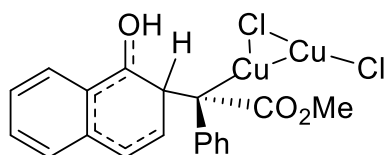

|   |             |            |             |
|---|-------------|------------|-------------|
| C | -2.55268600 | 1.04992100 | -2.46472000 |
| C | -1.43125200 | 0.74728500 | -1.69392100 |
| C | -1.21234200 | 1.35163000 | -0.44781200 |
| C | -2.15961300 | 2.28782900 | -0.00732600 |
| C | -3.27571100 | 2.60704400 | -0.77718100 |
| C | -3.48182200 | 1.98275400 | -2.00760300 |
| H | -2.69526500 | 0.55926900 | -3.42331200 |

|    |             |             |             |
|----|-------------|-------------|-------------|
| H  | -0.70869300 | 0.02157600  | -2.06295500 |
| H  | -2.02390800 | 2.77473100  | 0.95375300  |
| H  | -3.99040100 | 3.33865300  | -0.41063500 |
| H  | -4.35589800 | 2.22530200  | -2.60518300 |
| C  | 0.59364800  | 1.99781700  | 1.23114800  |
| O  | 1.11160500  | 1.84520600  | 2.33294200  |
| O  | 0.60627300  | 3.19634100  | 0.60988600  |
| C  | 1.28767100  | 4.25415200  | 1.28517800  |
| H  | 1.17866100  | 5.12774500  | 0.64229400  |
| H  | 0.83526000  | 4.44897500  | 2.26093200  |
| H  | 2.34673700  | 4.01612500  | 1.41599000  |
| C  | -0.03675900 | 0.93212300  | 0.41438400  |
| Cu | 1.53696200  | 0.57911800  | -0.75077100 |
| Cl | 3.31854700  | 0.17706500  | -2.05117900 |
| Cu | 3.35005500  | -1.15600300 | -0.28035800 |
| Cl | 2.89782100  | -2.42332400 | 1.42365000  |
| C  | -2.49034300 | -2.67548800 | -0.69137300 |
| C  | -2.15031300 | -1.74711400 | 0.31685200  |
| C  | -3.81659200 | -2.89899900 | -0.99622400 |
| C  | -0.79011800 | -1.45918600 | 0.62736600  |
| C  | -3.15880100 | -1.06760100 | 1.05031800  |
| C  | -4.81782700 | -2.21936600 | -0.28190300 |
| H  | -4.08758100 | -3.59514900 | -1.78240700 |
| C  | -0.42039100 | -0.26651300 | 1.42110400  |
| C  | -2.79688100 | -0.15813800 | 2.12613800  |
| C  | -4.49753300 | -1.32744000 | 0.73065400  |
| H  | -5.86124500 | -2.40032400 | -0.52161900 |
| C  | -1.51857800 | 0.19030000  | 2.32518700  |
| H  | 0.49328900  | -0.46751900 | 1.98888000  |
| H  | -3.59477800 | 0.24558200  | 2.74187300  |
| H  | -5.28322200 | -0.82085900 | 1.28245700  |
| H  | -1.23957800 | 0.90099600  | 3.09530900  |
| H  | -1.70427600 | -3.18480900 | -1.23834900 |
| O  | 0.10990800  | -2.25006900 | 0.15243800  |
| H  | 1.02432100  | -2.09207900 | 0.50997100  |

Structure and coordinates of 1-TS-p3.log

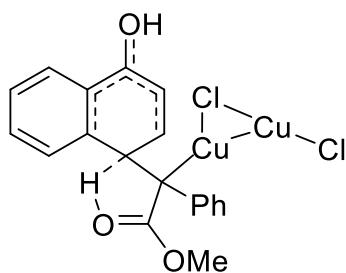

|    |             |             |             |
|----|-------------|-------------|-------------|
| C  | -2.26960900 | 2.88605100  | -2.06416100 |
| C  | -1.65910200 | 1.78208700  | -1.47702300 |
| C  | -0.93125600 | 1.89487300  | -0.27756600 |
| C  | -0.84126600 | 3.17152400  | 0.30556500  |
| C  | -1.45458500 | 4.27531000  | -0.28540800 |
| C  | -2.17300800 | 4.14534600  | -1.47233300 |
| H  | -2.82169500 | 2.75824500  | -2.99113700 |
| H  | -1.74970600 | 0.81364700  | -1.96163900 |
| H  | -0.28934900 | 3.30821900  | 1.22691200  |
| H  | -1.36631500 | 5.24643300  | 0.19407400  |
| H  | -2.64787200 | 5.00869000  | -1.92851900 |
| C  | 0.19897800  | 0.55586600  | 1.65946700  |
| O  | 0.20161700  | -0.58017500 | 2.20762700  |
| O  | 0.66419100  | 1.61549600  | 2.29825900  |
| C  | 1.28029200  | 1.39436900  | 3.57875200  |
| H  | 1.63353000  | 2.37385900  | 3.89850000  |
| H  | 0.55147600  | 1.00321700  | 4.29136500  |
| H  | 2.11864400  | 0.70169500  | 3.47937700  |
| C  | -0.29963200 | 0.66270500  | 0.29754600  |
| Cu | 1.50797600  | 0.77755000  | -0.57355700 |
| Cl | 3.47271900  | 0.94310400  | -1.59010000 |
| Cu | 3.51251600  | -0.87061700 | -0.30447900 |
| Cl | 3.56608400  | -2.64241000 | 0.92966700  |
| H  | -0.46157800 | -1.14446600 | 1.08567300  |
| C  | -1.01211700 | -0.67397900 | 0.03458500  |
| C  | -2.44007100 | -0.79542700 | 0.37404300  |
| C  | -0.51882400 | -1.57004000 | -0.95582500 |
| C  | -3.06291800 | 0.07619200  | 1.29125300  |
| C  | -3.21622400 | -1.84371200 | -0.17856800 |
| C  | -1.26491400 | -2.59981000 | -1.49154600 |
| H  | 0.51924200  | -1.46021800 | -1.26227800 |
| C  | -4.38985600 | -0.08603200 | 1.63060000  |
| H  | -2.49854900 | 0.89194200  | 1.72929900  |
| C  | -4.57612900 | -2.00059000 | 0.18297900  |
| C  | -2.60036500 | -2.73697800 | -1.11491100 |
| H  | -0.82644400 | -3.29310800 | -2.20237400 |
| C  | -5.15557800 | -1.13050600 | 1.07665100  |
| H  | -4.84872500 | 0.60238100  | 2.33364800  |
| H  | -5.15057500 | -2.81306100 | -0.24780600 |
| H  | -6.19778000 | -1.24764200 | 1.35484700  |
| O  | -3.36870900 | -3.70326800 | -1.60218600 |
| H  | -2.87791800 | -4.26262000 | -2.22376700 |

Structure and coordinates of 1-TS-o3.log

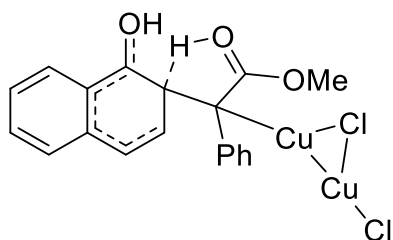

|    |             |             |             |
|----|-------------|-------------|-------------|
| C  | -0.53422400 | 3.95151200  | -1.65335100 |
| C  | -0.59410700 | 2.68677500  | -1.07820800 |
| C  | 0.25478700  | 2.32310000  | -0.01378900 |
| C  | 1.17300200  | 3.28532400  | 0.44201100  |
| C  | 1.23149100  | 4.55103400  | -0.14083800 |
| C  | 0.38169100  | 4.89646600  | -1.18893200 |
| H  | -1.20656700 | 4.19799300  | -2.47025600 |
| H  | -1.31159000 | 1.96561200  | -1.46145700 |
| H  | 1.85244800  | 3.04719500  | 1.25064300  |
| H  | 1.95222500  | 5.27202700  | 0.23495700  |
| H  | 0.43315800  | 5.88271300  | -1.63986800 |
| C  | 0.74971600  | 0.53647500  | 1.82201600  |
| O  | 0.14622400  | -0.29311700 | 2.54721700  |
| O  | 1.92382400  | 1.01725100  | 2.17546100  |
| C  | 2.52588400  | 0.48733200  | 3.37187300  |
| H  | 3.47757400  | 1.00843900  | 3.46431300  |
| H  | 1.89325700  | 0.69078100  | 4.23765000  |
| H  | 2.68803300  | -0.58677900 | 3.26293400  |
| C  | 0.13228900  | 0.93105600  | 0.55230300  |
| Cu | 1.49331900  | 0.26615800  | -0.77170000 |
| Cl | 3.13459000  | -0.58261400 | -2.03891900 |
| Cu | 2.45591900  | -2.09256600 | -0.56519300 |
| Cl | 1.81268900  | -3.55655800 | 0.87216900  |
| C  | -3.69731500 | -2.07944000 | -0.90475800 |
| C  | -3.21605700 | -0.94196500 | -0.21471200 |
| C  | -5.05278300 | -2.29907900 | -1.00913900 |
| C  | -1.80946800 | -0.68182400 | -0.11339500 |
| C  | -4.12578000 | -0.02346700 | 0.36947100  |
| C  | -5.96062300 | -1.38925300 | -0.43113600 |
| H  | -5.42367300 | -3.17432000 | -1.53220600 |
| C  | -1.30927200 | 0.40723400  | 0.66539000  |
| C  | -3.63456800 | 1.13222500  | 1.07286100  |
| C  | -5.50814000 | -0.27480600 | 0.24543700  |
| H  | -7.02772800 | -1.56935400 | -0.51962200 |
| C  | -2.30749700 | 1.34461300  | 1.19089000  |
| H  | -0.99231000 | -0.24995100 | 1.71185400  |
| H  | -4.35129100 | 1.82567100  | 1.50176000  |
| H  | -6.21147900 | 0.42292400  | 0.69005000  |

|   |             |             |             |
|---|-------------|-------------|-------------|
| H | -1.93073300 | 2.21011500  | 1.72748700  |
| H | -2.99270400 | -2.77722700 | -1.34306400 |
| O | -1.01979800 | -1.54874600 | -0.70055400 |
| H | -0.07641300 | -1.29705500 | -0.59147800 |

Structure and coordinates of 1-Int-o4.log

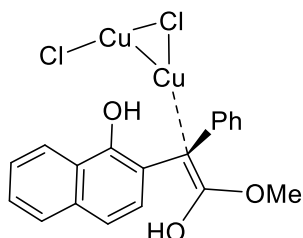

|    |             |             |             |
|----|-------------|-------------|-------------|
| C  | 0.12705200  | 4.42186000  | -0.68147900 |
| C  | 0.43744200  | 3.08823500  | -0.42956500 |
| C  | -0.42405700 | 2.27275500  | 0.31781900  |
| C  | -1.61166700 | 2.83598200  | 0.80500900  |
| C  | -1.92505500 | 4.17008300  | 0.55224200  |
| C  | -1.05891100 | 4.96869500  | -0.19263300 |
| H  | 0.80816800  | 5.02974700  | -1.26964900 |
| H  | 1.35982700  | 2.67072300  | -0.82644700 |
| H  | -2.30069400 | 2.22518300  | 1.38098300  |
| H  | -2.85193600 | 4.58382100  | 0.93839200  |
| H  | -1.30726200 | 6.00606100  | -0.39562000 |
| C  | 1.01699200  | 0.49504000  | 1.33019000  |
| O  | 1.16722400  | -0.69726900 | 1.89524500  |
| O  | 1.87910900  | 1.46352200  | 1.61562600  |
| C  | 3.11995100  | 1.16731200  | 2.27282400  |
| H  | 3.57766800  | 2.13768200  | 2.45780600  |
| H  | 2.94757800  | 0.65273800  | 3.22095600  |
| H  | 3.76727100  | 0.57499800  | 1.62128600  |
| C  | -0.13326700 | 0.81100500  | 0.58605600  |
| Cu | 1.08740900  | 0.08881400  | -0.95069300 |
| Cl | 2.47503600  | -0.59924300 | -2.55876800 |
| Cu | 3.15191000  | -1.53458600 | -0.67798500 |
| Cl | 3.71355500  | -2.31654200 | 1.26941400  |
| C  | -4.32326200 | -1.02911100 | -1.42741900 |
| C  | -3.41800800 | -0.94548800 | -0.33565200 |
| C  | -5.47726300 | -1.76810400 | -1.31976000 |
| C  | -2.21745700 | -0.17435400 | -0.41335400 |
| C  | -3.71710700 | -1.63482700 | 0.87045200  |
| C  | -5.77711500 | -2.45866000 | -0.12066800 |
| H  | -6.16693700 | -1.82163100 | -2.15684700 |
| C  | -1.33745300 | -0.08985000 | 0.65562200  |
| C  | -2.82350200 | -1.52085700 | 1.96898100  |

|   |             |             |             |
|---|-------------|-------------|-------------|
| C | -4.91593600 | -2.39300900 | 0.94768800  |
| H | -6.69394800 | -3.03615800 | -0.04730800 |
| C | -1.68726800 | -0.76666800 | 1.85968500  |
| H | -3.05957100 | -2.02533600 | 2.90160200  |
| H | -5.14109700 | -2.91695600 | 1.87297200  |
| H | -1.03257800 | -0.67305800 | 2.71815100  |
| H | -4.09635800 | -0.49962400 | -2.34618400 |
| O | -2.02548400 | 0.46357500  | -1.59805700 |
| H | -1.32340700 | 1.12435600  | -1.52705100 |
| H | 2.07556400  | -1.07568800 | 1.82892300  |

Structure and coordinates of 1-Int-p4.log

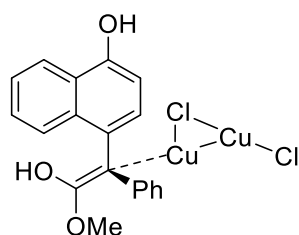

|    |             |             |             |
|----|-------------|-------------|-------------|
| C  | -0.13637800 | 4.50719200  | 0.11554400  |
| C  | 0.19349500  | 3.17395700  | 0.34439900  |
| C  | -0.65606200 | 2.13226900  | -0.07346900 |
| C  | -1.83165700 | 2.49103400  | -0.75357400 |
| C  | -2.16031100 | 3.82612900  | -0.97939900 |
| C  | -1.31783600 | 4.84524400  | -0.54243400 |
| H  | 0.54302700  | 5.28485100  | 0.45277400  |
| H  | 1.12651600  | 2.95054000  | 0.84617400  |
| H  | -2.50782700 | 1.72249700  | -1.11111100 |
| H  | -3.08347200 | 4.06371300  | -1.50024400 |
| H  | -1.57237300 | 5.88632000  | -0.71726800 |
| C  | 0.38491600  | 0.21687100  | 1.24602000  |
| O  | 0.36047600  | -1.07358700 | 1.56957400  |
| O  | 0.95828500  | 1.07203900  | 2.08349600  |
| C  | 1.79132900  | 0.60077500  | 3.15428000  |
| H  | 2.00752000  | 1.48572100  | 3.75053500  |
| H  | 1.26580200  | -0.13835700 | 3.76264900  |
| H  | 2.72052900  | 0.18566500  | 2.75630300  |
| C  | -0.34699300 | 0.67163900  | 0.13791600  |
| Cu | 1.45699300  | 0.48649000  | -0.84420900 |
| Cl | 3.33714700  | 0.18082600  | -2.01812100 |
| Cu | 3.36493000  | -1.17500100 | -0.26241800 |
| Cl | 3.16738300  | -2.38337700 | 1.53060000  |
| C  | -4.68081000 | -1.80012200 | 0.48739700  |
| C  | -3.48721400 | -1.52607700 | -0.23074100 |
| C  | -4.93318800 | -1.18046700 | 1.68716300  |

|   |             |             |             |
|---|-------------|-------------|-------------|
| C | -3.22099800 | -2.14877900 | -1.48844600 |
| C | -2.53438600 | -0.60994600 | 0.29922900  |
| C | -3.99934900 | -0.26035400 | 2.21596400  |
| H | -5.85083300 | -1.39203800 | 2.22778600  |
| C | -2.07184300 | -1.85804400 | -2.18071000 |
| C | -1.32907400 | -0.32622000 | -0.42987300 |
| C | -2.83479300 | 0.01492800  | 1.54126500  |
| H | -4.20469600 | 0.23444700  | 3.16071700  |
| C | -1.13852400 | -0.94319100 | -1.64334400 |
| H | -2.13732000 | 0.73320500  | 1.96039400  |
| H | -0.24028400 | -0.73530500 | -2.22212900 |
| H | -5.39428800 | -2.50417500 | 0.07288900  |
| O | -4.15948900 | -3.01787500 | -1.94315300 |
| H | -3.87936500 | -3.39239400 | -2.78826500 |
| H | 1.25368700  | -1.45056900 | 1.74634100  |
| H | -1.87550000 | -2.32958800 | -3.13997000 |

Structure and coordinates of 1-Int-p5.log

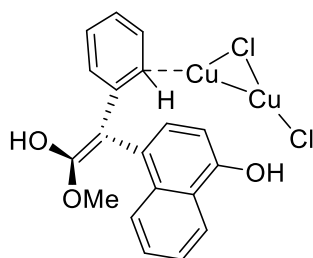

|   |             |             |             |
|---|-------------|-------------|-------------|
| C | -2.44360900 | 1.41729900  | 2.56840400  |
| C | -1.55021200 | 1.90058700  | 1.61024000  |
| C | -0.31184800 | 1.27533100  | 1.37209900  |
| C | -0.01525700 | 0.12334500  | 2.16144700  |
| C | -0.92169600 | -0.35069100 | 3.13392000  |
| C | -2.15021700 | 0.29448000  | 3.33364000  |
| H | -3.38553800 | 1.93798300  | 2.71407100  |
| H | -1.82122000 | 2.78125900  | 1.04595300  |
| H | 0.97691500  | -0.31758700 | 2.11625400  |
| H | -0.62484000 | -1.17378100 | 3.77859900  |
| H | -2.84426500 | -0.06799500 | 4.08444000  |
| C | 0.69441400  | 1.73624300  | 0.39885700  |
| C | 0.52335700  | 2.75402700  | -0.48330100 |
| O | 1.45837100  | 2.98002400  | -1.42676200 |
| O | -0.52919400 | 3.57946000  | -0.46481600 |
| C | -1.04724100 | 4.06394900  | -1.71651700 |
| H | -2.08486100 | 4.33177000  | -1.51980300 |
| H | -0.50358600 | 4.95654500  | -2.04203600 |
| H | -1.01138000 | 3.28591700  | -2.48154500 |



|    |             |             |             |
|----|-------------|-------------|-------------|
| C  | 3.53066400  | -2.04890700 | -1.23666600 |
| C  | 3.39035200  | -0.87803100 | -0.44501400 |
| C  | 2.49305500  | -2.49074100 | -2.02194200 |
| C  | 4.45404000  | -0.40005300 | 0.37875900  |
| C  | 2.16275300  | -0.15552300 | -0.46551000 |
| C  | 1.27514100  | -1.77210400 | -2.05678800 |
| H  | 2.60747100  | -3.39058500 | -2.61869000 |
| C  | 4.29247300  | 0.73180900  | 1.14108800  |
| C  | 2.00278900  | 1.01120200  | 0.34866200  |
| C  | 1.11890400  | -0.63350600 | -1.30399400 |
| H  | 0.46047300  | -2.11989900 | -2.68566600 |
| C  | 3.06044100  | 1.42421300  | 1.12386900  |
| H  | 0.18740200  | -0.07513900 | -1.35007200 |
| H  | 2.94961700  | 2.30562100  | 1.74966700  |
| H  | 4.47045700  | -2.59044400 | -1.21234700 |
| Cu | -1.11351200 | -1.37753500 | 1.15068600  |
| Cl | -2.18002600 | -2.92896800 | -0.04643100 |
| Cu | -2.47803800 | -1.03097600 | -1.12989700 |
| Cl | -2.73958300 | 0.82273100  | -2.18466000 |
| O  | 5.60591300  | -1.12110300 | 0.35856600  |
| H  | 6.25734400  | -0.71910400 | 0.94762900  |
| H  | 1.41692600  | 3.89153000  | -1.74864600 |
| H  | 5.10684200  | 1.09211200  | 1.76442100  |

Structure and coordinates of 1-Int-o5.log

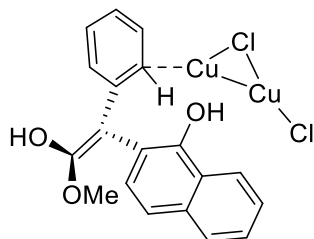

|   |             |            |             |
|---|-------------|------------|-------------|
| C | -3.35356100 | 1.16892600 | 0.69393200  |
| C | -2.27220300 | 1.66723100 | -0.03939000 |
| C | -0.97997400 | 1.68582900 | 0.49369600  |
| C | -0.79217000 | 1.16234500 | 1.80087500  |
| C | -1.88465100 | 0.65310400 | 2.53471600  |
| C | -3.17355600 | 0.65493000 | 1.97183700  |
| H | -4.34104300 | 1.16628000 | 0.24325800  |
| H | -2.43808400 | 2.04047500 | -1.04427600 |
| H | 0.17535900  | 1.27103800 | 2.28629900  |
| H | -1.74079600 | 0.34627100 | 3.56747100  |
| H | -4.01353600 | 0.26675300 | 2.53805800  |
| C | 0.18499000  | 2.21155800 | -0.25053500 |
| C | 0.11907100  | 3.28884500 | -1.05908100 |

|    |             |             |             |
|----|-------------|-------------|-------------|
| O  | 1.16984800  | 3.64072400  | -1.82708900 |
| O  | -0.94439800 | 4.10559400  | -1.23671300 |
| C  | -1.36817800 | 4.86817400  | -0.09551200 |
| H  | -2.09311100 | 5.59034400  | -0.47111000 |
| H  | -1.84368700 | 4.22972400  | 0.65352500  |
| H  | -0.51448600 | 5.39247200  | 0.34455800  |
| C  | 3.16341600  | -1.70264000 | -1.12242200 |
| C  | 2.90723900  | -0.45175900 | -0.49690800 |
| C  | 4.33524300  | -2.38061400 | -0.88746700 |
| C  | 1.69664200  | 0.28244900  | -0.70172600 |
| C  | 3.89798800  | 0.10118000  | 0.36572900  |
| C  | 5.31307700  | -1.83990400 | -0.01890400 |
| H  | 4.51366200  | -3.33421100 | -1.37481200 |
| C  | 1.48590500  | 1.50244600  | -0.08639700 |
| C  | 3.67421800  | 1.36532600  | 0.97409900  |
| C  | 5.09814000  | -0.62740500 | 0.58835000  |
| H  | 6.23624900  | -2.38335800 | 0.15868300  |
| C  | 2.50288900  | 2.03891700  | 0.74436100  |
| H  | 4.43907400  | 1.78411800  | 1.62185700  |
| H  | 5.84752400  | -0.20172300 | 1.25054300  |
| H  | 2.32510900  | 3.00349200  | 1.21239700  |
| H  | 2.44215300  | -2.14074900 | -1.80693200 |
| Cu | -0.79457100 | -0.93330100 | 1.45464100  |
| Cl | -0.40709400 | -3.01630700 | 0.78774600  |
| Cu | -1.89022000 | -2.32864300 | -0.68988400 |
| Cl | -3.34519900 | -1.70578500 | -2.14810700 |
| O  | 0.71850000  | -0.17322400 | -1.52668900 |
| H  | 0.96169300  | 4.48001500  | -2.26144700 |
| H  | 0.81307900  | -1.11738500 | -1.70149800 |

Structure and coordinates of 1-TS-o6-2w.log

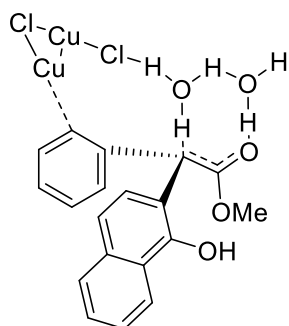

|   |            |             |             |
|---|------------|-------------|-------------|
| C | 2.75676900 | 1.51653800  | -1.94268400 |
| C | 1.74098100 | 1.92589800  | -1.07493700 |
| C | 0.46531000 | 1.35949700  | -1.13307700 |
| C | 0.23517500 | 0.32770500  | -2.07569200 |
| C | 1.27515700 | -0.11187800 | -2.91943600 |

|    |             |             |             |
|----|-------------|-------------|-------------|
| C  | 2.53772700  | 0.49477100  | -2.85824900 |
| H  | 3.73290900  | 1.98672500  | -1.87490300 |
| H  | 1.95578700  | 2.68882200  | -0.33261400 |
| H  | -0.77335500 | -0.05211600 | -2.22739600 |
| H  | 1.06937200  | -0.86963900 | -3.66961300 |
| H  | 3.33206000  | 0.16243900  | -3.51838700 |
| C  | -0.58384600 | 1.73471700  | -0.12028700 |
| C  | -0.85993400 | 3.14119900  | 0.05909600  |
| O  | -1.57639700 | 3.59753600  | 1.02175900  |
| O  | -0.34149300 | 4.00901400  | -0.75444800 |
| C  | -0.46509700 | 5.42061400  | -0.46044200 |
| H  | 0.08171500  | 5.91752200  | -1.25892900 |
| H  | -1.51553000 | 5.71311900  | -0.47381200 |
| H  | -0.01503300 | 5.63618800  | 0.50955800  |
| O  | -1.75301500 | 2.04993600  | 2.95777600  |
| H  | -1.77340600 | 2.50096400  | 3.81125600  |
| H  | -1.73594100 | 2.92055100  | 1.81338400  |
| O  | 0.36286500  | 0.85562200  | 2.13547700  |
| H  | 0.01429800  | 1.44775400  | 1.01274800  |
| H  | -0.88506300 | 1.55019500  | 2.88795600  |
| H  | 1.31775800  | 0.89233800  | 2.28871900  |
| C  | -2.72923300 | -2.71793800 | 0.60323700  |
| C  | -2.83550800 | -1.35423900 | 0.22082500  |
| C  | -3.81585500 | -3.55339000 | 0.50305100  |
| C  | -1.72054700 | -0.46767700 | 0.30998100  |
| C  | -4.07566500 | -0.85871900 | -0.26592900 |
| C  | -5.05350200 | -3.06455000 | 0.01753900  |
| H  | -3.72729400 | -4.59504700 | 0.79693000  |
| C  | -1.81671700 | 0.85555400  | -0.08962000 |
| C  | -4.16789700 | 0.50604500  | -0.65146200 |
| C  | -5.18012100 | -1.74845100 | -0.35650000 |
| H  | -5.90326800 | -3.73677100 | -0.05650800 |
| C  | -3.07197000 | 1.32361200  | -0.56990900 |
| H  | -5.11138400 | 0.88911200  | -1.02980700 |
| H  | -6.12735500 | -1.36833400 | -0.73027000 |
| H  | -3.15951200 | 2.35520600  | -0.90063600 |
| H  | -1.77982700 | -3.08535700 | 0.97783800  |
| Cu | 0.95025100  | -1.30346400 | -0.89875200 |
| Cl | 2.20310500  | -3.08797600 | -0.26526600 |
| Cu | 2.99818200  | -1.37343600 | 0.87096700  |
| Cl | 3.77295200  | 0.30161200  | 1.99632500  |
| O  | -0.54449600 | -1.00900100 | 0.73815100  |
| H  | -0.08554100 | -0.35609600 | 1.38951800  |

Structure and coordinates of 1-TS-p6-2w.log

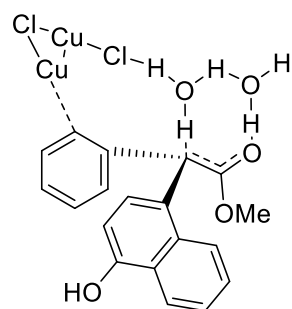

|   |             |             |             |
|---|-------------|-------------|-------------|
| C | -2.43099500 | 0.76103500  | 2.65407800  |
| C | -1.46291500 | 1.30112500  | 1.80695200  |
| C | -0.22139600 | 0.66282400  | 1.57493200  |
| C | -0.05609700 | -0.61386900 | 2.19826500  |
| C | -1.04448400 | -1.15607200 | 3.05306500  |
| C | -2.23933200 | -0.46067400 | 3.29416300  |
| H | -3.35684900 | 1.30875200  | 2.80556400  |
| H | -1.66790100 | 2.25020500  | 1.33271100  |
| H | 0.90250100  | -1.11926400 | 2.13238300  |
| H | -0.83117800 | -2.07952500 | 3.58550500  |
| H | -2.98935600 | -0.87053300 | 3.96206500  |
| C | 0.87205400  | 1.21613700  | 0.75881600  |
| C | 1.07339000  | 2.60804600  | 0.57392500  |
| O | 2.04795200  | 3.12607700  | -0.04396000 |
| O | 0.12563300  | 3.43774200  | 1.07035600  |
| C | 0.25313900  | 4.82788200  | 0.77961000  |
| H | -0.59437600 | 5.30420200  | 1.27404900  |
| H | 1.18910700  | 5.23189100  | 1.17242400  |
| H | 0.19753500  | 5.01269700  | -0.29720500 |
| O | 1.64391200  | 3.29311600  | -2.51544600 |
| H | 1.33390800  | 4.15725500  | -2.82140900 |
| H | 1.93221100  | 3.36343100  | -1.53659500 |
| O | 0.04406100  | 1.57366500  | -2.07841700 |
| H | 0.22323800  | 1.38052900  | -1.11168600 |
| H | 0.75165300  | 2.45861700  | -2.40093700 |
| H | -0.93087000 | 1.70231400  | -2.17505900 |
| C | 3.32827800  | -2.66064100 | -1.36226500 |
| C | 3.31470200  | -1.53143300 | -0.49953200 |
| C | 2.19031300  | -3.05929200 | -2.01910700 |
| C | 4.49023700  | -1.13191200 | 0.20022700  |
| C | 2.11165800  | -0.78335000 | -0.31997900 |
| C | 0.98514000  | -2.34416500 | -1.83017200 |
| H | 2.21128600  | -3.92338600 | -2.67638100 |
| C | 4.45901000  | -0.04910900 | 1.04458200  |
| C | 2.09411800  | 0.36610900  | 0.54217200  |

|    |             |             |             |
|----|-------------|-------------|-------------|
| C  | 0.95576100  | -1.24232200 | -1.01115000 |
| H  | 0.07859800  | -2.66561800 | -2.33469000 |
| C  | 3.26223700  | 0.67957900  | 1.20672300  |
| H  | 0.01620700  | -0.71587000 | -0.87393600 |
| H  | 3.27174500  | 1.53354600  | 1.87791800  |
| H  | 4.25745300  | -3.20495300 | -1.49356000 |
| Cu | -1.39433300 | -1.76611400 | 0.99612900  |
| Cl | -2.87800200 | -2.49863300 | -0.49135000 |
| Cu | -2.92175900 | -0.41296600 | -1.21671700 |
| O  | 5.60832700  | -1.87762800 | -0.01040200 |
| H  | 6.34332900  | -1.51707400 | 0.50204600  |
| H  | 5.35301400  | 0.24828300  | 1.58757500  |
| Cl | -2.99803300 | 1.59126000  | -2.05939100 |

Structure and coordinates of 1-Int-o7.log

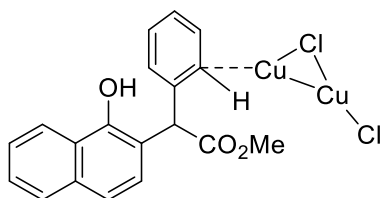

|   |             |             |             |
|---|-------------|-------------|-------------|
| C | 3.39745600  | 1.60705800  | -0.85485600 |
| C | 2.34455200  | 1.75660600  | 0.04968800  |
| C | 1.03108500  | 1.46221900  | -0.31788300 |
| C | 0.77921900  | 0.99888400  | -1.62821600 |
| C | 1.84949300  | 0.83166500  | -2.53599200 |
| C | 3.16095100  | 1.13743000  | -2.14278900 |
| H | 4.40854300  | 1.85015300  | -0.54358400 |
| H | 2.54720900  | 2.11111500  | 1.05634400  |
| H | -0.24119400 | 0.87547100  | -1.98137200 |
| H | 1.64146700  | 0.54115200  | -3.56166300 |
| H | 3.97712700  | 1.01926900  | -2.84778600 |
| C | -0.08671400 | 1.68886200  | 0.69451400  |
| C | -0.30001900 | 3.17208100  | 1.00440000  |
| O | -0.72466300 | 3.57365400  | 2.06670500  |
| O | 0.00471700  | 3.96479400  | -0.02116400 |
| C | -0.19506000 | 5.37404200  | 0.17131500  |
| H | 0.11555200  | 5.84056600  | -0.76241700 |
| H | -1.24842500 | 5.58320300  | 0.37057500  |
| H | 0.41997500  | 5.73451800  | 0.99867700  |
| H | 0.25741500  | 1.28157100  | 1.65045700  |
| C | -3.43094500 | -2.06890100 | 0.77857800  |
| C | -3.02398000 | -0.78780100 | 0.32034000  |
| C | -4.59054800 | -2.64074500 | 0.31013800  |
| C | -1.80698100 | -0.18161100 | 0.77830500  |

|    |             |             |             |
|----|-------------|-------------|-------------|
| C  | -3.83304700 | -0.09812500 | -0.62239200 |
| C  | -5.39648700 | -1.95801800 | -0.63164200 |
| H  | -4.89148100 | -3.62222800 | 0.66422600  |
| C  | -1.41466600 | 1.05729600  | 0.30407900  |
| C  | -3.42377400 | 1.18292300  | -1.08272700 |
| C  | -5.02640000 | -0.71473500 | -1.08406300 |
| H  | -6.30871000 | -2.42093300 | -0.99628600 |
| C  | -2.25496400 | 1.72791000  | -0.62873100 |
| H  | -4.04301700 | 1.71746900  | -1.79709400 |
| H  | -5.64130400 | -0.18311600 | -1.80556400 |
| H  | -1.94310200 | 2.69941500  | -1.00219700 |
| H  | -2.81331900 | -2.59300900 | 1.49954400  |
| Cu | 1.32102600  | -1.01762700 | -1.35083200 |
| Cl | 1.90327100  | -3.13172600 | -0.93230300 |
| Cu | 2.01223700  | -2.01623200 | 0.98001900  |
| Cl | 1.94234700  | -0.75585500 | 2.74657200  |
| O  | -1.11705200 | -0.92464900 | 1.67272900  |
| H  | -0.25592000 | -0.55646200 | 1.93058200  |

Structure and coordinates of Product-o8.log

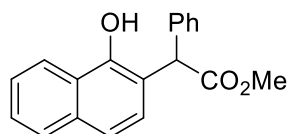

|   |             |             |             |
|---|-------------|-------------|-------------|
| C | -3.59245700 | -2.52083300 | -0.28985800 |
| C | -2.88326400 | -1.47807700 | -0.88559500 |
| C | -1.93241600 | -0.75837900 | -0.15589100 |
| C | -1.69810200 | -1.10004500 | 1.17875300  |
| C | -2.40728200 | -2.13877900 | 1.77549300  |
| C | -3.35624800 | -2.85254900 | 1.04276200  |
| H | -4.32422300 | -3.07530600 | -0.86970500 |
| H | -3.06680900 | -1.22451600 | -1.92709300 |
| H | -0.95782300 | -0.55143800 | 1.75368200  |
| H | -2.21660200 | -2.39277000 | 2.81387900  |
| H | -3.90315700 | -3.66731000 | 1.50769500  |
| C | -1.17774700 | 0.38476800  | -0.83039600 |
| C | -1.91343600 | 1.71698200  | -0.72157900 |
| O | -1.94246200 | 2.53696300  | -1.61612200 |
| O | -2.50080900 | 1.89076500  | 0.45917000  |
| C | -3.16934000 | 3.14409800  | 0.66799400  |
| H | -3.58624800 | 3.08515700  | 1.67217200  |
| H | -2.45673000 | 3.96915800  | 0.59857200  |
| H | -3.96570300 | 3.27795300  | -0.06701500 |
| H | -1.16357600 | 0.19114100  | -1.90939400 |

|   |             |             |             |
|---|-------------|-------------|-------------|
| C | 3.49331500  | -1.38269700 | -0.64708000 |
| C | 2.54735400  | -0.38244900 | -0.29585200 |
| C | 4.80419800  | -1.26844900 | -0.25234300 |
| C | 1.17860500  | -0.46917100 | -0.69275900 |
| C | 2.96781500  | 0.73620900  | 0.47411600  |
| C | 5.22816600  | -0.15494100 | 0.51319000  |
| H | 5.52151000  | -2.03565000 | -0.52727000 |
| C | 0.26727000  | 0.51680800  | -0.35954800 |
| C | 2.01790600  | 1.72897600  | 0.82955800  |
| C | 4.33104700  | 0.82143700  | 0.86847400  |
| H | 6.26749000  | -0.07655400 | 0.81796600  |
| C | 0.71459800  | 1.61283800  | 0.42296300  |
| H | 2.33395800  | 2.58002900  | 1.42554400  |
| H | 4.65015900  | 1.67749200  | 1.45700400  |
| H | 0.00755000  | 2.38396300  | 0.71267700  |
| H | 3.16901000  | -2.23674700 | -1.23133300 |
| O | 0.85262900  | -1.56984500 | -1.42111800 |
| H | -0.10355400 | -1.70216000 | -1.45723300 |

Structure and coordinates of React-moCuCl.log

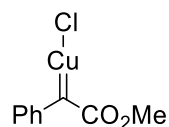

|    |             |             |             |
|----|-------------|-------------|-------------|
| C  | -2.53728800 | -2.46947600 | -0.17628800 |
| C  | -1.33790600 | -1.78864400 | -0.06833300 |
| C  | -1.31755600 | -0.37455200 | 0.06844100  |
| C  | -2.55504100 | 0.32672500  | 0.09932000  |
| C  | -3.74919100 | -0.35981400 | -0.00871400 |
| C  | -3.73780700 | -1.75371600 | -0.14805800 |
| H  | -2.54812500 | -3.54857200 | -0.28476100 |
| H  | -0.39099400 | -2.32046200 | -0.08880100 |
| H  | -2.56608900 | 1.40719000  | 0.20918200  |
| H  | -4.69256600 | 0.17490800  | 0.01241500  |
| H  | -4.67995600 | -2.28652700 | -0.23646600 |
| C  | -0.06287700 | 0.28302300  | 0.14243100  |
| C  | -0.06672900 | 1.74935600  | 0.34724200  |
| O  | -0.05220400 | 2.23071700  | 1.46502600  |
| O  | -0.02662700 | 2.43473500  | -0.78727100 |
| C  | 0.06402900  | 3.86853900  | -0.67244400 |
| H  | 0.97135000  | 4.14727400  | -0.13291500 |
| H  | 0.10342800  | 4.23619600  | -1.69627200 |
| H  | -0.81568400 | 4.26235600  | -0.15969900 |
| Cu | 1.61494400  | -0.51763200 | 0.05395500  |

|    |            |             |             |
|----|------------|-------------|-------------|
| Cl | 3.54224200 | -1.48666500 | -0.12417700 |
|----|------------|-------------|-------------|

Structure and coordinates of 1'-TS-o1.log

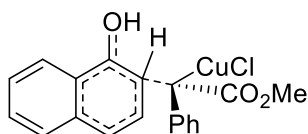

|    |             |             |             |
|----|-------------|-------------|-------------|
| C  | 1.66844700  | 0.33254500  | 2.55639100  |
| C  | 0.61163200  | -0.02139000 | 1.73014800  |
| C  | 0.07535000  | 0.89566400  | 0.80199500  |
| C  | 0.65412100  | 2.18004500  | 0.72575300  |
| C  | 1.70819500  | 2.53754400  | 1.55752700  |
| C  | 2.22124200  | 1.61246200  | 2.46755200  |
| H  | 2.06614700  | -0.38656100 | 3.26550300  |
| H  | 0.17883300  | -1.01648600 | 1.79080300  |
| H  | 0.26962300  | 2.90219500  | 0.01219700  |
| H  | 2.14045400  | 3.53084400  | 1.48702700  |
| H  | 3.05038200  | 1.88984700  | 3.11193400  |
| C  | -1.02561000 | 0.47900800  | -0.05654600 |
| C  | -1.88040200 | 1.54731800  | -0.66448500 |
| O  | -2.21489100 | 1.67503900  | -1.82819900 |
| O  | -2.36836200 | 2.32066800  | 0.31905600  |
| C  | -3.38272400 | 3.26353300  | -0.05312400 |
| H  | -4.24909900 | 2.74859300  | -0.47505300 |
| H  | -3.65902300 | 3.76933300  | 0.87131600  |
| H  | -2.99232000 | 3.98352400  | -0.77620900 |
| Cu | -2.16108100 | -1.00490500 | 0.37261300  |
| Cl | -3.40632100 | -2.71664200 | 0.81749700  |
| C  | 0.71174400  | 0.99471000  | -2.30674000 |
| C  | 1.99409900  | 1.16532800  | -1.89341700 |
| C  | 2.65041800  | 0.14186500  | -1.12969000 |
| C  | 1.99981400  | -1.10159400 | -0.89857600 |
| C  | 0.66949100  | -1.26184700 | -1.37679000 |
| C  | -0.02734600 | -0.17861300 | -1.93994700 |
| H  | 4.44058100  | 1.28470900  | -0.74815300 |
| H  | 0.19367800  | 1.76962000  | -2.85988400 |
| C  | 3.93881900  | 0.33521800  | -0.58575000 |
| C  | 2.64986900  | -2.11832800 | -0.15727600 |
| H  | -0.98476600 | -0.36334200 | -2.41558100 |
| C  | 3.90385900  | -1.89704100 | 0.36363900  |
| C  | 4.54716500  | -0.65909800 | 0.15152500  |
| H  | 2.14266500  | -3.06188900 | 0.01171700  |
| H  | 4.39731800  | -2.67023700 | 0.94356700  |
| H  | 5.53353000  | -0.49074000 | 0.57348000  |



|   |             |             |             |
|---|-------------|-------------|-------------|
| O | 0.10739000  | -2.45381500 | -1.19319300 |
| H | -0.80872400 | -2.46143300 | -1.51253500 |
| H | 2.53732000  | 2.07808800  | -2.11781900 |

Structure and coordinates of 1'-TS-p1.log

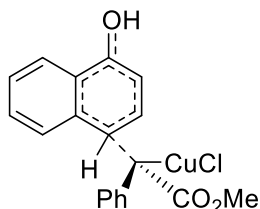

|    |             |             |             |
|----|-------------|-------------|-------------|
| C  | 0.97964200  | -1.42512800 | 2.67416900  |
| C  | 0.04425900  | -1.08115600 | 1.70209600  |
| C  | 0.04423800  | 0.19835500  | 1.11213400  |
| C  | 1.02373400  | 1.12528000  | 1.53653800  |
| C  | 1.94924300  | 0.78517800  | 2.50879700  |
| C  | 1.93497800  | -0.49505600 | 3.07527100  |
| H  | 0.95950900  | -2.41518400 | 3.11876100  |
| H  | -0.71274200 | -1.79737700 | 1.39631300  |
| H  | 1.05656700  | 2.11516300  | 1.09363500  |
| H  | 2.69253000  | 1.51042100  | 2.82490600  |
| H  | 2.66652200  | -0.76024500 | 3.83270100  |
| C  | -0.93266800 | 0.50363400  | 0.07619500  |
| C  | -1.16195800 | 1.93462000  | -0.28805600 |
| O  | -1.15528600 | 2.44816400  | -1.39318700 |
| O  | -1.52129400 | 2.61068600  | 0.81595700  |
| C  | -1.95090500 | 3.96484600  | 0.62087700  |
| H  | -2.85719300 | 3.99448100  | 0.01071400  |
| H  | -2.15713000 | 4.34914600  | 1.61922300  |
| H  | -1.16380100 | 4.55314600  | 0.14403200  |
| Cu | -2.55112900 | -0.49459600 | -0.10177900 |
| Cl | -4.34698100 | -1.71557700 | -0.16961500 |
| C  | -0.17929500 | -1.44585800 | -1.71504900 |
| C  | 0.20603200  | -0.09805500 | -1.77526100 |
| C  | 1.56560600  | 0.25074500  | -1.46182600 |
| C  | 2.42143800  | -0.72106200 | -0.88573700 |
| C  | 1.91376100  | -2.05121300 | -0.71030000 |
| C  | 0.64663200  | -2.41295000 | -1.15812900 |
| H  | 1.40596200  | 2.30821300  | -2.08386400 |
| H  | -1.16259800 | -1.73109100 | -2.07614400 |
| C  | 2.06080000  | 1.55849100  | -1.65094500 |
| C  | 3.73841100  | -0.37469500 | -0.50578100 |
| H  | 0.31063400  | -3.44063100 | -1.05704500 |
| C  | 4.19509400  | 0.90987400  | -0.70230700 |

|   |             |             |             |
|---|-------------|-------------|-------------|
| C | 3.35032800  | 1.87965500  | -1.28006800 |
| H | 4.38157400  | -1.12611500 | -0.06103000 |
| H | 5.20669400  | 1.17705200  | -0.41339900 |
| H | 3.72001100  | 2.88913800  | -1.43365100 |
| O | 2.74000700  | -2.92799700 | -0.13574500 |
| H | 2.31878900  | -3.79668800 | -0.05732700 |
| H | -0.38756400 | 0.59881800  | -2.35470100 |

Structure and coordinates of 1'-Int-p2.log

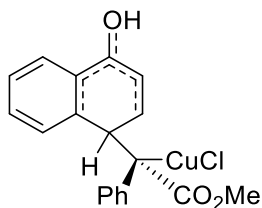

|    |             |             |             |
|----|-------------|-------------|-------------|
| C  | 0.58325700  | -1.32168400 | 2.93938700  |
| C  | -0.12612900 | -1.04931500 | 1.76887800  |
| C  | -0.02722700 | 0.18995100  | 1.12185000  |
| C  | 0.81220900  | 1.15553000  | 1.70270500  |
| C  | 1.51589500  | 0.89504800  | 2.87517000  |
| C  | 1.40993100  | -0.34979400 | 3.49803800  |
| H  | 0.47821800  | -2.29145900 | 3.41786100  |
| H  | -0.77707800 | -1.81277100 | 1.34931700  |
| H  | 0.91803600  | 2.12645900  | 1.22877400  |
| H  | 2.15470900  | 1.66450700  | 3.30003100  |
| H  | 1.95886000  | -0.55456000 | 4.41275300  |
| C  | -1.18195700 | 1.79703100  | -0.49066800 |
| O  | -1.23282900 | 2.33264200  | -1.59624500 |
| O  | -1.63389300 | 2.43553500  | 0.61042300  |
| C  | -2.21978100 | 3.72056500  | 0.40628900  |
| H  | -2.55324000 | 4.04952000  | 1.39105900  |
| H  | -1.48690300 | 4.42725000  | 0.00678700  |
| H  | -3.07234300 | 3.65740500  | -0.27517800 |
| C  | -0.70751900 | 0.42645000  | -0.21078200 |
| Cu | -2.45487400 | -0.53347800 | -0.25747200 |
| Cl | -4.27008200 | -1.73659800 | -0.27482300 |
| C  | 3.92194500  | -0.24599000 | -0.55204800 |
| C  | 2.59532200  | -0.63193100 | -0.83252300 |
| C  | 4.29621500  | 1.07370300  | -0.71155500 |
| C  | 2.19213900  | -2.01018300 | -0.74370900 |
| C  | 1.63792000  | 0.31550300  | -1.25103000 |
| C  | 3.35597700  | 2.01280700  | -1.15951100 |
| H  | 5.31609900  | 1.37896800  | -0.50307100 |
| C  | 0.91564600  | -2.45512700 | -1.16564700 |

|   |             |             |             |
|---|-------------|-------------|-------------|
| C | 0.20176600  | -0.07689700 | -1.41649600 |
| C | 2.04436300  | 1.64123900  | -1.42124900 |
| H | 3.65532000  | 3.04702000  | -1.30054000 |
| C | -0.01252700 | -1.53078100 | -1.52680700 |
| H | 0.69923300  | -3.51882000 | -1.17799600 |
| H | -0.22791900 | 0.41712400  | -2.29632500 |
| H | 1.32016100  | 2.37955100  | -1.74963900 |
| H | -0.99491200 | -1.85728300 | -1.85710400 |
| H | 4.64304200  | -0.98688000 | -0.22529400 |
| O | 3.08661100  | -2.85595400 | -0.29927800 |
| H | 2.74767300  | -3.76753100 | -0.28371000 |

Structure and coordinates of 1'-Int-o2.log

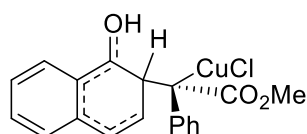

|   |             |             |             |
|---|-------------|-------------|-------------|
| C | 0.36640800  | 1.15479600  | 3.15212500  |
| C | -0.20559400 | 0.46982400  | 2.07913900  |
| C | -0.37448200 | 1.07984200  | 0.83008900  |
| C | 0.03955300  | 2.41451700  | 0.69668900  |
| C | 0.60310300  | 3.10744900  | 1.76488800  |
| C | 0.77543700  | 2.47729500  | 2.99838500  |
| H | 0.48490500  | 0.65337000  | 4.10838800  |
| H | -0.53411100 | -0.55731500 | 2.21621700  |
| H | -0.08662900 | 2.92094400  | -0.25627100 |
| H | 0.90983300  | 4.14133200  | 1.63296400  |
| H | 1.21886800  | 3.01428400  | 3.83181000  |
| C | -1.86132300 | 0.99522000  | -1.23668600 |
| O | -1.98690100 | 0.81728500  | -2.44509600 |
| O | -2.65713200 | 1.85054200  | -0.56397000 |
| C | -3.69068600 | 2.48636000  | -1.31810500 |
| H | -4.18426800 | 3.16438800  | -0.62186300 |
| H | -3.27282200 | 3.04843900  | -2.15689300 |
| H | -4.40638400 | 1.74917400  | -1.69222900 |
| C | -0.89319600 | 0.29053300  | -0.36163500 |
| C | 3.39425400  | -1.88359400 | 0.32438600  |
| C | 2.60360100  | -0.97604200 | -0.42124300 |
| C | 4.75408500  | -1.68808300 | 0.42156500  |
| C | 1.19497000  | -1.13382500 | -0.50445000 |
| C | 3.19985400  | 0.13782600  | -1.07191300 |
| C | 5.34643800  | -0.58626400 | -0.22166600 |
| H | 5.36640700  | -2.37639300 | 0.99370200  |
| C | 0.31344500  | -0.19498000 | -1.24876800 |

|    |             |             |             |
|----|-------------|-------------|-------------|
| C  | 2.38703300  | 1.06685800  | -1.83465100 |
| C  | 4.58625400  | 0.30971100  | -0.95613500 |
| H  | 6.41824000  | -0.43386600 | -0.13870200 |
| C  | 1.05855800  | 0.91585800  | -1.91683400 |
| H  | -0.13218500 | -0.80183600 | -2.05643800 |
| H  | 2.88920000  | 1.89136700  | -2.33177700 |
| H  | 5.05806300  | 1.15564600  | -1.44600000 |
| H  | 0.45602400  | 1.60762100  | -2.49547300 |
| H  | 2.92245400  | -2.72616400 | 0.81765300  |
| O  | 0.67520500  | -2.15354400 | 0.09808500  |
| H  | -0.31498800 | -2.09522000 | 0.07256800  |
| Cu | -2.18324200 | -1.15239000 | 0.15926600  |
| Cl | -3.48907200 | -2.80650300 | 0.65531800  |

Structure and coordinates of 1'-TS-p3.log

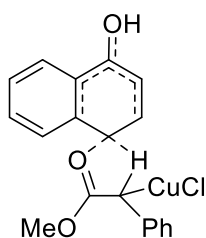

|    |             |             |             |
|----|-------------|-------------|-------------|
| C  | 0.24626200  | 2.05949700  | -2.86126000 |
| C  | 0.13669500  | 1.07303500  | -1.88629600 |
| C  | 0.76373900  | 1.20366900  | -0.63205300 |
| C  | 1.50674300  | 2.37583100  | -0.40246500 |
| C  | 1.61445000  | 3.36207100  | -1.38209600 |
| C  | 0.98640500  | 3.21644600  | -2.61746900 |
| H  | -0.25015000 | 1.92003900  | -3.81765700 |
| H  | -0.43854400 | 0.17826700  | -2.10912400 |
| H  | 2.01152800  | 2.51870400  | 0.54454200  |
| H  | 2.19569200  | 4.25535900  | -1.16942400 |
| H  | 1.07357000  | 3.98709300  | -3.37744800 |
| C  | 0.94165100  | 0.20474100  | 1.77322300  |
| O  | 0.33024000  | -0.54117300 | 2.59099300  |
| O  | 1.86756800  | 1.04973100  | 2.19502000  |
| C  | 2.21557800  | 1.00769700  | 3.58843800  |
| H  | 2.98636400  | 1.76744600  | 3.71183200  |
| H  | 1.34777000  | 1.24393800  | 4.20739100  |
| H  | 2.61006200  | 0.02378400  | 3.85081100  |
| C  | 0.60941200  | 0.09702600  | 0.36579700  |
| Cu | 2.18895800  | -1.02638800 | -0.19767600 |
| H  | -0.52033000 | -1.00651200 | 1.55268600  |
| C  | -0.71209800 | -0.69073900 | 0.33049100  |
| C  | -1.98094300 | 0.05472100  | 0.39911200  |

|    |             |             |             |
|----|-------------|-------------|-------------|
| C  | -0.76882300 | -1.97675900 | -0.27778100 |
| C  | -2.04470000 | 1.36854700  | 0.90774600  |
| C  | -3.19206500 | -0.56007600 | -0.00452800 |
| C  | -1.94503200 | -2.58713200 | -0.66427900 |
| H  | 0.16630900  | -2.51810300 | -0.40073200 |
| C  | -3.24967400 | 2.03333700  | 1.00107100  |
| H  | -1.13411900 | 1.86967600  | 1.21715800  |
| C  | -4.42196200 | 0.13294000  | 0.10132200  |
| C  | -3.14560600 | -1.89147200 | -0.53381100 |
| H  | -1.93952800 | -3.58995100 | -1.07944300 |
| C  | -4.44950900 | 1.41530000  | 0.59784000  |
| H  | -3.27194100 | 3.04702300  | 1.38939300  |
| H  | -5.33753500 | -0.35692000 | -0.21101300 |
| H  | -5.39061700 | 1.94905800  | 0.68005000  |
| O  | -4.30709700 | -2.42568700 | -0.89186300 |
| H  | -4.18955800 | -3.32347600 | -1.23862800 |
| Cl | 3.81249600  | -2.25030700 | -0.94053000 |

Structure and coordinates of 1'-TS-o3.log

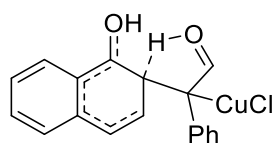

|    |             |             |             |
|----|-------------|-------------|-------------|
| C  | -0.32301100 | 2.57123500  | -2.51641000 |
| C  | -0.26394300 | 1.40429800  | -1.75966600 |
| C  | 0.35628800  | 1.37635300  | -0.49643000 |
| C  | 0.92826500  | 2.57604200  | -0.03381400 |
| C  | 0.86724500  | 3.74223000  | -0.79422200 |
| C  | 0.23892200  | 3.75444000  | -2.03846100 |
| H  | -0.81353900 | 2.55184500  | -3.48565900 |
| H  | -0.70672900 | 0.49847300  | -2.16486800 |
| H  | 1.42800400  | 2.59967700  | 0.92588700  |
| H  | 1.31662500  | 4.65065000  | -0.40211700 |
| H  | 0.19209000  | 4.66672500  | -2.62550700 |
| C  | 0.64975900  | -0.02223900 | 1.69028500  |
| O  | 0.18316200  | -1.01812600 | 2.31725000  |
| O  | 1.36011900  | 0.89806500  | 2.32520800  |
| C  | 1.68648100  | 0.64507600  | 3.70081700  |
| H  | 2.26339400  | 1.51178400  | 4.02095800  |
| H  | 0.77763500  | 0.55148100  | 4.29828000  |
| H  | 2.28821600  | -0.26236500 | 3.78628000  |
| C  | 0.37385400  | 0.09248500  | 0.27185200  |
| Cu | 2.20098300  | -0.62578300 | -0.23801300 |
| H  | -0.57382700 | -1.40679300 | 1.15946000  |

|    |             |             |             |
|----|-------------|-------------|-------------|
| C  | -0.79462200 | -0.87653100 | 0.03310200  |
| C  | -2.17245700 | -0.36617000 | 0.23065100  |
| C  | -0.66281600 | -2.01532300 | -0.82456400 |
| C  | -2.42892200 | 0.80817000  | 0.96110900  |
| C  | -3.27692300 | -1.10537200 | -0.25617800 |
| C  | -1.78054900 | -2.75087500 | -1.28068100 |
| C  | -3.72730400 | 1.23085700  | 1.18186800  |
| H  | -1.60739000 | 1.40221400  | 1.34532900  |
| C  | -4.59771700 | -0.66250900 | -0.01546800 |
| C  | -3.03853500 | -2.29835900 | -1.00242200 |
| H  | -1.62658700 | -3.65265100 | -1.86566100 |
| C  | -4.82322500 | 0.49561100  | 0.69572100  |
| H  | -3.89996100 | 2.14835500  | 1.73628000  |
| H  | -5.42686400 | -1.24998300 | -0.39976100 |
| H  | -5.83556200 | 0.84029500  | 0.87978500  |
| Cl | 4.21381100  | -1.29284100 | -0.69846800 |
| H  | -3.89602500 | -2.85873800 | -1.36579900 |
| O  | 0.56053100  | -2.40762100 | -1.13209600 |
| H  | 0.56197800  | -3.24000600 | -1.63198100 |

Structure and coordinates of 1'-Int-o4.log

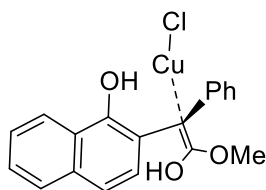

|   |            |             |             |
|---|------------|-------------|-------------|
| C | 1.69389700 | 2.46814100  | -2.56549600 |
| C | 1.31254900 | 1.35313600  | -1.82059100 |
| C | 1.20626500 | 1.42077900  | -0.42677400 |
| C | 1.47658700 | 2.64299900  | 0.20326300  |
| C | 1.85955100 | 3.75812900  | -0.53819800 |
| C | 1.97158900 | 3.67461100  | -1.92616000 |
| H | 1.77767000 | 2.38797300  | -3.64520100 |
| H | 1.10153200 | 0.41913800  | -2.33470800 |
| H | 1.38520800 | 2.72689400  | 1.28208100  |
| H | 2.06616200 | 4.69548600  | -0.02986400 |
| H | 2.27054900 | 4.54414300  | -2.50397600 |
| C | 0.69745600 | 0.23831900  | 0.37263800  |
| C | 1.36596400 | -0.09280000 | 1.57058500  |
| O | 0.83966400 | -0.83823400 | 2.53446400  |
| O | 2.55156500 | 0.39753100  | 1.85575000  |
| C | 3.32781900 | -0.20837200 | 2.90987700  |
| H | 3.47563400 | -1.27070900 | 2.70249600  |
| H | 4.28087400 | 0.31631400  | 2.88727000  |

|    |             |             |             |
|----|-------------|-------------|-------------|
| H  | 2.83948800  | -0.06651000 | 3.87495400  |
| Cu | 1.78709100  | -1.36115800 | -0.33535500 |
| Cl | 2.92768900  | -2.98870900 | -1.17615800 |
| C  | -1.42247900 | 1.04118400  | 1.44649300  |
| C  | -2.77666300 | 1.16245000  | 1.58225000  |
| C  | -3.64277300 | 0.43258400  | 0.72187900  |
| C  | -3.08044300 | -0.41317700 | -0.27035700 |
| C  | -1.65433500 | -0.51046300 | -0.38338900 |
| C  | -0.81863700 | 0.19259400  | 0.46727300  |
| H  | -5.48210000 | 1.18111900  | 1.57778000  |
| H  | -0.76817700 | 1.61916000  | 2.09440700  |
| C  | -5.05609000 | 0.52877100  | 0.82014800  |
| C  | -3.94098700 | -1.14296700 | -1.13215700 |
| C  | -5.30626000 | -1.03069200 | -1.01083500 |
| C  | -5.86996700 | -0.18508900 | -0.02652400 |
| H  | -3.51072400 | -1.79174200 | -1.88700400 |
| H  | -5.95637100 | -1.59438500 | -1.67306600 |
| H  | -6.94940400 | -0.10147800 | 0.05809000  |
| O  | -1.22518200 | -1.31685000 | -1.37972300 |
| H  | -0.25876000 | -1.39239200 | -1.35392800 |
| H  | -3.20070800 | 1.82116700  | 2.33442100  |
| H  | -0.05383700 | -1.13293400 | 2.28876800  |

Structure and coordinates of 1'-Int-p4.log

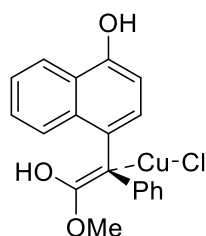

|   |             |             |             |
|---|-------------|-------------|-------------|
| C | -2.61665400 | 2.97649200  | 0.96452600  |
| C | -2.22399100 | 1.70872000  | 0.54516000  |
| C | -1.07958700 | 1.53400400  | -0.24431600 |
| C | -0.33224700 | 2.66587200  | -0.59096600 |
| C | -0.72304900 | 3.93646300  | -0.17034500 |
| C | -1.86742100 | 4.09837900  | 0.60758900  |
| H | -3.50587100 | 3.08640900  | 1.57826900  |
| H | -2.80656800 | 0.84067200  | 0.84427200  |
| H | 0.56592900  | 2.55481300  | -1.19113300 |
| H | -0.12715200 | 4.79996400  | -0.45176200 |
| H | -2.16924800 | 5.08724900  | 0.93998200  |
| C | -0.61487800 | 0.18002100  | -0.71863900 |
| C | -1.50370300 | -0.59881900 | -1.46012200 |
| O | -1.07582000 | -1.65366700 | -2.17873100 |

|    |             |             |             |
|----|-------------|-------------|-------------|
| O  | -2.74979800 | -0.16260000 | -1.67344600 |
| C  | -3.80316400 | -1.12488100 | -1.81564200 |
| H  | -3.74733100 | -1.87709900 | -1.02086200 |
| H  | -4.73014100 | -0.56174600 | -1.71644400 |
| H  | -3.78082500 | -1.59436600 | -2.80425400 |
| Cu | -1.22702900 | -1.27109800 | 0.65389800  |
| Cl | -1.88107200 | -2.72167600 | 2.11962300  |
| C  | 1.41390500  | -0.20398800 | -2.12672600 |
| C  | 0.86717800  | -0.01308200 | -0.87704700 |
| C  | 1.75392600  | 0.07013500  | 0.25258400  |
| C  | 3.15700800  | -0.09864300 | 0.06145600  |
| C  | 3.65693900  | -0.32462700 | -1.25684300 |
| C  | 2.80056700  | -0.36346500 | -2.32916100 |
| H  | 0.24410900  | 0.48866900  | 1.76584000  |
| H  | 0.76644700  | -0.23512100 | -2.99664100 |
| C  | 1.30036900  | 0.32345300  | 1.57813100  |
| C  | 4.03828800  | -0.04243500 | 1.17315400  |
| C  | 3.55766200  | 0.18827000  | 2.43866800  |
| C  | 2.17233600  | 0.37781900  | 2.63861900  |
| H  | 5.10055500  | -0.18487800 | 1.00716600  |
| H  | 4.23960700  | 0.22810100  | 3.28251600  |
| H  | 1.79108300  | 0.56893900  | 3.63719900  |
| O  | 4.99886700  | -0.48612400 | -1.37766600 |
| H  | 5.23085400  | -0.62444800 | -2.30526200 |
| H  | 3.18648600  | -0.51730900 | -3.33348800 |
| H  | -1.80275700 | -2.24854200 | -2.41377500 |

Structure and coordinates of 1'-Int-o5.log

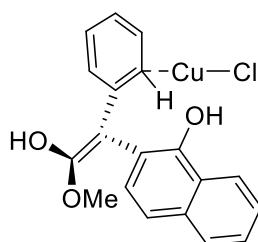

|   |             |             |             |
|---|-------------|-------------|-------------|
| C | 1.40043500  | -2.70586600 | -1.33542000 |
| C | 0.53733500  | -1.64965200 | -1.03577500 |
| C | 0.96603300  | -0.31152100 | -1.04630900 |
| C | 2.32759100  | -0.07262000 | -1.40219300 |
| C | 3.19323300  | -1.14688000 | -1.70038300 |
| C | 2.73214300  | -2.47343600 | -1.65410200 |
| H | 1.01708500  | -3.72152800 | -1.31105300 |
| H | -0.49568400 | -1.87542200 | -0.79237300 |
| H | 2.67103500  | 0.94050400  | -1.57386600 |
| H | 4.19712300  | -0.93327000 | -2.05834700 |



|    |             |             |             |
|----|-------------|-------------|-------------|
| H  | 3.40288600  | -3.29252700 | -1.89056900 |
| C  | 0.00653500  | 0.75746900  | -0.72706200 |
| C  | 0.33702600  | 2.05854000  | -0.47028300 |
| O  | -0.56276900 | 3.00916800  | -0.18489500 |
| O  | 1.58821100  | 2.50154100  | -0.46806800 |
| C  | 1.85842500  | 3.85539600  | -0.07197100 |
| H  | 2.94019200  | 3.95739200  | -0.14629500 |
| H  | 1.36967300  | 4.56153100  | -0.74595100 |
| H  | 1.53794000  | 4.02779300  | 0.95770000  |
| H  | -1.45749700 | 2.63425900  | -0.22029600 |
| Cu | 3.32480800  | -0.53122000 | 0.39896000  |
| Cl | 4.02997800  | -0.51679100 | 2.44767100  |
| C  | -2.24791100 | 0.39952800  | -1.84469000 |
| C  | -3.57944600 | 0.08145200  | -1.80589900 |
| C  | -4.20086900 | -0.23959200 | -0.56599100 |
| C  | -3.42700300 | -0.24036700 | 0.62762700  |
| C  | -2.03938200 | 0.08907700  | 0.54172100  |
| C  | -1.44931400 | 0.41910800  | -0.66663900 |
| H  | -6.17304700 | -0.56526200 | -1.39300100 |
| H  | -1.76890900 | 0.64377300  | -2.78899500 |
| H  | -4.17400700 | 0.07291000  | -2.71500700 |
| C  | -5.58152300 | -0.56525100 | -0.48121300 |
| C  | -4.04540600 | -0.56224300 | 1.86422600  |
| C  | -5.38430300 | -0.87052100 | 1.91127400  |
| C  | -6.15998800 | -0.87162200 | 0.72690300  |
| H  | -3.45000500 | -0.56065800 | 2.77115900  |
| H  | -5.85252600 | -1.11286300 | 2.86049200  |
| H  | -7.21699900 | -1.11566800 | 0.77816400  |
| O  | -1.34124200 | 0.05881300  | 1.70127300  |
| H  | -0.41157900 | 0.26768300  | 1.51859200  |

Structure and coordinates of 1'-Int-p5.log

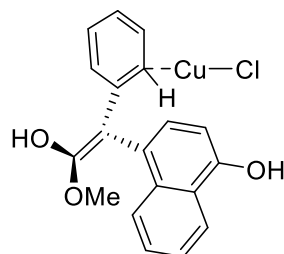

|   |             |            |             |
|---|-------------|------------|-------------|
| C | -0.98922700 | 2.58288400 | 1.17934500  |
| C | -0.26944700 | 1.42599300 | 0.86527500  |
| C | -0.61625900 | 0.60943600 | -0.22001000 |
| C | -1.72405600 | 1.02000800 | -1.01512500 |
| C | -2.44939000 | 2.18626300 | -0.69297400 |

|    |             |             |             |
|----|-------------|-------------|-------------|
| C  | -2.08427400 | 2.96849800  | 0.41852300  |
| H  | -0.68347700 | 3.18123300  | 2.03224400  |
| H  | 0.58003100  | 1.15658000  | 1.48406300  |
| H  | -1.94422700 | 0.50201600  | -1.94066200 |
| H  | -3.22831100 | 2.53047400  | -1.36844600 |
| H  | -2.63971200 | 3.86993500  | 0.65528300  |
| C  | 0.20150800  | -0.58957200 | -0.51794600 |
| C  | -0.23557100 | -1.63289300 | -1.25705300 |
| O  | 0.53221600  | -2.73082400 | -1.43939100 |
| O  | -1.43896600 | -1.67585800 | -1.86538300 |
| C  | -2.36326000 | -2.63791900 | -1.32245500 |
| H  | -3.32520100 | -2.42984700 | -1.79038500 |
| H  | -2.05710100 | -3.66152100 | -1.55960000 |
| H  | -2.44346100 | -2.51256500 | -0.23842000 |
| Cu | -3.37055400 | 0.44974600  | 0.23651300  |
| Cl | -4.77487400 | -0.74697600 | 1.36468300  |
| C  | 1.77102600  | -1.55275300 | 1.15279000  |
| C  | 1.55555300  | -0.68601100 | 0.10665800  |
| C  | 2.63785000  | 0.14308700  | -0.33409800 |
| C  | 3.90351300  | 0.06244100  | 0.31627000  |
| C  | 4.06770400  | -0.85997900 | 1.39371800  |
| C  | 3.02213200  | -1.65308200 | 1.79979000  |
| H  | 1.54200700  | 1.13392600  | -1.92005000 |
| H  | 0.95524900  | -2.18120500 | 1.49902600  |
| C  | 2.49743100  | 1.06378900  | -1.40930100 |
| C  | 4.97262600  | 0.89107200  | -0.11599100 |
| C  | 4.79735900  | 1.77380900  | -1.15391200 |
| C  | 3.54536800  | 1.85849700  | -1.80710900 |
| H  | 5.93133300  | 0.81653000  | 0.38609100  |
| H  | 5.61886700  | 2.40659400  | -1.47608800 |
| H  | 3.41353600  | 2.55750200  | -2.62784400 |
| O  | 5.29463900  | -0.89791000 | 1.97671200  |
| H  | 5.29584900  | -1.54000100 | 2.69812800  |
| H  | 0.20424800  | -3.22352700 | -2.20510200 |
| H  | 3.15266600  | -2.35481500 | 2.61939400  |

Structure and coordinates of 1'-Int-o5\*.log

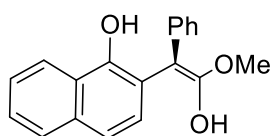

|   |            |             |             |
|---|------------|-------------|-------------|
| C | 4.28403200 | -1.61703800 | -0.35964300 |
| C | 3.35953700 | -0.62892100 | -0.69120800 |
| C | 2.13040700 | -0.53623900 | -0.02113100 |

|   |             |             |             |
|---|-------------|-------------|-------------|
| C | 1.84657300  | -1.48733800 | 0.97093300  |
| C | 2.76711300  | -2.47892200 | 1.29929700  |
| C | 3.99427200  | -2.54632600 | 0.63891600  |
| H | 5.23045100  | -1.66621000 | -0.89060600 |
| H | 3.59116400  | 0.08004500  | -1.48137200 |
| H | 0.89383800  | -1.44407300 | 1.49173800  |
| H | 2.52546400  | -3.20006200 | 2.07488400  |
| H | 4.71334300  | -3.31858100 | 0.89507900  |
| C | -3.66479000 | 0.69410300  | 1.11742500  |
| C | -2.63407100 | 0.16010800  | 0.29533600  |
| C | -4.95790200 | 0.24051300  | 1.01742800  |
| C | -1.27218600 | 0.59753400  | 0.37187900  |
| C | -2.97086100 | -0.86119600 | -0.64029500 |
| C | -5.29094200 | -0.77208700 | 0.08795900  |
| H | -5.72815000 | 0.66285700  | 1.65526800  |
| C | -0.29949800 | 0.06390700  | -0.45540900 |
| C | -1.95820800 | -1.41148700 | -1.46961000 |
| C | -4.31816400 | -1.30620900 | -0.71977300 |
| H | -6.31595700 | -1.12268600 | 0.01541600  |
| C | -0.67046000 | -0.95720300 | -1.36961100 |
| H | -2.22033200 | -2.18907900 | -2.18104200 |
| H | -4.56443800 | -2.08383000 | -1.43792700 |
| H | 0.10341100  | -1.37750900 | -2.00612600 |
| H | -3.45814500 | 1.47714100  | 1.84209200  |
| C | 1.12305600  | 0.49484100  | -0.37161700 |
| C | 1.44229600  | 1.77774800  | -0.64463900 |
| O | 0.55132000  | 2.60895700  | -1.22132000 |
| O | 2.62244100  | 2.40118900  | -0.44315600 |
| C | 3.30500100  | 2.21045000  | 0.80263600  |
| H | 3.79615500  | 3.15912500  | 1.02447800  |
| H | 2.59300100  | 1.96240400  | 1.59364000  |
| H | 4.05492900  | 1.42102400  | 0.71868600  |
| H | 0.84560400  | 3.51943000  | -1.07814400 |
| O | -0.88953700 | 1.55075100  | 1.26257500  |
| H | -1.62535600 | 1.81539900  | 1.82591700  |

Structure and coordinates of 1'-Int-p5\*.log

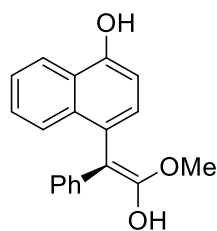

|   |             |            |            |
|---|-------------|------------|------------|
| C | -2.26159300 | 2.14450700 | 1.92762000 |
|---|-------------|------------|------------|

|   |             |             |             |
|---|-------------|-------------|-------------|
| C | -1.52456700 | 1.03132800  | 1.52787800  |
| C | -1.76404100 | 0.41458200  | 0.29177800  |
| C | -2.74929100 | 0.96626600  | -0.54174200 |
| C | -3.48913900 | 2.07545000  | -0.14210000 |
| C | -3.25045600 | 2.67040100  | 1.09690400  |
| H | -2.06124400 | 2.60356200  | 2.89149500  |
| H | -0.75311600 | 0.63537600  | 2.18268300  |
| H | -2.93009700 | 0.52295600  | -1.51688500 |
| H | -4.24577200 | 2.48245300  | -0.80687000 |
| H | -3.82223700 | 3.53992000  | 1.40705400  |
| C | -0.94196800 | -0.74388400 | -0.14403500 |
| C | -1.45777600 | -1.78552300 | -0.83068400 |
| O | -2.76167100 | -2.06492500 | -1.05340800 |
| C | -3.66608200 | -2.06763300 | 0.05951500  |
| H | -4.42979700 | -2.80977500 | -0.17666500 |
| H | -3.14220800 | -2.34962400 | 0.97691200  |
| H | -4.13375700 | -1.08872600 | 0.18606500  |
| C | 1.02511000  | -1.66763200 | 1.06622800  |
| C | 0.51394600  | -0.74181300 | 0.18517400  |
| C | 1.40553600  | 0.23097500  | -0.37672700 |
| C | 2.78258900  | 0.23038400  | -0.00904200 |
| C | 3.25231100  | -0.75832000 | 0.90671300  |
| C | 2.39024300  | -1.69155000 | 1.42808100  |
| H | -0.07229800 | 1.21400400  | -1.62043400 |
| H | 0.35855900  | -2.40790800 | 1.49999000  |
| C | 0.96869000  | 1.20608200  | -1.31570300 |
| C | 3.66219800  | 1.19758300  | -0.56320600 |
| C | 3.20018100  | 2.13147700  | -1.45792500 |
| C | 1.83874400  | 2.13072700  | -1.84011800 |
| H | 4.70711600  | 1.18587200  | -0.27226600 |
| H | 3.88006500  | 2.86775800  | -1.87586400 |
| H | 1.48007000  | 2.86487600  | -2.55547200 |
| O | 4.57576400  | -0.71580800 | 1.21755300  |
| H | 4.79101300  | -1.42908100 | 1.83237000  |
| O | -0.66151000 | -2.69175700 | -1.43868900 |
| H | -1.20756200 | -3.44918800 | -1.69242000 |
| H | 2.75280300  | -2.44299600 | 2.12500700  |

Structure and coordinates of 1'-TS-o6-2w.log

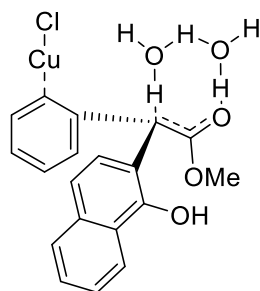

|   |             |             |             |
|---|-------------|-------------|-------------|
| C | 3.49192200  | -0.53127100 | -1.61497100 |
| C | 2.62381700  | 0.30323800  | -0.88099800 |
| C | 1.21936300  | 0.31928700  | -1.14306200 |
| C | 0.75961200  | -0.52674500 | -2.16531200 |
| C | 1.62694200  | -1.34383500 | -2.89557800 |
| C | 2.99029000  | -1.36533800 | -2.62698100 |
| H | 4.56228400  | -0.47100900 | -1.43770000 |
| H | 3.04489100  | 1.03017500  | -0.19210200 |
| H | -0.30022500 | -0.54444000 | -2.39942000 |
| H | 1.22119100  | -1.97300300 | -3.68241600 |
| H | 3.66091600  | -2.00331000 | -3.19270900 |
| C | 0.28727800  | 1.13631100  | -0.32786800 |
| C | 0.59377600  | 2.50293200  | -0.03190700 |
| O | -0.10927700 | 3.26901100  | 0.67358800  |
| O | 1.74834500  | 2.97584400  | -0.53530600 |
| C | 2.15602000  | 4.28218400  | -0.12304300 |
| H | 3.12092900  | 4.44741500  | -0.60284500 |
| H | 1.43988600  | 5.03705600  | -0.45500700 |
| H | 2.26600500  | 4.33355100  | 0.96345400  |
| O | -1.07803700 | 2.21365900  | 2.75972900  |
| H | -0.98630300 | 2.79742300  | 3.52567600  |
| H | -0.83935600 | 2.73308400  | 1.91541500  |
| O | 0.50461200  | 0.47546200  | 2.33805200  |
| H | 0.61002400  | 0.68893000  | 1.31924900  |
| H | -0.23356700 | 1.29592000  | 2.70280500  |
| H | 1.36827000  | 0.45120000  | 2.77629100  |
| C | -3.51344400 | -2.08061800 | 0.30537800  |
| C | -3.03201600 | -0.80171200 | -0.08386000 |
| C | -4.85377000 | -2.37753200 | 0.22196200  |
| C | -1.64345500 | -0.46586000 | -0.00118400 |
| C | -3.95248800 | 0.16876300  | -0.56327800 |
| C | -5.77284000 | -1.41304100 | -0.25602500 |
| H | -5.21100800 | -3.35782200 | 0.52385700  |
| C | -1.16989900 | 0.78418800  | -0.37735700 |
| C | -3.46189700 | 1.44184200  | -0.96257900 |
| C | -5.32961900 | -0.16973100 | -0.63977400 |

|    |             |             |             |
|----|-------------|-------------|-------------|
| H  | -6.82888800 | -1.65875700 | -0.32056500 |
| C  | -2.12567700 | 1.72080900  | -0.87382700 |
| H  | -4.15707000 | 2.18290400  | -1.34768500 |
| H  | -6.02950300 | 0.57561600  | -1.00905200 |
| H  | -1.76539700 | 2.69260600  | -1.19641000 |
| H  | -2.80990000 | -2.82067500 | 0.67080600  |
| Cu | 2.69042700  | -1.36314500 | 0.33915700  |
| Cl | 2.51038100  | -2.58088200 | 2.11268100  |
| O  | -0.84990900 | -1.47440800 | 0.44461100  |
| H  | 0.07860200  | -1.21044500 | 0.48340900  |

Structure and coordinates of 1'-TS-p6-2w.log

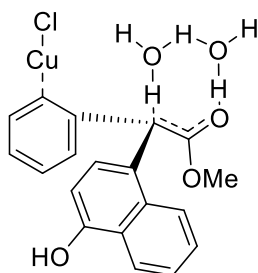

|   |             |             |             |
|---|-------------|-------------|-------------|
| C | -3.32054300 | 0.47221900  | 1.43683000  |
| C | -2.25782100 | 0.96983000  | 0.65444600  |
| C | -0.90102200 | 0.75091200  | 1.02968500  |
| C | -0.67895100 | -0.00033000 | 2.19017900  |
| C | -1.73283300 | -0.51296100 | 2.95505800  |
| C | -3.05340100 | -0.28822700 | 2.59243800  |
| H | -4.34362800 | 0.75256200  | 1.19639800  |
| H | -2.47793500 | 1.63405300  | -0.17657900 |
| H | 0.34088200  | -0.18787400 | 2.51152000  |
| H | -1.50748200 | -1.08571400 | 3.85005500  |
| H | -3.87173300 | -0.67211100 | 3.19250500  |
| C | 0.22687100  | 1.25755300  | 0.20569300  |
| C | 0.25342600  | 2.64001000  | -0.15458900 |
| O | 1.13833000  | 3.20927600  | -0.84703600 |
| O | -0.79703100 | 3.37688900  | 0.25766500  |
| C | -0.91120500 | 4.70318200  | -0.25882500 |
| H | -1.83748800 | 5.09777700  | 0.16018700  |
| H | -0.06788000 | 5.32226500  | 0.05621000  |
| H | -0.96973500 | 4.69450500  | -1.35086100 |
| O | 2.07847800  | 1.80948000  | -2.70909600 |
| H | 2.25520200  | 2.33770700  | -3.50004300 |
| H | 1.86712400  | 2.43632700  | -1.92351900 |
| O | 0.01085600  | 0.63282600  | -2.47865200 |
| H | -0.08409100 | 0.82827100  | -1.45034000 |
| H | 1.01808600  | 1.17737000  | -2.74382500 |

|    |             |             |             |
|----|-------------|-------------|-------------|
| H  | -0.75239700 | 1.00844700  | -2.94324200 |
| Cu | -2.92695600 | -0.88401400 | -0.19221300 |
| Cl | -3.20164300 | -2.41900400 | -1.69306900 |
| C  | 1.55642900  | 0.57734900  | 0.37323100  |
| C  | 1.73500900  | -0.82181800 | 0.07700400  |
| C  | 2.65078900  | 1.26892100  | 0.85243100  |
| C  | 0.67585300  | -1.64947800 | -0.39207800 |
| C  | 3.00741900  | -1.44096600 | 0.26959100  |
| C  | 3.91932700  | 0.67580500  | 1.02554300  |
| H  | 2.54681100  | 2.31892600  | 1.10599400  |
| C  | 0.85943700  | -2.98543900 | -0.65071500 |
| H  | -0.30813500 | -1.22103000 | -0.54538200 |
| C  | 3.17597900  | -2.82435600 | -0.00670800 |
| C  | 4.09955500  | -0.65414200 | 0.74011200  |
| H  | 4.74796500  | 1.27396200  | 1.39692800  |
| C  | 2.12455000  | -3.58492000 | -0.45543200 |
| H  | 0.02559600  | -3.58252000 | -1.00817900 |
| H  | 4.15187000  | -3.27297700 | 0.14550500  |
| H  | 2.26265700  | -4.64230000 | -0.66031600 |
| O  | 5.29247100  | -1.29197300 | 0.89265300  |
| H  | 5.95591900  | -0.66902600 | 1.21571000  |

Structure and coordinates of 1'-Int-p7.log

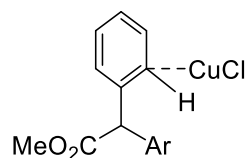

|    |             |             |             |
|----|-------------|-------------|-------------|
| C  | -3.11313700 | 1.47704500  | 0.57920900  |
| C  | -2.00588600 | 1.42987200  | -0.29168300 |
| C  | -0.70065800 | 1.24981600  | 0.22221800  |
| C  | -0.52989500 | 1.11864400  | 1.59392500  |
| C  | -1.62953300 | 1.16198900  | 2.46160400  |
| C  | -2.91413700 | 1.33491500  | 1.96695700  |
| H  | -4.09960200 | 1.71655100  | 0.19106800  |
| H  | -2.13887400 | 1.64124700  | -1.35130500 |
| H  | 0.46719400  | 0.98079500  | 2.00083600  |
| H  | -1.47029100 | 1.05544300  | 3.52997000  |
| H  | -3.76438500 | 1.37321800  | 2.63988200  |
| C  | 0.47075000  | 1.24094100  | -0.75200200 |
| Cu | -2.87778000 | -0.54243500 | -0.17914800 |
| Cl | -3.52714700 | -2.58158600 | -0.52066800 |
| C  | 1.65421100  | 0.39964700  | -0.28885400 |
| C  | 1.55171400  | -1.03191000 | -0.31870300 |
| C  | 2.81616400  | 0.96786300  | 0.17442400  |

|   |             |             |             |
|---|-------------|-------------|-------------|
| C | 0.37994800  | -1.71095500 | -0.75326100 |
| C | 2.65310800  | -1.82803200 | 0.11340300  |
| C | 3.91484900  | 0.19070600  | 0.60569500  |
| H | 2.92059700  | 2.04739100  | 0.22523500  |
| C | 0.30838200  | -3.08305400 | -0.76517900 |
| H | -0.49181800 | -1.14490700 | -1.06894200 |
| C | 2.55916200  | -3.24377800 | 0.08438400  |
| C | 3.83949100  | -1.17871900 | 0.57393000  |
| H | 4.81544200  | 0.68415300  | 0.96029400  |
| C | 1.41051900  | -3.86123500 | -0.34770500 |
| H | -0.60744300 | -3.56690400 | -1.09035000 |
| H | 3.40876000  | -3.83309800 | 0.41216600  |
| H | 1.34453300  | -4.94485800 | -0.36349900 |
| O | 4.85637700  | -1.98628300 | 0.97024300  |
| H | 5.60808800  | -1.45226900 | 1.25847100  |
| H | 0.11233900  | 0.83114400  | -1.70124900 |
| C | 0.90979100  | 2.65562100  | -1.12064600 |
| O | 1.27628600  | 2.97297800  | -2.23343000 |
| O | 0.86122900  | 3.49859900  | -0.09106000 |
| C | 1.28992800  | 4.84594300  | -0.33950600 |
| H | 2.33204300  | 4.86031600  | -0.66695200 |
| H | 0.65658300  | 5.31204700  | -1.09739800 |
| H | 1.18419300  | 5.36303100  | 0.61312300  |

Structure and coordinates of Pro-p8.log

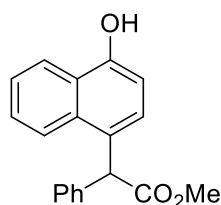

|   |             |             |             |
|---|-------------|-------------|-------------|
| C | -4.31193600 | -1.92065500 | -0.21088100 |
| C | -3.42030700 | -1.02664600 | -0.79440600 |
| C | -2.14758000 | -0.82038700 | -0.24813700 |
| C | -1.78287200 | -1.53494300 | 0.89272900  |
| C | -2.67558700 | -2.43454600 | 1.47948200  |
| C | -3.94095700 | -2.63013500 | 0.93268100  |
| H | -5.29386800 | -2.06712700 | -0.65108200 |
| H | -3.71350100 | -0.47979400 | -1.68811600 |
| H | -0.80024200 | -1.39866400 | 1.33312300  |
| H | -2.37539900 | -2.98330500 | 2.36735300  |
| H | -4.63289800 | -3.33140000 | 1.38940900  |
| C | -1.22224000 | 0.16761400  | -0.95284900 |
| C | -1.76923500 | 1.59289800  | -0.93125400 |



|   |             |             |             |
|---|-------------|-------------|-------------|
| O | -1.67920000 | 2.36006900  | -1.86819600 |
| O | -2.32881200 | 1.91598400  | 0.23399500  |
| C | -2.82256100 | 3.25700500  | 0.36142100  |
| H | -3.23822300 | 3.32045800  | 1.36601100  |
| H | -2.00865000 | 3.97573000  | 0.24188900  |
| H | -3.59921000 | 3.44807600  | -0.38230000 |
| H | -1.20438800 | -0.09896300 | -2.01335900 |
| C | 3.52334900  | -1.22216400 | -1.51198800 |
| C | 2.52792400  | -0.53402300 | -0.76531300 |
| C | 4.82912800  | -1.25238400 | -1.09116100 |
| C | 1.17765000  | -0.49768400 | -1.20159800 |
| C | 2.90877000  | 0.12944900  | 0.43722200  |
| C | 5.20526700  | -0.59172100 | 0.10220600  |
| H | 5.57770500  | -1.78275000 | -1.67174700 |
| C | 0.22134100  | 0.16485500  | -0.47065700 |
| C | 1.88808700  | 0.81323300  | 1.16963800  |
| C | 4.26857100  | 0.08133900  | 0.84811500  |
| H | 6.23962300  | -0.61868200 | 0.43031700  |
| C | 0.58733100  | 0.82528900  | 0.72763700  |
| H | 4.59745100  | 0.57278400  | 1.76015300  |
| H | -0.15669700 | 1.34615400  | 1.32149500  |
| H | 3.22788500  | -1.72678700 | -2.42776700 |
| H | 0.91119600  | -1.00502800 | -2.12495000 |
| O | 2.14799600  | 1.47325200  | 2.32873900  |
| H | 3.08448900  | 1.43649500  | 2.55594000  |

#### Structure and coordinates of React-CuCl2.log

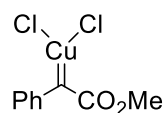

|   |            |             |             |
|---|------------|-------------|-------------|
| C | 2.45940900 | -2.62337700 | 0.04199700  |
| C | 1.34339400 | -1.82192600 | -0.08180000 |
| C | 1.47577300 | -0.40692700 | -0.18658900 |
| C | 2.78029800 | 0.16973300  | -0.16496700 |
| C | 3.88984500 | -0.64040900 | -0.04195000 |
| C | 3.72690500 | -2.02907800 | 0.06434000  |
| H | 2.35814800 | -3.69952600 | 0.12503300  |
| H | 0.34474000 | -2.24917300 | -0.10957400 |
| H | 2.90247200 | 1.24545300  | -0.24519500 |
| H | 4.88394600 | -0.20824500 | -0.02315500 |
| H | 4.60630400 | -2.65812100 | 0.16509300  |
| C | 0.31234400 | 0.36486300  | -0.30172400 |
| C | 0.40876000 | 1.82202800  | -0.55379200 |
| O | 0.42430300 | 2.21500200  | -1.70540800 |

|    |             |             |             |
|----|-------------|-------------|-------------|
| O  | 0.42510300  | 2.57241800  | 0.52810500  |
| C  | 0.43736500  | 4.00145600  | 0.32187500  |
| H  | 0.42693200  | 4.43312800  | 1.32045200  |
| H  | 1.34213200  | 4.29568500  | -0.21325600 |
| H  | -0.45001000 | 4.30646200  | -0.23573100 |
| Cu | -1.47393400 | -0.38922000 | -0.19934400 |
| Cl | -3.34899600 | -1.31367500 | -0.88231300 |
| Cl | -1.44337900 | -0.18607900 | 2.04886600  |

Structure and coordinates of 2-TS-p1.log

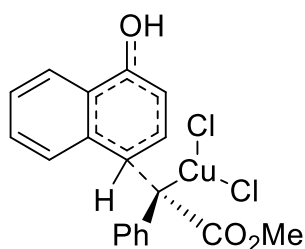

|    |             |             |             |
|----|-------------|-------------|-------------|
| C  | 1.56072000  | -1.52753800 | 2.40707700  |
| C  | 0.50963600  | -1.16743400 | 1.57169700  |
| C  | 0.33100500  | 0.17895700  | 1.16906300  |
| C  | 1.25790600  | 1.14915000  | 1.63831800  |
| C  | 2.30155100  | 0.78330400  | 2.46396900  |
| C  | 2.45957900  | -0.55809600 | 2.84352900  |
| H  | 1.68133900  | -2.56310500 | 2.70706400  |
| H  | -0.19390400 | -1.92213100 | 1.23533800  |
| H  | 1.15261100  | 2.18780700  | 1.34079100  |
| H  | 3.00577900  | 1.53152200  | 2.81258200  |
| H  | 3.28513000  | -0.83950000 | 3.49053800  |
| C  | -0.72873300 | 0.52449300  | 0.27215700  |
| C  | -1.03604700 | 1.98184000  | 0.08542600  |
| O  | -0.79687100 | 2.68893400  | -0.86918500 |
| O  | -1.68435400 | 2.39372200  | 1.17743200  |
| C  | -2.20118600 | 3.73445900  | 1.15082200  |
| H  | -2.69200100 | 3.87128900  | 2.11335100  |
| H  | -1.38902900 | 4.45513900  | 1.03283400  |
| H  | -2.92236500 | 3.84262000  | 0.33791800  |
| Cu | -2.27476900 | -0.68215000 | 0.03436900  |
| Cl | -3.11404400 | -2.68580100 | 0.53965300  |
| Cl | -3.67509200 | 0.57123600  | -1.20207800 |
| C  | 0.86825300  | -2.21652700 | -1.41942100 |
| C  | 2.13662800  | -1.89279800 | -0.95076300 |
| C  | 2.62870800  | -0.54233200 | -0.99889500 |
| C  | 1.75063700  | 0.46901100  | -1.47702200 |
| C  | 0.40433900  | 0.13346400  | -1.83125300 |

|   |             |             |             |
|---|-------------|-------------|-------------|
| C | 0.02725800  | -1.21187300 | -1.88076600 |
| H | 4.63897700  | -0.93751400 | -0.22787800 |
| H | 0.55130100  | -3.25351700 | -1.40604000 |
| C | 3.94015500  | -0.19219000 | -0.59784500 |
| C | 2.21634400  | 1.80070400  | -1.53872300 |
| H | -0.22424400 | 0.88980700  | -2.28573700 |
| H | -0.95794000 | -1.47314500 | -2.25683100 |
| C | 3.49993500  | 2.11756400  | -1.14809300 |
| C | 4.36793200  | 1.11516400  | -0.67373900 |
| H | 1.53830300  | 2.57059400  | -1.89128200 |
| H | 3.84564700  | 3.14498800  | -1.20713800 |
| H | 5.37713300  | 1.37159800  | -0.36805500 |
| O | 2.87948900  | -2.90849800 | -0.49872300 |
| H | 3.73304500  | -2.61569700 | -0.15237100 |

Structure and coordinates of 2-TS-o1.log

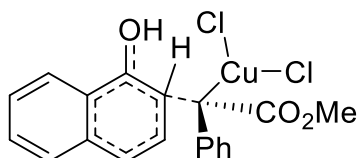

|    |             |             |             |
|----|-------------|-------------|-------------|
| C  | -1.91052100 | 0.55617700  | -2.47582100 |
| C  | -0.88292600 | 0.12243900  | -1.65732400 |
| C  | -0.19944200 | 1.02291900  | -0.80240600 |
| C  | -0.63156400 | 2.37311500  | -0.77733200 |
| C  | -1.66747700 | 2.80247000  | -1.59287800 |
| C  | -2.30669600 | 1.89611800  | -2.44099000 |
| H  | -2.41244900 | -0.14583400 | -3.13321400 |
| H  | -0.58354000 | -0.92140500 | -1.68334900 |
| H  | -0.14192800 | 3.08322500  | -0.11894200 |
| H  | -1.98233900 | 3.84047300  | -1.56584200 |
| H  | -3.11636700 | 2.23495700  | -3.08037700 |
| C  | 0.88533200  | 0.56241900  | 0.01846700  |
| C  | 1.85361500  | 1.59182800  | 0.54252400  |
| O  | 2.15570800  | 1.81439000  | 1.69486900  |
| O  | 2.40454500  | 2.20956100  | -0.50388700 |
| C  | 3.49255600  | 3.10144400  | -0.21572000 |
| H  | 3.83661500  | 3.45923400  | -1.18513900 |
| H  | 3.14510800  | 3.93661000  | 0.39680100  |
| H  | 4.29446700  | 2.56799700  | 0.29918800  |
| Cu | 1.70186300  | -1.21102900 | -0.36302300 |
| Cl | 1.02240000  | -3.26042400 | -1.01778000 |
| Cl | 3.87555200  | -0.81927800 | -0.09265400 |
| C  | -0.11304300 | 0.13347700  | 2.13876300  |

|   |             |             |             |
|---|-------------|-------------|-------------|
| C | -0.79536700 | -0.98174100 | 1.63650700  |
| C | -2.09303800 | -0.84021700 | 1.06212900  |
| C | -2.71589200 | 0.43950500  | 1.14677900  |
| C | -2.06615200 | 1.51840300  | 1.83373600  |
| C | -0.81027400 | 1.36029400  | 2.33271000  |
| H | -2.29954000 | -2.87802100 | 0.30561000  |
| H | 0.84714300  | -0.03048900 | 2.61362200  |
| C | -2.75332900 | -1.89449200 | 0.38428900  |
| C | -3.97972300 | 0.61831800  | 0.54313900  |
| H | -2.59479900 | 2.46094400  | 1.93757500  |
| H | -0.29723300 | 2.17650700  | 2.82810200  |
| C | -4.59544000 | -0.41886600 | -0.12427500 |
| C | -3.97950700 | -1.68470700 | -0.20464600 |
| H | -4.45615000 | 1.59219900  | 0.60523200  |
| H | -5.56258000 | -0.26352000 | -0.59261300 |
| H | -4.47250100 | -2.49520900 | -0.73123600 |
| O | -0.15113400 | -2.14824200 | 1.72324100  |
| H | -0.48274900 | -2.82197800 | 1.10993600  |

Structure and coordinates of 2-Int-p2.log

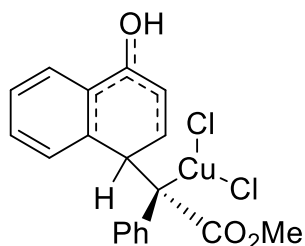

|   |             |             |             |
|---|-------------|-------------|-------------|
| C | 0.77751900  | -2.15286100 | 2.46265000  |
| C | 0.11779500  | -1.55909300 | 1.38722500  |
| C | 0.14734400  | -0.17230100 | 1.19058800  |
| C | 0.87157400  | 0.60473400  | 2.10960500  |
| C | 1.53500700  | 0.01599000  | 3.18125600  |
| C | 1.49141600  | -1.36710500 | 3.36360200  |
| H | 0.72469300  | -3.22933200 | 2.59613200  |
| H | -0.43718000 | -2.18949800 | 0.69816500  |
| H | 0.92971900  | 1.68081900  | 1.98010800  |
| H | 2.09207900  | 0.64026600  | 3.87385700  |
| H | 2.00527200  | -1.82535700 | 4.20338200  |
| C | -0.93835500 | 1.86158000  | 0.09190100  |
| O | -0.84587900 | 2.72222400  | -0.76770500 |
| O | -1.54397700 | 2.08788300  | 1.26735900  |
| C | -2.12006100 | 3.38545200  | 1.45180300  |
| H | -2.58123200 | 3.35841000  | 2.43839000  |
| H | -1.34781000 | 4.15780100  | 1.41686700  |

|    |             |             |             |
|----|-------------|-------------|-------------|
| H  | -2.87533600 | 3.58206200  | 0.68716100  |
| C  | -0.47698600 | 0.44433300  | -0.03975100 |
| Cu | -2.29370400 | -0.45435700 | -0.28888000 |
| C  | 4.19973500  | 0.05638300  | -0.52730100 |
| C  | 2.89036300  | -0.29739100 | -0.91565000 |
| C  | 4.49920200  | 1.37651100  | -0.25991000 |
| C  | 2.57990800  | -1.65169500 | -1.27332900 |
| C  | 1.87011700  | 0.67456600  | -1.01338100 |
| C  | 3.50166500  | 2.35124300  | -0.39707000 |
| H  | 5.50336500  | 1.65923700  | 0.03736400  |
| C  | 1.30978900  | -2.02925700 | -1.78467000 |
| C  | 0.44835600  | 0.27121100  | -1.30717000 |
| C  | 2.20767400  | 2.00744200  | -0.76498200 |
| H  | 3.74025100  | 3.39407600  | -0.21139300 |
| C  | 0.31513600  | -1.11331200 | -1.81194000 |
| H  | 1.15450300  | -3.05019000 | -2.11945700 |
| H  | 0.01749300  | 0.94591500  | -2.05951200 |
| H  | 1.44811600  | 2.77443700  | -0.85715500 |
| H  | -0.66183200 | -1.40341700 | -2.18856800 |
| H  | 4.96543600  | -0.70769500 | -0.45350600 |
| O  | 3.53627000  | -2.53142700 | -1.14655000 |
| H  | 3.25534400  | -3.42106000 | -1.42353300 |
| Cl | -2.91605700 | 0.24690200  | -2.33120200 |
| Cl | -3.66923400 | -1.87385100 | 0.80611600  |

Structure and coordinates of 2-Int-o2.log

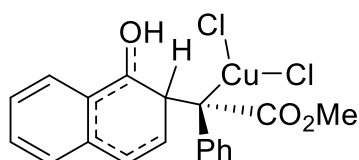

|   |             |             |             |
|---|-------------|-------------|-------------|
| C | -0.97258300 | 2.05049000  | -2.36777000 |
| C | -0.23330100 | 1.10370100  | -1.66212700 |
| C | 0.02502700  | 1.25875900  | -0.29444300 |
| C | -0.48080500 | 2.39799400  | 0.34732300  |
| C | -1.21896100 | 3.34814000  | -0.35496600 |
| C | -1.47061500 | 3.17674800  | -1.71594300 |
| H | -1.15105400 | 1.90809400  | -3.42951700 |
| H | 0.16134300  | 0.23915600  | -2.18723400 |
| H | -0.30056400 | 2.54494300  | 1.40818300  |
| H | -1.59918100 | 4.22351700  | 0.16339900  |
| H | -2.04447900 | 3.91786200  | -2.26440200 |
| C | 1.67327200  | 0.60119500  | 1.55572700  |
| O | 1.90581800  | -0.02328200 | 2.58029100  |

|    |             |             |             |
|----|-------------|-------------|-------------|
| O  | 2.31233000  | 1.73310000  | 1.23937400  |
| C  | 3.36288300  | 2.13974600  | 2.12232500  |
| H  | 3.76034800  | 3.06022200  | 1.69594300  |
| H  | 2.97318000  | 2.32341500  | 3.12647300  |
| H  | 4.14344800  | 1.37598500  | 2.16224900  |
| C  | 0.71446200  | 0.16669300  | 0.49574800  |
| Cu | 2.11416700  | -0.85727000 | -0.61990900 |
| C  | -3.45606500 | -1.38069900 | -1.11193300 |
| C  | -2.64051100 | -1.03443500 | -0.00386800 |
| C  | -4.79459500 | -1.06445500 | -1.11131100 |
| C  | -1.25024200 | -1.31941600 | 0.02771600  |
| C  | -3.20805800 | -0.35458800 | 1.11166100  |
| C  | -5.35486100 | -0.40354900 | -0.00297100 |
| H  | -5.41485900 | -1.32147900 | -1.96264800 |
| C  | -0.34459900 | -0.83365400 | 1.10430300  |
| C  | -2.38977400 | 0.01015900  | 2.25053200  |
| C  | -4.57750700 | -0.05487300 | 1.08768000  |
| H  | -6.41307200 | -0.16130800 | -0.00609000 |
| C  | -1.06945800 | -0.21410800 | 2.25424900  |
| H  | 0.22000900  | -1.70595100 | 1.46591200  |
| H  | -2.87962000 | 0.47963300  | 3.09780700  |
| H  | -5.02151100 | 0.45631600  | 1.93572000  |
| H  | -0.45930400 | 0.06837300  | 3.10391700  |
| H  | -3.04928700 | -1.87661900 | -1.98891000 |
| Cl | 2.32535900  | -2.92075500 | 0.17777100  |
| Cl | 3.23807100  | 0.35938800  | -2.09215200 |
| O  | -0.65042600 | -2.00602300 | -0.89335100 |
| H  | -1.23855400 | -2.32155100 | -1.60104600 |

Structure and coordinates of 2-TS-p3.log

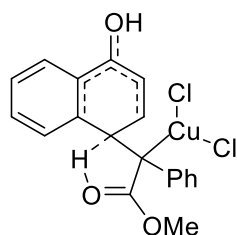

|   |             |            |             |
|---|-------------|------------|-------------|
| C | 0.51420600  | 3.04709700 | -1.59957900 |
| C | 0.13953400  | 1.80700400 | -1.10586000 |
| C | 0.69689300  | 1.29742300 | 0.09462400  |
| C | 1.64162300  | 2.10489900 | 0.77658600  |
| C | 2.00689700  | 3.34527400 | 0.27125500  |
| C | 1.45205900  | 3.82365700 | -0.91643900 |
| H | 0.07611200  | 3.40902600 | -2.52447400 |
| H | -0.58379400 | 1.21355200 | -1.65647300 |

|    |             |             |             |
|----|-------------|-------------|-------------|
| H  | 2.09250700  | 1.75019700  | 1.69405800  |
| H  | 2.73696100  | 3.94208000  | 0.80915800  |
| H  | 1.74929500  | 4.79139400  | -1.30816400 |
| C  | 0.54838000  | -0.62043000 | 1.86733500  |
| O  | -0.20261600 | -1.55706200 | 2.23149300  |
| O  | 1.52568000  | -0.18220600 | 2.61650700  |
| C  | 1.77806000  | -0.87214900 | 3.85860300  |
| H  | 2.64474900  | -0.37282700 | 4.28780900  |
| H  | 0.91501400  | -0.77976600 | 4.51995500  |
| H  | 1.99919900  | -1.92189700 | 3.65924600  |
| C  | 0.30521300  | -0.05298400 | 0.53858000  |
| Cu | 1.95191800  | -0.56415200 | -0.58949300 |
| H  | -0.95726300 | -1.46890500 | 1.08410600  |
| C  | -1.01832500 | -0.65230800 | 0.07118600  |
| C  | -2.25865600 | 0.08677900  | 0.34526700  |
| C  | -1.04580200 | -1.59276000 | -0.99476100 |
| C  | -2.32576200 | 1.09587100  | 1.32815900  |
| C  | -3.44434600 | -0.24456300 | -0.35582700 |
| C  | -2.20294300 | -1.93117200 | -1.66725600 |
| H  | -0.12248200 | -2.10782100 | -1.24459600 |
| C  | -3.51395100 | 1.74534000  | 1.59099900  |
| H  | -1.43307500 | 1.37395100  | 1.87916800  |
| C  | -4.65626200 | 0.42885300  | -0.07109300 |
| C  | -3.38846800 | -1.26531100 | -1.36119200 |
| H  | -2.19089700 | -2.70004900 | -2.43324200 |
| C  | -4.68927900 | 1.41286900  | 0.88953000  |
| H  | -3.54142700 | 2.52353800  | 2.34750500  |
| H  | -5.55546600 | 0.16087400  | -0.61459900 |
| H  | -5.61719300 | 1.93107000  | 1.10791200  |
| O  | -4.52763700 | -1.54313000 | -1.98320700 |
| H  | -4.40255800 | -2.24292900 | -2.64287100 |
| Cl | 3.46992600  | 0.10193100  | -2.10084400 |
| Cl | 2.29400600  | -2.72912000 | -0.02552500 |

Structure and coordinates of 2-TS-o3.log

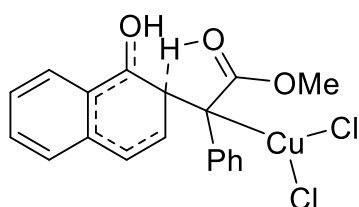

|   |             |            |             |
|---|-------------|------------|-------------|
| C | -1.02227700 | 3.62898600 | -0.01262500 |
| C | -0.47102700 | 2.36931200 | -0.20409700 |
| C | -1.26037900 | 1.28800700 | -0.65706700 |

|    |             |             |             |
|----|-------------|-------------|-------------|
| C  | -2.63278800 | 1.53098900  | -0.89606600 |
| C  | -3.17477700 | 2.79574300  | -0.69993000 |
| C  | -2.37756200 | 3.85159200  | -0.25855100 |
| H  | -0.39017900 | 4.43943500  | 0.33724600  |
| H  | 0.58306300  | 2.22046600  | 0.00834500  |
| H  | -3.27501300 | 0.72491400  | -1.22660900 |
| H  | -4.23235800 | 2.95383800  | -0.88771500 |
| H  | -2.80949000 | 4.83523400  | -0.10291700 |
| C  | -1.13805600 | -1.13037600 | -1.65257700 |
| O  | -0.30913900 | -1.99442100 | -2.02001900 |
| O  | -2.39305800 | -1.16896900 | -2.01251000 |
| C  | -2.83125700 | -2.31107100 | -2.77492100 |
| H  | -3.89117700 | -2.14106400 | -2.95456700 |
| H  | -2.28601500 | -2.36484200 | -3.71889600 |
| H  | -2.68213700 | -3.22225300 | -2.19351200 |
| C  | -0.64821800 | -0.05612900 | -0.77503100 |
| C  | 3.91593500  | -0.62802400 | 1.35898300  |
| C  | 3.09243400  | -0.24545100 | 0.26947200  |
| C  | 5.27164500  | -0.40114500 | 1.31700900  |
| C  | 1.67529400  | -0.43573600 | 0.27624000  |
| C  | 3.67514600  | 0.38379600  | -0.86649800 |
| C  | 5.85028300  | 0.21841400  | 0.19077000  |
| H  | 5.89680600  | -0.70156500 | 2.15097400  |
| C  | 0.87567300  | -0.14973200 | -0.86916800 |
| C  | 2.85804800  | 0.79677700  | -1.97463400 |
| C  | 5.06926100  | 0.60212800  | -0.87773400 |
| H  | 6.92118200  | 0.39455700  | 0.16756900  |
| C  | 1.52745400  | 0.56965300  | -1.96587200 |
| H  | 0.76438500  | -1.30103200 | -1.40939200 |
| H  | 3.33385600  | 1.29389800  | -2.81390200 |
| H  | 5.51674200  | 1.07924900  | -1.74412900 |
| H  | 0.90273700  | 0.86403900  | -2.80380100 |
| H  | 3.50830400  | -1.11397100 | 2.24116100  |
| Cu | -1.41904200 | -0.47492400 | 1.08615700  |
| Cl | -1.94957600 | -2.67050700 | 1.03569300  |
| Cl | -1.84187900 | 0.52591900  | 3.05408300  |
| O  | 1.02985900  | -0.91671600 | 1.31881800  |
| H  | 1.59596800  | -1.15565900 | 2.06887200  |

Structure and coordinates of 2-Int-p4.log



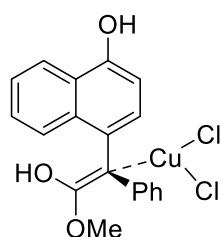

|    |             |             |             |
|----|-------------|-------------|-------------|
| C  | 1.36939600  | 3.17519200  | -1.32459600 |
| C  | 0.62814600  | 2.17130600  | -0.72036700 |
| C  | 1.18280400  | 1.35659700  | 0.30131900  |
| C  | 2.52779300  | 1.61053200  | 0.67922900  |
| C  | 3.25734700  | 2.61940500  | 0.06430600  |
| C  | 2.68857400  | 3.40553600  | -0.93753200 |
| H  | 0.91572200  | 3.77282300  | -2.10856700 |
| H  | -0.39340500 | 2.00438600  | -1.04206100 |
| H  | 2.99985300  | 1.02001100  | 1.45133800  |
| H  | 4.28447900  | 2.78912800  | 0.37136800  |
| H  | 3.27006700  | 4.18834200  | -1.41416400 |
| C  | 0.32843500  | 0.26866400  | 0.85712000  |
| C  | 0.70104500  | -0.53289700 | 1.96952900  |
| O  | -0.14717300 | -1.33931700 | 2.55668000  |
| O  | 1.89250500  | -0.52518000 | 2.47582000  |
| C  | 2.25280600  | -1.49080000 | 3.49385100  |
| H  | 3.30640100  | -1.30152900 | 3.68657200  |
| H  | 1.65971800  | -1.32094600 | 4.39317400  |
| H  | 2.10732700  | -2.49915800 | 3.10573000  |
| Cu | 1.42339100  | -0.64572500 | -0.75422700 |
| Cl | 2.22410900  | -0.41137100 | -2.81853300 |
| Cl | 1.80553400  | -2.75682500 | -0.04866400 |
| C  | -3.04183300 | 1.89282300  | 1.38852300  |
| C  | -3.90328600 | 1.20169800  | 0.56861700  |
| C  | -3.43921400 | 0.08715500  | -0.19721500 |
| C  | -2.06350200 | -0.30482600 | -0.09394600 |
| C  | -1.17211000 | 0.46406200  | 0.72766400  |
| C  | -1.69064800 | 1.52375900  | 1.44943900  |
| H  | -5.35030600 | -0.35354500 | -1.17003400 |
| C  | -4.30949700 | -0.64359400 | -1.05229800 |
| C  | -1.66205200 | -1.46594000 | -0.81305300 |
| H  | -1.02447200 | 2.11360200  | 2.07335600  |
| C  | -2.52824200 | -2.15662100 | -1.62207500 |
| C  | -3.86773600 | -1.73326900 | -1.75872300 |
| H  | -0.65589200 | -1.85186500 | -0.69911900 |
| H  | -2.17922100 | -3.03747300 | -2.15172900 |
| H  | -4.54763600 | -2.27566700 | -2.40770200 |
| O  | -5.18800000 | 1.62511200  | 0.53696300  |

|   |             |             |             |
|---|-------------|-------------|-------------|
| H | -5.73464500 | 1.08231500  | -0.04351400 |
| H | -1.03587400 | -1.25332500 | 2.16642300  |
| H | -3.41240500 | 2.73063800  | 1.96941000  |

Structure and coordinates of 2-Int-o4.log

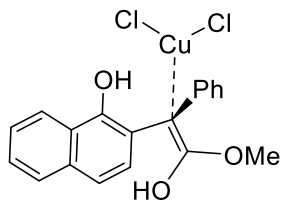

|    |             |             |             |
|----|-------------|-------------|-------------|
| C  | 1.81152400  | 3.89007700  | 0.27205100  |
| C  | 1.26319300  | 2.70016000  | 0.74407000  |
| C  | 1.59529200  | 1.47935100  | 0.13951200  |
| C  | 2.49137400  | 1.47033300  | -0.93650700 |
| C  | 3.03645400  | 2.66249400  | -1.40730000 |
| C  | 2.69846300  | 3.87344700  | -0.80456200 |
| H  | 1.54589900  | 4.82998600  | 0.74600300  |
| H  | 0.56430700  | 2.71437600  | 1.57614200  |
| H  | 2.75155800  | 0.52553300  | -1.40441000 |
| H  | 3.72602200  | 2.64266700  | -2.24565300 |
| H  | 3.12189300  | 4.80180200  | -1.17569000 |
| C  | 0.99283300  | 0.20997400  | 0.67878200  |
| C  | 1.89663600  | -0.62610400 | 1.37326400  |
| Cu | 0.39983600  | -1.29837000 | -0.74418800 |
| Cl | 2.35790300  | -2.25026500 | -1.34757600 |
| Cl | -1.30948000 | -2.20817100 | -1.85642200 |
| C  | -0.47456200 | 0.11373300  | 0.83820600  |
| C  | -1.34437600 | 0.74883000  | -0.08447000 |
| C  | -2.76738700 | 0.66993500  | 0.06194400  |
| C  | -3.31800600 | -0.02351500 | 1.16661300  |
| C  | -2.43552100 | -0.61753700 | 2.12107600  |
| C  | -1.08942100 | -0.54908100 | 1.96453800  |
| H  | -3.20842300 | 1.79440400  | -1.73581800 |
| C  | -3.63100500 | 1.27253900  | -0.88528300 |
| C  | -4.72237100 | -0.09348600 | 1.30346800  |
| H  | -2.85790500 | -1.11596800 | 2.98826600  |
| H  | -0.45136600 | -0.98982600 | 2.71700800  |
| C  | -5.54729400 | 0.49967800  | 0.37205700  |
| C  | -4.99670800 | 1.18534800  | -0.73099400 |
| H  | -5.14102400 | -0.62272300 | 2.15473900  |
| H  | -6.62536400 | 0.43728800  | 0.48479900  |
| H  | -5.65395900 | 1.64373500  | -1.46321900 |
| O  | -0.94482300 | 1.43789900  | -1.16097300 |
| H  | 0.01188700  | 1.59760700  | -1.16856500 |

|   |            |             |            |
|---|------------|-------------|------------|
| O | 1.48872600 | -1.71034800 | 1.99218900 |
| H | 2.20627100 | -2.30268500 | 2.27040500 |
| O | 3.15587300 | -0.29299800 | 1.37556500 |
| C | 4.16069900 | -1.17880800 | 1.90820500 |
| H | 5.10384500 | -0.66305600 | 1.74256100 |
| H | 4.00842400 | -1.32364100 | 2.98128800 |
| H | 4.16239700 | -2.12400400 | 1.35926300 |

Structure and coordinates of 2-Int-p5\*.log

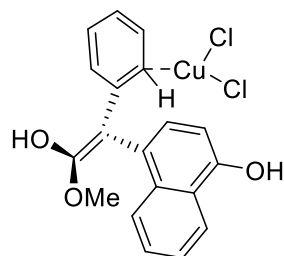

|    |             |             |             |
|----|-------------|-------------|-------------|
| C  | -2.84320800 | -0.05073200 | 1.96961000  |
| C  | -1.97496800 | 0.77866700  | 1.25654700  |
| C  | -0.55640400 | 0.57948200  | 1.34000200  |
| C  | -0.08905900 | -0.45206600 | 2.19370200  |
| C  | -0.96482900 | -1.25667300 | 2.90584100  |
| C  | -2.34267600 | -1.07622000 | 2.78521000  |
| H  | -3.91161400 | 0.13699200  | 1.92918600  |
| H  | -2.38173500 | 1.63329100  | 0.73614900  |
| H  | 0.97849800  | -0.60862400 | 2.29991500  |
| H  | -0.57262900 | -2.03243700 | 3.55495800  |
| H  | -3.02880600 | -1.71689900 | 3.32910200  |
| C  | 0.39971400  | 1.29775000  | 0.54510500  |
| C  | 1.08866700  | -1.28082700 | -0.79455700 |
| C  | 2.08677500  | -0.45968500 | -0.20527400 |
| C  | 1.40603700  | -2.49364900 | -1.35457200 |
| C  | 1.79077400  | 0.81079400  | 0.39583000  |
| C  | 3.43569000  | -0.91300900 | -0.24534600 |
| C  | 2.74400700  | -2.95046400 | -1.36515000 |
| H  | 0.62195500  | -3.09965600 | -1.79831700 |
| C  | 2.82788800  | 1.59131600  | 0.86599700  |
| C  | 4.46421900  | -0.07601300 | 0.28546800  |
| C  | 3.73955600  | -2.17161100 | -0.82794400 |
| H  | 2.98316200  | -3.91113300 | -1.81057400 |
| C  | 4.16511000  | 1.15656700  | 0.82180900  |
| H  | 4.77127600  | -2.50548900 | -0.84924700 |
| H  | 4.95368100  | 1.79014200  | 1.21822300  |
| H  | 0.05985700  | -0.93661900 | -0.81998200 |
| Cu | -2.53871900 | -0.62361400 | -0.40441800 |

|    |             |             |             |
|----|-------------|-------------|-------------|
| Cl | -3.19287500 | -2.76301400 | -0.59228400 |
| Cl | -2.01286100 | 0.83643400  | -2.09168300 |
| H  | 2.61259400  | 2.55804200  | 1.31342300  |
| O  | 5.72509100  | -0.56083300 | 0.22118100  |
| H  | 6.34877800  | 0.08064800  | 0.58694800  |
| C  | 0.06525500  | 2.47806200  | -0.18281800 |
| O  | 0.86996900  | 2.84338700  | -1.14343600 |
| H  | 0.60035000  | 3.65635300  | -1.60357200 |
| O  | -0.97124500 | 3.18186900  | 0.14430500  |
| C  | -1.46041700 | 4.24997500  | -0.70034200 |
| H  | -2.39854600 | 4.55620100  | -0.24387100 |
| H  | -0.75673500 | 5.08642400  | -0.69146500 |
| H  | -1.64302700 | 3.86409300  | -1.70640000 |

Structure and coordinates of 2-Int-o5\*.log

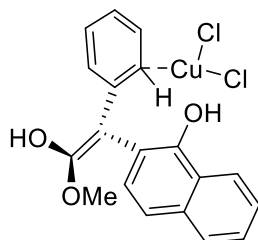

|   |             |             |             |
|---|-------------|-------------|-------------|
| C | 2.96785300  | -0.96196500 | -1.71402400 |
| C | 2.05157200  | 0.06406000  | -1.42482500 |
| C | 0.67298400  | -0.25074000 | -1.13729200 |
| C | 0.32405500  | -1.63652800 | -1.09643200 |
| C | 1.25092700  | -2.63228000 | -1.32917900 |
| C | 2.57994000  | -2.30945600 | -1.63370800 |
| H | 3.96523300  | -0.70635300 | -2.05985100 |
| H | 2.34390500  | 1.08576100  | -1.61459500 |
| H | -0.69649600 | -1.91212000 | -0.85769200 |
| H | 0.94898800  | -3.67225200 | -1.26554500 |
| H | 3.30857900  | -3.09178500 | -1.81592700 |
| C | -4.35002500 | -0.44331200 | 1.91661600  |
| C | -3.71004000 | -0.29310000 | 0.65561200  |
| C | -5.66118200 | -0.84642000 | 1.99697900  |
| C | -2.34717400 | 0.12435400  | 0.52082800  |
| C | -4.45214400 | -0.57101400 | -0.52928500 |
| C | -6.39864400 | -1.12209800 | 0.82128600  |
| H | -6.13419500 | -0.95500300 | 2.96795300  |
| C | -1.76741900 | 0.26416400  | -0.72511500 |
| C | -3.83438300 | -0.42689600 | -1.80048600 |
| C | -5.80621900 | -0.98670900 | -0.40937600 |
| H | -7.43425900 | -1.43914900 | 0.89817900  |
| C | -2.52941500 | -0.02049000 | -1.88730500 |

|    |             |             |             |
|----|-------------|-------------|-------------|
| H  | -4.40827400 | -0.64282500 | -2.69678400 |
| H  | -6.36524500 | -1.19571500 | -1.31760200 |
| H  | -2.05257600 | 0.08990200  | -2.85715600 |
| H  | -3.82163200 | -0.24285400 | 2.84526800  |
| Cu | 3.13168800  | -0.38916800 | 0.39691900  |
| Cl | 4.62785200  | -1.80661200 | 1.35683100  |
| Cl | 2.54832400  | 1.34028600  | 1.72789100  |
| C  | -0.34784200 | 0.70466600  | -0.86916000 |
| C  | -0.11726800 | 2.08568000  | -0.70692700 |
| O  | -1.12810600 | 2.82946800  | -0.31608100 |
| O  | 1.04272200  | 2.61815100  | -0.95629700 |
| C  | 1.35871300  | 3.96846000  | -0.56236100 |
| H  | 2.42288000  | 4.07607000  | -0.75871700 |
| H  | 0.80139700  | 4.68159600  | -1.17660400 |
| H  | 1.17000500  | 4.10284100  | 0.50495900  |
| H  | -0.91533700 | 3.77437800  | -0.24903800 |
| O  | -1.56691400 | 0.39498800  | 1.59268100  |
| H  | -2.03425100 | 0.25779400  | 2.42474700  |

Structure and coordinates of 2-TS-o6-2w.log

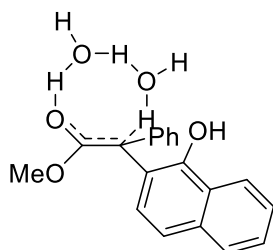

|   |             |             |             |
|---|-------------|-------------|-------------|
| C | -3.69605700 | 2.46645800  | 0.58745200  |
| C | -3.04913600 | 1.23571300  | 0.64889300  |
| C | -1.83884900 | 1.02167900  | -0.02500800 |
| C | -1.28288200 | 2.08393500  | -0.74419100 |
| C | -1.92479300 | 3.32090300  | -0.80087500 |
| C | -3.13513200 | 3.51716900  | -0.13989300 |
| H | -4.63520800 | 2.60843800  | 1.11446900  |
| H | -3.48949700 | 0.42722000  | 1.22733000  |
| H | -0.33649500 | 1.94967300  | -1.25905500 |
| H | -1.47305800 | 4.13300900  | -1.36321700 |
| H | -3.63392900 | 4.48069900  | -0.18426400 |
| C | -1.14610200 | -0.31748400 | 0.07894100  |
| C | -1.85685200 | -1.44252500 | -0.46531400 |
| O | -1.44220600 | -2.66063800 | -0.38130100 |
| O | -3.01769800 | -1.26408000 | -1.02570300 |
| C | -3.81932400 | -2.41340000 | -1.37783600 |
| H | -4.75031600 | -1.99505300 | -1.75458200 |

|   |             |             |             |
|---|-------------|-------------|-------------|
| H | -3.31987900 | -2.99456000 | -2.15392600 |
| H | -4.00193600 | -3.02661400 | -0.49426100 |
| O | 0.16513700  | -3.04552000 | 1.50043700  |
| H | 0.08713400  | -3.92137000 | 1.89830800  |
| H | -0.68798800 | -2.81569700 | 0.31868100  |
| O | -0.92597200 | -0.98731600 | 2.58194000  |
| H | -1.21570700 | -0.65798000 | 1.35469400  |
| H | -0.22031300 | -2.37611800 | 2.14074800  |
| H | -1.64071100 | -0.81998900 | 3.20513300  |
| C | 3.64087500  | 0.78023500  | 1.14142400  |
| C | 2.65626600  | 0.29075400  | 0.24301300  |
| C | 4.95226300  | 0.89900200  | 0.74641300  |
| C | 1.28364400  | 0.16586500  | 0.64388200  |
| C | 3.04444700  | -0.08608400 | -1.07106900 |
| C | 5.33994400  | 0.53283000  | -0.56473100 |
| H | 5.69654900  | 1.27331400  | 1.44296300  |
| C | 0.33345000  | -0.31242900 | -0.24953500 |
| C | 2.06005100  | -0.58451400 | -1.96593900 |
| C | 4.40717000  | 0.05080200  | -1.45044300 |
| H | 6.37835500  | 0.63368000  | -0.86667300 |
| C | 0.75803500  | -0.68424600 | -1.55627200 |
| H | 2.34685900  | -0.86735500 | -2.97476400 |
| H | 4.69755800  | -0.23437200 | -2.45839100 |
| H | 0.00986500  | -1.03688100 | -2.26224800 |
| H | 3.34132200  | 1.05690700  | 2.14606300  |
| O | 1.00286100  | 0.57731800  | 1.89571700  |
| H | 0.22830300  | 0.07696000  | 2.28079400  |

Structure and coordinates of 2-TS-p6-2w.log

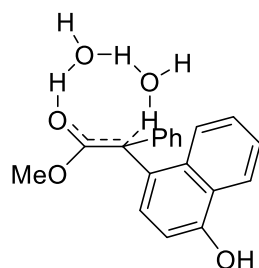

|   |             |            |             |
|---|-------------|------------|-------------|
| C | -3.37078100 | 2.55915700 | 0.32796800  |
| C | -2.74501600 | 1.32778400 | 0.49883700  |
| C | -1.67621900 | 0.92956300 | -0.32159500 |
| C | -1.25118600 | 1.82843800 | -1.31096000 |
| C | -1.86825400 | 3.06772500 | -1.47918900 |
| C | -2.93400300 | 3.44111100 | -0.66258100 |
| H | -4.19494600 | 2.83771800 | 0.97932700  |
| H | -3.08542500 | 0.65909700 | 1.28489700  |

|   |             |             |             |
|---|-------------|-------------|-------------|
| H | -0.42091600 | 1.55598100  | -1.95703800 |
| H | -1.51374200 | 3.74257600  | -2.25363700 |
| H | -3.41551300 | 4.40606700  | -0.79132800 |
| C | -0.97806500 | -0.37777300 | -0.11399300 |
| C | -1.73782900 | -1.57578200 | -0.23164900 |
| O | -1.30241800 | -2.75591000 | -0.10266900 |
| O | -3.05754600 | -1.41560300 | -0.45253900 |
| C | -3.87946300 | -2.58025400 | -0.38133000 |
| H | -3.61477500 | -3.29644300 | -1.16280400 |
| H | -3.79567900 | -3.06120300 | 0.59688400  |
| H | -4.89835800 | -2.22295000 | -0.53378800 |
| O | 0.38054100  | -3.05418700 | 1.70669800  |
| H | 0.17034400  | -3.84971600 | 2.21608100  |
| H | -0.22864200 | -3.02721700 | 0.86578100  |
| O | -0.50597600 | -0.99039800 | 2.52573500  |
| H | -0.78756000 | -0.63546700 | 1.56454800  |
| H | -0.00061300 | -2.03066600 | 2.25168400  |
| H | 0.14104600  | -0.36856700 | 2.89333300  |
| C | 3.78482900  | 1.15465600  | 0.44681100  |
| C | 2.83079000  | 0.31319200  | -0.18537400 |
| C | 3.39822100  | 2.07675900  | 1.38717900  |
| C | 3.23836500  | -0.64284500 | -1.16087900 |
| C | 1.44745200  | 0.41608800  | 0.15424400  |
| C | 2.03198400  | 2.19778200  | 1.72635600  |
| H | 4.13558700  | 2.71577100  | 1.86336900  |
| C | 2.30640300  | -1.44172500 | -1.77267100 |
| C | 0.47673800  | -0.44364300 | -0.47679400 |
| C | 1.09132800  | 1.39598200  | 1.12580100  |
| H | 1.71988700  | 2.93564900  | 2.45947900  |
| C | 0.94224400  | -1.32646500 | -1.43076500 |
| H | 0.04745800  | 1.53953500  | 1.38192800  |
| H | 0.23928600  | -1.97636100 | -1.94110400 |
| H | 4.83000200  | 1.05538800  | 0.17412500  |
| H | 2.61303400  | -2.16296200 | -2.52611500 |
| O | 4.57049500  | -0.70335600 | -1.43883100 |
| H | 4.73352800  | -1.37911100 | -2.10928000 |

Structure and coordinates of 2-TS-o6-1w.log

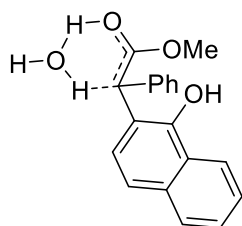

|   |             |             |             |
|---|-------------|-------------|-------------|
| C | -2.03414000 | 3.01040200  | -1.25199900 |
| C | -1.37660100 | 1.79783700  | -1.04643400 |
| C | -1.84074300 | 0.87437500  | -0.09911600 |
| C | -2.98432500 | 1.21511100  | 0.64238800  |
| C | -3.65171600 | 2.41709700  | 0.42890600  |
| C | -3.17721600 | 3.32467900  | -0.51995600 |
| H | -1.65200900 | 3.70899800  | -1.99097900 |
| H | -0.48807900 | 1.56698800  | -1.62778400 |
| H | -3.35175800 | 0.52180600  | 1.39526400  |
| H | -4.53753900 | 2.65267400  | 1.01224500  |
| H | -3.68917700 | 4.26892900  | -0.67977300 |
| C | -1.13094400 | -0.42007300 | 0.15920600  |
| C | -1.86863400 | -1.63223200 | -0.04633300 |
| O | -1.48604700 | -2.76009000 | 0.40037400  |
| O | -3.04446400 | -1.54905000 | -0.65797800 |
| C | -3.88985000 | -2.70798500 | -0.63829600 |
| H | -4.80445400 | -2.40320500 | -1.14545100 |
| H | -3.42182000 | -3.53758800 | -1.17131900 |
| H | -4.10942400 | -3.00375000 | 0.39022100  |
| H | -0.88240200 | -2.44338300 | 1.55961800  |
| O | -0.56302800 | -1.74223000 | 2.35597600  |
| H | -0.87703200 | -0.90939900 | 1.69729300  |
| H | -1.14984800 | -1.81041000 | 3.12526200  |
| C | 1.22339600  | 0.37149000  | 0.49228500  |
| C | 2.62392300  | 0.34442500  | 0.22399900  |
| C | 0.33659200  | -0.47675800 | -0.15319300 |
| C | 3.53185400  | 1.21233000  | 0.88855400  |
| C | 3.12271900  | -0.59041100 | -0.72461500 |
| C | 0.86962900  | -1.37958700 | -1.11586100 |
| C | 4.87855400  | 1.14851900  | 0.62205500  |
| H | 3.14868200  | 1.92568300  | 1.61013900  |
| C | 4.52033700  | -0.62827500 | -0.97812900 |
| C | 2.20930900  | -1.44982000 | -1.39197100 |
| H | 0.18303000  | -2.03401000 | -1.64505100 |
| C | 5.37947000  | 0.21828600  | -0.32078900 |
| H | 5.56454900  | 1.81498600  | 1.13634900  |
| H | 4.89783300  | -1.34393500 | -1.70391300 |
| H | 2.58375600  | -2.15363800 | -2.12996600 |
| H | 6.44582800  | 0.17685600  | -0.52200600 |
| O | 0.82259200  | 1.27374900  | 1.42858500  |
| H | -0.14223800 | 1.32691600  | 1.44998400  |

Structure and coordinates of 1-methoxynaphthalene.log



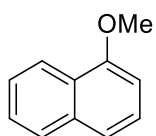

|   |             |             |             |
|---|-------------|-------------|-------------|
| C | 2.17785700  | -1.74566000 | 0.00000200  |
| C | 0.81195100  | -1.59012200 | -0.00010300 |
| C | 0.23394000  | -0.29409200 | -0.00010600 |
| C | 1.08110800  | 0.84886100  | -0.00000800 |
| C | 2.48855700  | 0.65194100  | 0.00008900  |
| C | 3.02545700  | -0.61260500 | 0.00009800  |
| H | 2.61139100  | -2.74110700 | 0.00004300  |
| H | 0.16041900  | -2.45712500 | -0.00015500 |
| C | -1.18674900 | -0.09737700 | -0.00013000 |
| C | 0.50742800  | 2.15204200  | 0.00004000  |
| H | 3.13657200  | 1.52452400  | 0.00017900  |
| H | 4.10298500  | -0.74739600 | 0.00016800  |
| C | -0.85427500 | 2.29894500  | -0.00002400 |
| C | -1.71695000 | 1.17373300  | -0.00009800 |
| H | 1.16292800  | 3.01831000  | 0.00011500  |
| H | -1.29641100 | 3.29078900  | 0.00000200  |
| H | -2.78855500 | 1.33354200  | -0.00017000 |
| O | -1.92189400 | -1.23454000 | -0.00021900 |
| C | -3.33690000 | -1.12005400 | 0.00029200  |
| H | -3.71927300 | -2.14087000 | 0.00058300  |
| H | -3.69138100 | -0.59886100 | 0.89679000  |
| H | -3.69205900 | -0.59914900 | -0.89611400 |

Structure and coordinates of 3-TS-p1.log

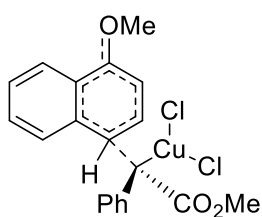

|   |             |             |             |
|---|-------------|-------------|-------------|
| C | -2.65038900 | -0.65254500 | -2.60090300 |
| C | -1.42321600 | -0.41095500 | -1.98887600 |
| C | -1.22358600 | 0.73191200  | -1.18656000 |
| C | -2.30681700 | 1.62816900  | -1.02362500 |
| C | -3.52246000 | 1.39135100  | -1.64056600 |
| C | -3.70108100 | 0.24307300  | -2.42231400 |
| H | -2.78563700 | -1.53912500 | -3.21234100 |
| H | -0.59720800 | -1.10019700 | -2.13486800 |
| H | -2.18729600 | 2.51378000  | -0.40755300 |
| H | -4.34100200 | 2.09199900  | -1.50854900 |

|    |             |             |             |
|----|-------------|-------------|-------------|
| H  | -4.65959800 | 0.05702000  | -2.89770000 |
| C  | 0.34346400  | 2.27647900  | 0.05425200  |
| O  | 0.65170200  | 2.56402300  | 1.19570500  |
| O  | 0.32888700  | 3.17884300  | -0.94083100 |
| C  | 0.72039300  | 4.51583000  | -0.59683500 |
| H  | 0.67279400  | 5.07685900  | -1.52954000 |
| H  | 0.02877300  | 4.93929900  | 0.13538800  |
| H  | 1.73707200  | 4.52872000  | -0.19763100 |
| C  | 0.05284100  | 0.92873700  | -0.52666400 |
| Cu | 1.67174600  | 0.10247100  | -1.11699500 |
| Cl | 3.54299600  | -0.82381200 | -1.86853200 |
| Cu | 3.78330800  | -0.73390700 | 0.33149900  |
| Cl | 3.99711600  | -0.64863600 | 2.47192800  |
| C  | -4.08845300 | -0.55722800 | 1.39715700  |
| C  | -2.71393200 | -0.82696000 | 1.21623500  |
| C  | -4.48610700 | 0.59136900  | 2.04744600  |
| C  | -2.26566100 | -2.02255500 | 0.54748700  |
| C  | -1.74273100 | 0.08551700  | 1.69565700  |
| C  | -3.52419400 | 1.50176100  | 2.52771900  |
| H  | -5.54254700 | 0.79558500  | 2.19085800  |
| C  | -0.90892800 | -2.33321100 | 0.46515200  |
| C  | -0.34985200 | -0.17137000 | 1.45058500  |
| C  | -2.17732700 | 1.25576800  | 2.35283600  |
| H  | -3.84608900 | 2.40334100  | 3.04028200  |
| C  | 0.02430600  | -1.42139500 | 0.94381200  |
| H  | -0.57345500 | -3.26149600 | 0.02043600  |
| H  | 0.38998000  | 0.45204300  | 1.93850000  |
| H  | -1.43389500 | 1.96015600  | 2.71246000  |
| H  | 1.08050500  | -1.66845500 | 0.88471900  |
| H  | -4.82306600 | -1.26164900 | 1.02339500  |
| O  | -3.23266500 | -2.79540800 | 0.06694900  |
| C  | -2.89006400 | -3.98343500 | -0.64857600 |
| H  | -2.25955400 | -3.74609000 | -1.51112600 |
| H  | -2.38285900 | -4.69678400 | 0.00751400  |
| H  | -3.83601600 | -4.40326400 | -0.98768100 |

Structure and coordinates of 3-TS-o1.log

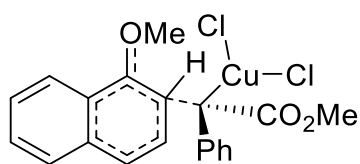

|   |            |            |            |
|---|------------|------------|------------|
| C | 3.12067700 | 0.61335200 | 2.26262200 |
| C | 1.90014900 | 0.37858200 | 1.64897800 |

|    |             |             |             |
|----|-------------|-------------|-------------|
| C  | 1.44041100  | 1.20020800  | 0.59698100  |
| C  | 2.26863900  | 2.26040600  | 0.17102000  |
| C  | 3.48724500  | 2.50377800  | 0.79315000  |
| C  | 3.91695800  | 1.67810500  | 1.83305900  |
| H  | 3.45575000  | -0.03026400 | 3.06965900  |
| H  | 1.27124700  | -0.44538500 | 1.97718400  |
| H  | 1.94707100  | 2.90251700  | -0.64324500 |
| H  | 4.10888400  | 3.32958900  | 0.46149700  |
| H  | 4.87314000  | 1.86496600  | 2.31300700  |
| C  | -0.54711700 | 2.02174100  | -0.74198000 |
| O  | -1.01495900 | 1.99727300  | -1.86432300 |
| O  | -0.70889400 | 3.06495700  | 0.08863200  |
| C  | -1.55873300 | 4.12244500  | -0.37911900 |
| H  | -1.57088100 | 4.85870600  | 0.42370800  |
| H  | -1.15495100 | 4.56563300  | -1.29206500 |
| H  | -2.56747600 | 3.74522300  | -0.56392000 |
| C  | 0.14292600  | 0.92181700  | 0.00454600  |
| Cu | -1.16019200 | -0.03078800 | 1.03713800  |
| Cl | -2.74803800 | -0.93156100 | 2.29801900  |
| Cu | -3.74895200 | -0.64781100 | 0.34364300  |
| Cl | -4.76192300 | -0.40976300 | -1.54011100 |
| C  | 2.90907200  | -2.56202800 | 0.16621200  |
| C  | 2.44920900  | -1.56947100 | -0.73112000 |
| C  | 4.23678900  | -2.60611300 | 0.52853500  |
| C  | 1.06769300  | -1.45905800 | -1.08292500 |
| C  | 3.36300800  | -0.62787800 | -1.27739700 |
| C  | 5.14550700  | -1.66801300 | -0.00332100 |
| H  | 4.58556800  | -3.35969100 | 1.22730400  |
| C  | 0.61236500  | -0.34784000 | -1.81450400 |
| C  | 2.90072900  | 0.36877200  | -2.20296000 |
| C  | 4.71930900  | -0.70452900 | -0.89370300 |
| H  | 6.19078300  | -1.70893800 | 0.28821300  |
| C  | 1.57611000  | 0.48536700  | -2.47401000 |
| H  | -0.41138300 | -0.31652100 | -2.16305500 |
| H  | 3.62839200  | 1.02952800  | -2.66404800 |
| H  | 5.42247100  | 0.01501500  | -1.30341000 |
| H  | 1.20752100  | 1.25105300  | -3.14710400 |
| H  | 2.20244800  | -3.27629200 | 0.57458200  |
| O  | 0.27764200  | -2.42450000 | -0.63296900 |
| C  | -1.05441000 | -2.55019600 | -1.14388400 |
| H  | -1.66945700 | -1.68455300 | -0.87633000 |
| H  | -1.03100300 | -2.67530900 | -2.23014400 |
| H  | -1.46313100 | -3.44191300 | -0.67073300 |

Structure and coordinates of 3-Int-p2.log

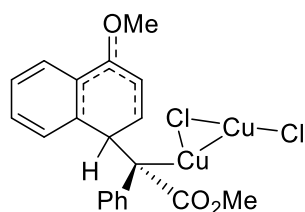

|    |             |             |             |
|----|-------------|-------------|-------------|
| C  | 0.70749600  | -0.89654600 | 2.94005700  |
| C  | 0.19434900  | -0.32044700 | 1.77730100  |
| C  | 0.87297500  | 0.70526200  | 1.10430400  |
| C  | 2.08898000  | 1.14249500  | 1.65498600  |
| C  | 2.60031500  | 0.58299800  | 2.82231300  |
| C  | 1.91524700  | -0.44712600 | 3.46870400  |
| H  | 0.15550500  | -1.69147000 | 3.43393200  |
| H  | -0.75384100 | -0.67677000 | 1.38170500  |
| H  | 2.64674200  | 1.93198600  | 1.16158900  |
| H  | 3.54103100  | 0.94890100  | 3.22460200  |
| H  | 2.31737600  | -0.88861200 | 4.37595100  |
| C  | 0.66078600  | 2.64023900  | -0.55278900 |
| O  | 0.86387000  | 3.09526500  | -1.67610200 |
| O  | 0.62550000  | 3.44959800  | 0.52767500  |
| C  | 0.79931000  | 4.84512600  | 0.28208900  |
| H  | 0.71424900  | 5.32609300  | 1.25673100  |
| H  | 1.78365100  | 5.04529900  | -0.14953800 |
| H  | 0.02429600  | 5.22333400  | -0.38992600 |
| C  | 0.37298300  | 1.22549600  | -0.22822500 |
| Cu | -1.61585500 | 1.35243500  | -0.18125500 |
| Cl | -3.83557900 | 1.50316800  | -0.07934400 |
| Cu | -3.52626500 | -0.68385400 | -0.05614700 |
| Cl | -3.28455300 | -2.82877400 | -0.07990400 |
| C  | 3.95266000  | -1.77519100 | -0.57117500 |
| C  | 2.61578600  | -1.41848000 | -0.83528400 |
| C  | 4.96016800  | -0.84839700 | -0.76128700 |
| C  | 1.54648800  | -2.38351600 | -0.68367200 |
| C  | 2.29177700  | -0.11918600 | -1.27242200 |
| C  | 4.64449700  | 0.43675700  | -1.22243200 |
| H  | 5.99222700  | -1.11758200 | -0.56261900 |
| C  | 0.22108500  | -2.09869100 | -1.10799300 |
| C  | 0.85943600  | 0.29789800  | -1.42354000 |
| C  | 3.32743900  | 0.79757000  | -1.47110300 |
| H  | 5.43720900  | 1.16138700  | -1.38235700 |
| C  | -0.07988100 | -0.83397100 | -1.49691000 |
| H  | -0.54610900 | -2.86224100 | -1.08683800 |
| H  | 0.73976000  | 0.92198600  | -2.31703700 |

|   |             |             |             |
|---|-------------|-------------|-------------|
| H | 3.08969400  | 1.80078000  | -1.80999500 |
| H | -1.09337600 | -0.60753900 | -1.81875400 |
| H | 4.18580100  | -2.77788300 | -0.23060500 |
| O | 1.88945100  | -3.52817200 | -0.17614600 |
| C | 0.91429900  | -4.57109900 | 0.04215000  |
| H | 1.47205600  | -5.38155000 | 0.50615300  |
| H | 0.13420000  | -4.21318400 | 0.71670200  |
| H | 0.49553600  | -4.89718200 | -0.91164800 |

Structure and coordinates of 3-Int-o2.log

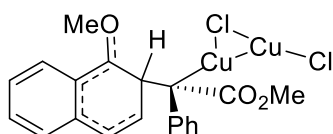

|    |             |             |             |
|----|-------------|-------------|-------------|
| C  | -2.91585800 | 0.94641800  | -2.35613200 |
| C  | -1.72962900 | 0.72887200  | -1.65693900 |
| C  | -1.45115800 | 1.39519200  | -0.45556200 |
| C  | -2.41264600 | 2.30020200  | 0.01871600  |
| C  | -3.59566700 | 2.53346700  | -0.67905600 |
| C  | -3.85576300 | 1.85261000  | -1.86869400 |
| H  | -3.10045500 | 0.41175800  | -3.28369300 |
| H  | -1.00278500 | 0.01868700  | -2.04631900 |
| H  | -2.23532100 | 2.83044500  | 0.95019900  |
| H  | -4.31933100 | 3.24392600  | -0.28912600 |
| H  | -4.78053900 | 2.02948000  | -2.41027400 |
| C  | 0.42701000  | 2.19992400  | 1.05927000  |
| O  | 0.98679700  | 2.13769100  | 2.14955800  |
| O  | 0.38203400  | 3.35473700  | 0.35958200  |
| C  | 1.02968500  | 4.48102600  | 0.95121600  |
| H  | 0.88913600  | 5.30068700  | 0.24601500  |
| H  | 0.57369500  | 4.73201900  | 1.91255500  |
| H  | 2.09657700  | 4.28937600  | 1.09364100  |
| C  | -0.20082300 | 1.06866900  | 0.33949200  |
| Cu | 1.32623200  | 0.61922900  | -0.85566100 |
| Cl | 2.97096600  | 0.03041100  | -2.22884800 |
| Cu | 3.53296800  | -0.79351700 | -0.24874700 |
| Cl | 4.13265200  | -1.66604400 | 1.62899200  |
| C  | -2.51751700 | -2.65332500 | -0.60447800 |
| C  | -2.11403100 | -1.77957000 | 0.43500100  |
| C  | -3.84917300 | -2.96730800 | -0.77938500 |
| C  | -0.76220700 | -1.35764900 | 0.65080100  |
| C  | -3.10355200 | -1.20459400 | 1.28856800  |
| C  | -4.81159600 | -2.43968800 | 0.09300800  |
| H  | -4.14779200 | -3.61879300 | -1.59331600 |

|   |             |             |             |
|---|-------------|-------------|-------------|
| C | -0.45853500 | -0.10376900 | 1.39280300  |
| C | -2.75039300 | -0.23896800 | 2.31598300  |
| C | -4.44267700 | -1.57515700 | 1.11031600  |
| H | -5.85763700 | -2.69850000 | -0.03915500 |
| C | -1.51831900 | 0.28085500  | 2.36746900  |
| H | 0.49549400  | -0.24308500 | 1.90833100  |
| H | -3.53191500 | 0.08528300  | 2.99624200  |
| H | -5.19523400 | -1.15625100 | 1.77096800  |
| H | -1.25813600 | 1.05612700  | 3.08013400  |
| H | -1.80149300 | -3.04213200 | -1.31351800 |
| O | 0.31023800  | -1.93695700 | 0.24248200  |
| C | 0.45213600  | -3.19507500 | -0.44815700 |
| H | 1.48761900  | -3.47882500 | -0.26953000 |
| H | -0.22682000 | -3.93995900 | -0.03160200 |
| H | 0.28832800  | -3.03671100 | -1.51460100 |

Structure and coordinates of 3-TS-p3.log

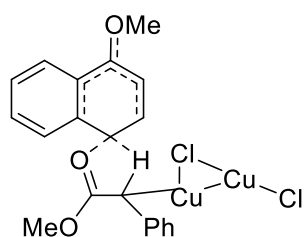

|    |             |            |             |
|----|-------------|------------|-------------|
| C  | -1.64323500 | 2.84853600 | -2.53759900 |
| C  | -1.21309700 | 1.82103200 | -1.70454100 |
| C  | -0.50391900 | 2.08358800 | -0.51690100 |
| C  | -0.24220500 | 3.42966500 | -0.20498700 |
| C  | -0.67390400 | 4.45687000 | -1.04323900 |
| C  | -1.37720300 | 4.17904000 | -2.21379800 |
| H  | -2.18810900 | 2.60590300 | -3.44579300 |
| H  | -1.42844000 | 0.79309600 | -1.98310900 |
| H  | 0.30423600  | 3.67966300 | 0.69571200  |
| H  | -0.45644300 | 5.48647100 | -0.77229100 |
| H  | -1.71065200 | 4.98279700 | -2.86324400 |
| C  | 0.39129400  | 1.02559200 | 1.69777700  |
| O  | 0.23704100  | 0.02559700 | 2.45465500  |
| O  | 0.97648200  | 2.12385100 | 2.14107000  |
| C  | 1.54795300  | 2.08141600 | 3.45997400  |
| H  | 1.98939300  | 3.06577300 | 3.61024400  |
| H  | 0.77477400  | 1.89304300 | 4.20689400  |
| H  | 2.31862500  | 1.30945600 | 3.51079200  |
| C  | -0.07037500 | 0.92165900 | 0.32532600  |
| Cu | 1.73516100  | 0.63300700 | -0.52177400 |
| Cl | 3.68069300  | 0.39228500 | -1.56301700 |

|    |             |             |             |
|----|-------------|-------------|-------------|
| Cu | 3.44260900  | -1.35703400 | -0.21996900 |
| Cl | 3.05515600  | -3.06867100 | 1.02797200  |
| H  | -0.48847900 | -0.64681400 | 1.45588600  |
| C  | -0.96565200 | -0.32825500 | 0.30500200  |
| C  | -2.40149100 | -0.17085700 | 0.59253400  |
| C  | -0.59844400 | -1.47004100 | -0.45683100 |
| C  | -2.89860100 | 0.94986200  | 1.28980100  |
| C  | -3.31735500 | -1.17888300 | 0.20863600  |
| C  | -1.47771600 | -2.47377900 | -0.81725000 |
| H  | 0.44974800  | -1.57662100 | -0.72739100 |
| C  | -4.24239200 | 1.06483600  | 1.57848100  |
| H  | -2.21877900 | 1.73806900  | 1.59461500  |
| C  | -4.69269100 | -1.04838600 | 0.51503000  |
| C  | -2.83112600 | -2.33414700 | -0.50286700 |
| H  | -1.10906900 | -3.34484100 | -1.34328900 |
| C  | -5.14937100 | 0.06092300  | 1.18938500  |
| H  | -4.60390300 | 1.94101300  | 2.10803200  |
| H  | -5.38071000 | -1.83056400 | 0.21519600  |
| H  | -6.20457800 | 0.16306900  | 1.42110100  |
| O  | -3.75105600 | -3.22584800 | -0.82163000 |
| C  | -3.38392600 | -4.41883600 | -1.52645900 |
| H  | -2.69850900 | -5.02090800 | -0.92422900 |
| H  | -4.31708400 | -4.95874800 | -1.67796000 |
| H  | -2.93579600 | -4.17231200 | -2.49245000 |

Structure and coordinates of 3-TS-o3.log

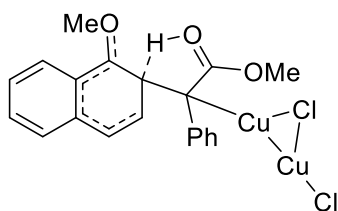

|   |             |            |             |
|---|-------------|------------|-------------|
| C | -0.77812500 | 4.04198600 | -1.83124300 |
| C | -0.75689200 | 2.83409000 | -1.13985100 |
| C | 0.21734600  | 2.56151900 | -0.16017800 |
| C | 1.18488700  | 3.55587200 | 0.07799300  |
| C | 1.16002200  | 4.76413900 | -0.61606100 |
| C | 0.18037800  | 5.02118300 | -1.57433800 |
| H | -1.54926900 | 4.21365300 | -2.57721600 |
| H | -1.51308900 | 2.08939500 | -1.37173200 |
| H | 1.96393000  | 3.38571900 | 0.81020600  |
| H | 1.91912100  | 5.51131900 | -0.40112000 |
| H | 0.16534500  | 5.96511900 | -2.11068000 |
| C | 0.83030400  | 0.97258500 | 1.81164900  |

|    |             |             |             |
|----|-------------|-------------|-------------|
| O  | 0.33628800  | 0.09097200  | 2.57020400  |
| O  | 1.91867800  | 1.63404600  | 2.16942000  |
| C  | 2.56926200  | 1.22363400  | 3.38389700  |
| H  | 3.41114700  | 1.90490500  | 3.49975200  |
| H  | 1.88864600  | 1.31314000  | 4.23250700  |
| H  | 2.92443900  | 0.19475200  | 3.29173200  |
| C  | 0.17807400  | 1.23878300  | 0.54234300  |
| Cu | 1.48068400  | 0.20615900  | -0.59892300 |
| Cl | 3.05916100  | -0.75740200 | -1.84352000 |
| Cu | 2.44485500  | -2.27828300 | -0.35794700 |
| Cl | 1.79398100  | -3.76361700 | 1.05951900  |
| C  | -3.51381700 | -2.13794300 | -0.63275500 |
| C  | -3.04117100 | -0.90686600 | -0.10489700 |
| C  | -4.85164900 | -2.46086400 | -0.59167000 |
| C  | -1.66391200 | -0.47630100 | -0.15469900 |
| C  | -3.97900900 | -0.03767900 | 0.53005300  |
| C  | -5.78005100 | -1.56640700 | -0.02934500 |
| H  | -5.18595300 | -3.41352600 | -0.98883600 |
| C  | -1.20678900 | 0.59010700  | 0.69340900  |
| C  | -3.54872400 | 1.15761200  | 1.20148800  |
| C  | -5.34685700 | -0.38421400 | 0.52984200  |
| H  | -6.83584800 | -1.81897700 | -0.01550200 |
| C  | -2.23533400 | 1.44296500  | 1.29230200  |
| H  | -0.79520000 | -0.03941300 | 1.72134000  |
| H  | -4.29735900 | 1.79442900  | 1.66214300  |
| H  | -6.05307600 | 0.29441200  | 0.99867700  |
| H  | -1.88728100 | 2.30854500  | 1.84848200  |
| H  | -2.82879700 | -2.86736400 | -1.03614200 |
| O  | -0.72612700 | -0.99942000 | -0.90626600 |
| C  | -0.84710600 | -1.95956600 | -1.96946500 |
| H  | -0.85289800 | -2.97095000 | -1.56164300 |
| H  | -1.72823800 | -1.75520200 | -2.57861900 |
| H  | 0.05460300  | -1.81363100 | -2.56381700 |

Structure and coordinates of 3-Int-p4.log

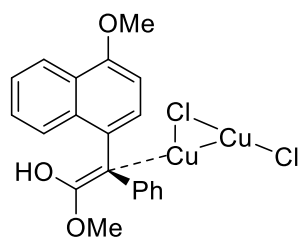

|   |             |            |             |
|---|-------------|------------|-------------|
| C | 0.89876400  | 4.54620400 | -0.65429600 |
| C | 1.00372600  | 3.20822300 | -0.28424900 |
| C | -0.11825900 | 2.36073100 | -0.30054200 |



|    |             |             |             |
|----|-------------|-------------|-------------|
| C  | -1.33920400 | 2.90307300  | -0.73029500 |
| C  | -1.44306500 | 4.24318300  | -1.09880400 |
| C  | -0.32640300 | 5.07509400  | -1.05994900 |
| H  | 1.78364800  | 5.17584600  | -0.63021200 |
| H  | 1.97044600  | 2.82105600  | 0.01830700  |
| H  | -2.22388900 | 2.27675900  | -0.77391200 |
| H  | -2.40493000 | 4.63436800  | -1.41769600 |
| H  | -0.40800600 | 6.11953900  | -1.34566400 |
| C  | 0.70991600  | 0.49569600  | 1.20006600  |
| O  | 0.47925100  | -0.68882500 | 1.75308300  |
| O  | 1.53862500  | 1.33850000  | 1.80723900  |
| C  | 2.29115900  | 0.91431800  | 2.95443000  |
| H  | 2.75970500  | 1.82122100  | 3.33289700  |
| H  | 1.63217000  | 0.49055700  | 3.71537300  |
| H  | 3.06074600  | 0.19520900  | 2.66385600  |
| C  | -0.04884800 | 0.90884700  | 0.09403400  |
| Cu | 1.54766200  | 0.17270000  | -0.99392900 |
| Cl | 3.25569700  | -0.69919000 | -2.14323300 |
| Cu | 3.12240500  | -1.73559100 | -0.18811300 |
| Cl | 2.88936400  | -2.56098300 | 1.81315900  |
| C  | -4.56518000 | -0.94457000 | 1.23629600  |
| C  | -3.47741300 | -0.84531900 | 0.33016700  |
| C  | -4.55004200 | -0.26078400 | 2.42808900  |
| C  | -3.49685100 | -1.53980500 | -0.92438400 |
| C  | -2.34990800 | -0.04305500 | 0.66455300  |
| C  | -3.44696500 | 0.55870700  | 2.75667700  |
| H  | -5.38518100 | -0.34498300 | 3.11685900  |
| C  | -2.44324500 | -1.41575600 | -1.79869600 |
| C  | -1.24096200 | 0.04704600  | -0.24619700 |
| C  | -2.37993600 | 0.66374800  | 1.89741700  |
| H  | -3.44284700 | 1.10842100  | 3.69317300  |
| C  | -1.32969100 | -0.61814800 | -1.44464300 |
| H  | -1.54886900 | 1.30909400  | 2.16386000  |
| H  | -0.51851300 | -0.54111800 | -2.16673800 |
| H  | -5.41147900 | -1.56907500 | 0.97201400  |
| H  | 1.29700700  | -1.20200300 | 1.95547700  |
| H  | -2.44054500 | -1.92152000 | -2.75662300 |
| O  | -4.60168300 | -2.28335900 | -1.15474900 |
| C  | -4.65861400 | -3.05393700 | -2.34670000 |
| H  | -3.83288200 | -3.77322000 | -2.38925900 |
| H  | -5.60630800 | -3.59155400 | -2.30772700 |
| H  | -4.64169100 | -2.41334600 | -3.23593700 |

Structure and coordinates of 3-Int-o4.log

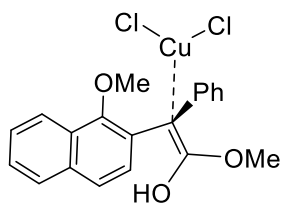

|    |             |             |             |
|----|-------------|-------------|-------------|
| C  | 1.09823800  | 4.49751300  | -0.52109400 |
| C  | 1.15196400  | 3.22629300  | 0.04487800  |
| C  | 0.00098500  | 2.41706900  | 0.12501200  |
| C  | -1.19230900 | 2.94032000  | -0.40819000 |
| C  | -1.24003500 | 4.21131100  | -0.97393100 |
| C  | -0.09537500 | 5.00351800  | -1.03217700 |
| H  | 2.00667300  | 5.09162400  | -0.56629900 |
| H  | 2.10031900  | 2.86241700  | 0.41585500  |
| H  | -2.10212800 | 2.35099200  | -0.38724400 |
| H  | -2.18106600 | 4.58011000  | -1.37216400 |
| H  | -0.13173000 | 5.99383500  | -1.47553100 |
| C  | 0.97899400  | 0.52429100  | 1.54502500  |
| O  | 0.76674900  | -0.61870100 | 2.19900800  |
| O  | 2.05749700  | 1.23720400  | 1.85345700  |
| C  | 3.04705400  | 0.71120000  | 2.75134500  |
| H  | 3.71438700  | 1.54733200  | 2.95395100  |
| H  | 2.58606400  | 0.36898600  | 3.68001300  |
| H  | 3.60365300  | -0.09912300 | 2.27443200  |
| C  | -0.00505300 | 1.02028800  | 0.68909300  |
| Cu | 1.03326700  | 0.17581800  | -0.86473500 |
| Cl | 2.50782700  | -0.53397800 | -2.39592600 |
| Cu | 2.80287700  | -1.70026400 | -0.54039200 |
| Cl | 2.96899300  | -2.72376800 | 1.36599700  |
| C  | -3.81478100 | -1.61624100 | -1.25034900 |
| C  | -3.22917700 | -0.89349000 | -0.17513700 |
| C  | -5.13746000 | -1.98572600 | -1.20434600 |
| C  | -1.86116900 | -0.47933700 | -0.18286300 |
| C  | -4.04342700 | -0.52201400 | 0.93073900  |
| C  | -5.93742000 | -1.65614800 | -0.08359000 |
| H  | -5.57656100 | -2.52592200 | -2.03769500 |
| C  | -1.35660900 | 0.35957400  | 0.78497700  |
| C  | -3.48706000 | 0.28038600  | 1.96435500  |
| C  | -5.40271000 | -0.93531800 | 0.95566000  |
| H  | -6.97908800 | -1.96155800 | -0.05708300 |
| C  | -2.19687300 | 0.72580600  | 1.87392900  |
| H  | -4.10934200 | 0.55887200  | 2.81030900  |
| H  | -6.01533100 | -0.65776800 | 1.80943200  |
| H  | -1.78990400 | 1.38070200  | 2.63965600  |
| H  | -3.21850500 | -1.85139100 | -2.12586900 |

|   |             |             |             |
|---|-------------|-------------|-------------|
| O | -1.04678100 | -0.89450500 | -1.21752300 |
| H | 1.52243800  | -1.24349300 | 2.11823000  |
| C | -0.66476400 | -2.28161500 | -1.12663500 |
| H | -1.53837300 | -2.93765700 | -1.15516400 |
| H | -0.02964800 | -2.48315600 | -1.98964400 |
| H | -0.11376700 | -2.46227200 | -0.19743300 |

Structure and coordinates of 3/4-Int-p5.log

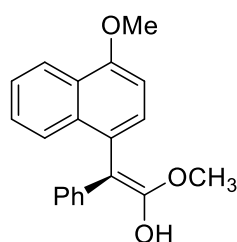

|   |             |             |             |
|---|-------------|-------------|-------------|
| C | -2.52399500 | 1.68705200  | 2.35636400  |
| C | -1.75535900 | 0.70388100  | 1.73830500  |
| C | -2.02504200 | 0.29529000  | 0.42435500  |
| C | -3.07563400 | 0.92487500  | -0.26005800 |
| C | -3.84733700 | 1.90647300  | 0.35731200  |
| C | -3.57754300 | 2.29115800  | 1.67056000  |
| H | -2.29909200 | 1.98092500  | 3.37764600  |
| H | -0.93289700 | 0.24521200  | 2.27991200  |
| H | -3.28278600 | 0.64715300  | -1.29016800 |
| H | -4.65592700 | 2.37896600  | -0.19314800 |
| H | -4.17546000 | 3.06003500  | 2.15073700  |
| C | -1.16773400 | -0.72797900 | -0.22914000 |
| C | -1.65395200 | -1.70352700 | -1.02387700 |
| O | -2.94133100 | -2.06757100 | -1.21073000 |
| C | -3.80949800 | -2.19127500 | -0.07776600 |
| H | -4.51311900 | -2.98712900 | -0.32601500 |
| H | -3.23942000 | -2.46180900 | 0.81540600  |
| H | -4.35389100 | -1.26139700 | 0.09880600  |
| C | 0.93967200  | -1.52934900 | 0.82999900  |
| C | 0.30596700  | -0.63938700 | -0.00245200 |
| C | 1.08493000  | 0.40472900  | -0.60472900 |
| C | 2.47586900  | 0.50925800  | -0.31957500 |
| C | 3.07955300  | -0.44341600 | 0.56528500  |
| C | 2.32291900  | -1.44825200 | 1.12062300  |
| H | -0.54354700 | 1.27010300  | -1.73712600 |
| H | 0.36173800  | -2.32425300 | 1.29349900  |
| C | 0.51270500  | 1.34794900  | -1.50090700 |
| C | 3.23833900  | 1.54495100  | -0.91903700 |
| C | 2.64957200  | 2.44422200  | -1.77553100 |
| C | 1.27164300  | 2.34103300  | -2.07149500 |

|   |             |             |             |
|---|-------------|-------------|-------------|
| H | 4.29681000  | 1.61574200  | -0.69400800 |
| H | 3.24276600  | 3.23221100  | -2.22964700 |
| H | 0.81257600  | 3.04861800  | -2.75563100 |
| O | 4.40375000  | -0.26429100 | 0.78737000  |
| O | -0.83352800 | -2.44606800 | -1.79926000 |
| H | -1.32791700 | -3.21804200 | -2.10873600 |
| H | 2.76051900  | -2.17912700 | 1.79023500  |
| C | 5.06473400  | -1.16372100 | 1.66397600  |
| H | 6.10340800  | -0.83436400 | 1.70161800  |
| H | 4.63377600  | -1.12266000 | 2.67081300  |
| H | 5.02246900  | -2.19053200 | 1.28350100  |

Structure and coordinates of 3/4-Int-o5.log

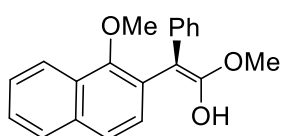

|   |             |             |             |
|---|-------------|-------------|-------------|
| C | -2.54560300 | -2.64789700 | -1.24601100 |
| C | -1.71462200 | -1.58610900 | -0.89839500 |
| C | -2.09951900 | -0.65933000 | 0.08167300  |
| C | -3.33658600 | -0.84493700 | 0.71753000  |
| C | -4.17064200 | -1.90433800 | 0.36696900  |
| C | -3.78023400 | -2.81110900 | -0.61779000 |
| H | -2.22615700 | -3.35026900 | -2.01047200 |
| H | -0.75729700 | -1.46887600 | -1.39708800 |
| H | -3.64446700 | -0.15354000 | 1.49713900  |
| H | -5.12373200 | -2.02707000 | 0.87359300  |
| H | -4.42774400 | -3.64017400 | -0.88739100 |
| C | -1.18383600 | 0.44027900  | 0.47538100  |
| C | -1.59931300 | 1.68786900  | 0.76848100  |
| O | -2.81753700 | 2.23045200  | 0.56028800  |
| C | -3.45765700 | 2.02734000  | -0.70670900 |
| H | -3.97976800 | 2.95789800  | -0.93502800 |
| H | -2.71543300 | 1.81403400  | -1.48044900 |
| H | -4.17782300 | 1.20843600  | -0.64942100 |
| C | 0.74025800  | -0.42882300 | 1.85872200  |
| C | 2.05532000  | -0.77076000 | 2.03228500  |
| C | 2.98628800  | -0.60982400 | 0.97039900  |
| C | 2.53130400  | -0.09333000 | -0.27500100 |
| C | 1.15555300  | 0.26572200  | -0.40975500 |
| C | 0.26447900  | 0.10746700  | 0.63060900  |
| H | 4.70145600  | -1.35508000 | 2.06082600  |
| H | 0.02910500  | -0.56006000 | 2.66950500  |
| H | 2.40129500  | -1.17233400 | 2.98081400  |

|   |             |             |             |
|---|-------------|-------------|-------------|
| C | 4.35653100  | -0.96144400 | 1.10833100  |
| C | 3.45351700  | 0.04267500  | -1.34758700 |
| C | 4.77155600  | -0.30709800 | -1.18218800 |
| C | 5.23020400  | -0.81112600 | 0.05961600  |
| H | 3.09898100  | 0.41974900  | -2.30133700 |
| H | 5.46942300  | -0.20091200 | -2.00738500 |
| H | 6.27526800  | -1.08137200 | 0.17744900  |
| O | -0.77131500 | 2.57386400  | 1.36719400  |
| H | -1.16300600 | 3.45533600  | 1.28989100  |
| O | 0.72341200  | 0.71297400  | -1.63420600 |
| C | 0.79744900  | 2.12444800  | -1.81739700 |
| H | 0.12749400  | 2.64721800  | -1.12658200 |
| H | 1.82075400  | 2.49019800  | -1.66974300 |
| H | 0.48849000  | 2.32045000  | -2.84549600 |

Structure and coordinates of 3-Int-p5\*.log

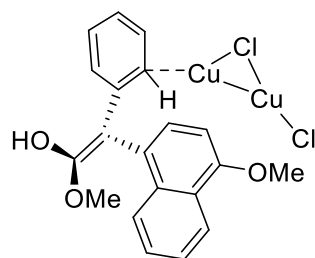

|   |             |             |             |
|---|-------------|-------------|-------------|
| C | -3.42843300 | 1.37955100  | 1.59313900  |
| C | -2.43329700 | 1.83513500  | 0.72318500  |
| C | -1.08384800 | 1.52592000  | 0.93260600  |
| C | -0.76185600 | 0.72516900  | 2.06358700  |
| C | -1.76760000 | 0.26780600  | 2.93930700  |
| C | -3.11370000 | 0.59396800  | 2.69411900  |
| H | -4.46407100 | 1.63328100  | 1.38881000  |
| H | -2.72698300 | 2.41833800  | -0.13994000 |
| H | 0.28107300  | 0.55875700  | 2.32138300  |
| H | -1.48979700 | -0.25676100 | 3.84990100  |
| H | -3.88813900 | 0.24420000  | 3.36848900  |
| C | 0.01629300  | 1.95914700  | 0.04409500  |
| C | -0.00807700 | 3.09834600  | -0.67788500 |
| O | 0.98616900  | 3.38118900  | -1.54844200 |
| O | -0.97446200 | 4.02792800  | -0.56464400 |
| C | -1.69808000 | 4.33243300  | -1.77184600 |
| H | -2.58759200 | 4.87731900  | -1.45574200 |
| H | -1.10695100 | 4.96319800  | -2.44230300 |
| H | -1.98697100 | 3.40964800  | -2.28497400 |
| C | 2.26538900  | -2.25756800 | -1.32183200 |
| C | 2.30718600  | -0.99324800 | -0.67202900 |

|    |             |             |             |
|----|-------------|-------------|-------------|
| C  | 3.35834400  | -3.08881300 | -1.30758700 |
| C  | 1.18639800  | -0.12230500 | -0.66394200 |
| C  | 3.50420100  | -0.60295600 | -0.00781300 |
| C  | 4.54673600  | -2.69736100 | -0.64124000 |
| H  | 3.31458700  | -4.05335000 | -1.80445200 |
| C  | 1.23287800  | 1.09254800  | -0.02003100 |
| C  | 3.53113300  | 0.66981500  | 0.63564200  |
| C  | 4.62056500  | -1.48123000 | -0.00611100 |
| H  | 5.40177900  | -3.36692600 | -0.63392400 |
| C  | 2.42966200  | 1.48860900  | 0.63321600  |
| H  | 5.52667500  | -1.17937400 | 0.50933800  |
| H  | 2.47643000  | 2.44610500  | 1.14437400  |
| H  | 1.35107300  | -2.55386400 | -1.82937400 |
| Cu | -1.32133200 | -1.23918200 | 1.42534800  |
| Cl | -1.54271300 | -3.19182000 | 0.39040700  |
| Cu | -2.21009700 | -1.70904800 | -1.10433000 |
| Cl | -2.88132800 | -0.28884600 | -2.57675200 |
| H  | 1.02465600  | 4.33524600  | -1.70607600 |
| O  | 4.67176400  | 1.04752000  | 1.29860500  |
| H  | 0.27839600  | -0.43255700 | -1.17609300 |
| C  | 5.53671300  | 1.88650100  | 0.53383000  |
| H  | 5.85926400  | 1.38272300  | -0.38550000 |
| H  | 5.03928900  | 2.82879200  | 0.27539600  |
| H  | 6.40601100  | 2.09334200  | 1.16042100  |

Structure and coordinates of 3-Int-o5\*.log

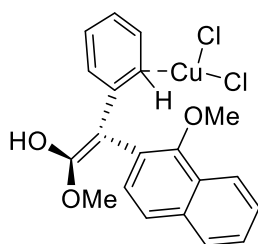

|   |             |             |            |
|---|-------------|-------------|------------|
| C | -2.67765700 | 0.92438200  | 2.68816500 |
| C | -1.71915900 | 1.55724800  | 1.89282400 |
| C | -0.51333500 | 0.92593900  | 1.54057900 |
| C | -0.31351400 | -0.39295300 | 2.04447000 |
| C | -1.27193300 | -1.01714400 | 2.87305500 |
| C | -2.47393100 | -0.35626700 | 3.18544700 |
| H | -3.59437600 | 1.45615400  | 2.92485600 |
| H | -1.91679800 | 2.56182600  | 1.54789600 |
| H | 0.64043800  | -0.88835700 | 1.89055700 |
| H | -1.03367300 | -1.96827900 | 3.34364000 |
| H | -3.20969300 | -0.83424500 | 3.82333300 |
| C | 0.55186000  | 1.54467500  | 0.72921300 |

|    |             |             |             |
|----|-------------|-------------|-------------|
| C  | 0.42829100  | 2.71082400  | 0.04323800  |
| O  | 1.45024900  | 3.16282700  | -0.70642600 |
| O  | -0.66542000 | 3.48231300  | 0.09242700  |
| C  | -1.11646100 | 4.09644300  | -1.12880800 |
| H  | -2.16716400 | 4.33208100  | -0.96462800 |
| H  | -0.57082000 | 5.02466400  | -1.32801300 |
| H  | -1.02302400 | 3.40145600  | -1.96608500 |
| C  | 4.14370900  | -0.91304000 | -1.73695200 |
| C  | 3.64258400  | -0.33168700 | -0.54146900 |
| C  | 5.39092900  | -1.48992500 | -1.76088800 |
| C  | 2.35154900  | 0.27793500  | -0.48654100 |
| C  | 4.44903800  | -0.34523800 | 0.63069100  |
| C  | 6.19454700  | -1.51005600 | -0.59444300 |
| H  | 5.76819700  | -1.92984600 | -2.67929400 |
| C  | 1.88337600  | 0.86958700  | 0.66879600  |
| C  | 3.94470900  | 0.24794400  | 1.82047100  |
| C  | 5.73346700  | -0.95095800 | 0.57279200  |
| H  | 7.17824100  | -1.96891000 | -0.62788900 |
| C  | 2.70830500  | 0.83755200  | 1.82924100  |
| H  | 4.55781900  | 0.23857000  | 2.71765800  |
| H  | 6.34726100  | -0.95961300 | 1.46997500  |
| H  | 2.33184400  | 1.29935500  | 2.73825900  |
| H  | 3.52860900  | -0.88800600 | -2.63046100 |
| Cu | -1.63164600 | -1.66658600 | 0.87495100  |
| Cl | -2.55113600 | -2.90648000 | -0.73512700 |
| Cu | -2.89558300 | -0.82300300 | -1.37752200 |
| Cl | -3.27415000 | 1.19521900  | -2.01681400 |
| O  | 1.61597100  | 0.29495800  | -1.64201700 |
| H  | 1.36147900  | 4.11184900  | -0.87031700 |
| C  | 0.63096900  | -0.72848200 | -1.72277700 |
| H  | 1.08814800  | -1.72453500 | -1.66154300 |
| H  | -0.10860600 | -0.62377900 | -0.91889100 |
| H  | 0.13116200  | -0.61233400 | -2.68601900 |

Structure and coordinates of 3/4-TS-p6-2w.log

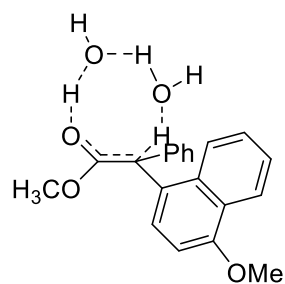

|   |             |            |             |
|---|-------------|------------|-------------|
| C | -3.89189400 | 2.22436100 | -0.07951700 |
| C | -3.15174900 | 1.08860100 | 0.23556400  |

|   |             |             |             |
|---|-------------|-------------|-------------|
| C | -1.96911800 | 0.77105100  | -0.45329700 |
| C | -1.55068000 | 1.65358600  | -1.46019100 |
| C | -2.28313500 | 2.79885600  | -1.77213700 |
| C | -3.46073100 | 3.09037400  | -1.08642800 |
| H | -4.80464800 | 2.44022800  | 0.46953400  |
| H | -3.49189200 | 0.43228700  | 1.03196800  |
| H | -0.63327900 | 1.44468800  | -2.00392300 |
| H | -1.93088900 | 3.46372700  | -2.55619300 |
| H | -4.03194900 | 3.98227100  | -1.32727900 |
| C | -1.15630300 | -0.43406600 | -0.09615800 |
| C | -1.76727100 | -1.71499800 | -0.20373800 |
| O | -1.22271600 | -2.83040600 | 0.03815100  |
| O | -3.06994600 | -1.71684400 | -0.54956100 |
| C | -3.77245000 | -2.95461000 | -0.45163900 |
| H | -3.38866500 | -3.68417500 | -1.16925400 |
| H | -3.70489900 | -3.36767100 | 0.55841300  |
| H | -4.81069300 | -2.71709300 | -0.68604600 |
| O | 0.30141000  | -2.84072500 | 2.00601300  |
| H | 0.12883000  | -3.62773600 | 2.54196200  |
| H | -0.22171200 | -2.92709000 | 1.11284400  |
| O | -0.88412300 | -0.85342300 | 2.60824600  |
| H | -1.10756400 | -0.58235700 | 1.60539000  |
| H | -0.24249100 | -1.83953800 | 2.44827600  |
| H | -0.35226600 | -0.14159200 | 2.99662800  |
| C | 3.33509200  | 1.64595800  | 0.81075100  |
| C | 2.54488600  | 0.67354500  | 0.14350900  |
| C | 2.76226300  | 2.56668000  | 1.65360000  |
| C | 3.15212700  | -0.28119900 | -0.73382700 |
| C | 1.13297100  | 0.64088000  | 0.34681100  |
| C | 1.36510800  | 2.55308400  | 1.85596200  |
| H | 3.37825000  | 3.30556500  | 2.15707000  |
| C | 2.37108100  | -1.20600400 | -1.38240700 |
| C | 0.32523800  | -0.35291100 | -0.31930500 |
| C | 0.57955800  | 1.62266600  | 1.21806500  |
| H | 0.90570800  | 3.28744700  | 2.51119200  |
| C | 0.97362200  | -1.22159100 | -1.17027000 |
| H | -0.49396400 | 1.66081600  | 1.36705300  |
| H | 0.39591400  | -1.97077200 | -1.70167900 |
| H | 4.40630300  | 1.65130500  | 0.64226200  |
| H | 2.80233200  | -1.93034100 | -2.06357800 |
| O | 4.49945500  | -0.18279700 | -0.85834100 |
| C | 5.15651300  | -1.08902700 | -1.72962200 |
| H | 6.21734000  | -0.84340700 | -1.67330400 |
| H | 5.00726300  | -2.12664900 | -1.40946200 |



|   |            |             |             |
|---|------------|-------------|-------------|
| H | 4.80958100 | -0.96777000 | -2.76228900 |
|---|------------|-------------|-------------|

Structure and coordinates of 3/4-TS-o6-2w.log

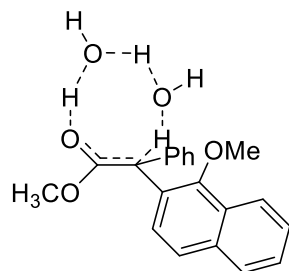

|   |             |             |             |
|---|-------------|-------------|-------------|
| C | -3.46922900 | 2.67877100  | 0.33727900  |
| C | -2.90085100 | 1.41309700  | 0.45105600  |
| C | -1.78223500 | 1.03933900  | -0.30985300 |
| C | -1.24599300 | 1.99873100  | -1.18074700 |
| C | -1.80537000 | 3.27054600  | -1.29343400 |
| C | -2.92377300 | 3.61925100  | -0.53760200 |
| H | -4.33687700 | 2.93457700  | 0.93982000  |
| H | -3.33548700 | 0.69547300  | 1.14208500  |
| H | -0.37301600 | 1.74787700  | -1.77745200 |
| H | -1.36688900 | 3.98988400  | -1.97994300 |
| H | -3.36315700 | 4.60856000  | -0.62606100 |
| C | -1.17846800 | -0.32420500 | -0.18249000 |
| C | -1.98514300 | -1.45475000 | -0.48630500 |
| O | -1.63323800 | -2.66691000 | -0.39972100 |
| O | -3.25694700 | -1.19406800 | -0.84706700 |
| C | -4.15266100 | -2.30047300 | -0.94215000 |
| H | -5.11397400 | -1.86858400 | -1.22164000 |
| H | -3.82674800 | -3.00978700 | -1.70623100 |
| H | -4.24292800 | -2.81686900 | 0.01780800  |
| O | -0.19988800 | -3.16399500 | 1.57422700  |
| H | -0.43727700 | -4.00756200 | 1.98370300  |
| H | -0.70350900 | -3.06438300 | 0.67200000  |
| O | -1.08658700 | -1.12198200 | 2.44220800  |
| H | -1.20564800 | -0.68185700 | 1.48741800  |
| H | -0.64348000 | -2.18588800 | 2.15619200  |
| H | -1.95963300 | -1.18547100 | 2.85746300  |
| C | 3.51939200  | 1.23333300  | 0.59220600  |
| C | 2.59896700  | 0.32731300  | -0.00431100 |
| C | 4.85961900  | 1.17692600  | 0.29216100  |
| C | 1.19959600  | 0.34321000  | 0.29334500  |
| C | 3.09166400  | -0.60999700 | -0.95558600 |
| C | 5.35325700  | 0.21478100  | -0.62072600 |
| H | 5.54541900  | 1.88269500  | 0.75161500  |
| C | 0.29432400  | -0.44893000 | -0.40043200 |

|   |            |             |             |
|---|------------|-------------|-------------|
| C | 2.16512000 | -1.44887700 | -1.62889500 |
| C | 4.48344000 | -0.65309200 | -1.23455400 |
| H | 6.41532300 | 0.17564200  | -0.84349500 |
| C | 0.82471000 | -1.34484200 | -1.37778300 |
| H | 2.53125500 | -2.15226400 | -2.37211000 |
| H | 4.84618100 | -1.38157400 | -1.95521500 |
| H | 0.13473300 | -1.96942400 | -1.93408900 |
| H | 3.15710600 | 1.99175900  | 1.27592500  |
| O | 0.72002100 | 1.23032200  | 1.22251600  |
| C | 1.11030200 | 1.04195100  | 2.58374100  |
| H | 1.80837100 | 1.82601600  | 2.89341500  |
| H | 0.20881000 | 1.10856100  | 3.19658400  |
| H | 1.57451600 | 0.06318300  | 2.73538800  |

Structure and coordinates of 4-TS-p1.log

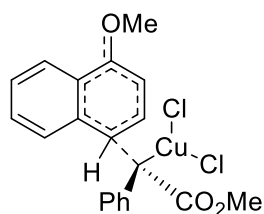

|    |             |             |             |
|----|-------------|-------------|-------------|
| C  | -1.62378700 | 0.86215800  | 2.54261400  |
| C  | -0.53948100 | 0.77838400  | 1.67674100  |
| C  | -0.13405900 | -0.46836300 | 1.13986900  |
| C  | -0.87175500 | -1.62680700 | 1.50561800  |
| C  | -1.95153600 | -1.53479500 | 2.35997000  |
| C  | -2.33501700 | -0.28761500 | 2.87432400  |
| H  | -1.91817600 | 1.82381400  | 2.94956200  |
| H  | 0.01796400  | 1.67512400  | 1.42421200  |
| H  | -0.58974500 | -2.59549700 | 1.10596200  |
| H  | -2.50915100 | -2.42681400 | 2.62633000  |
| H  | -3.18700500 | -0.22177200 | 3.54432200  |
| C  | 0.95387900  | -0.53704500 | 0.21095400  |
| C  | 1.50914100  | -1.89543300 | -0.10952200 |
| O  | 1.49412000  | -2.47603700 | -1.17434300 |
| O  | 2.08983400  | -2.37571700 | 0.99125300  |
| C  | 2.79586200  | -3.61884200 | 0.84947900  |
| H  | 3.23924000  | -3.80969800 | 1.82562100  |
| H  | 2.10182700  | -4.41862600 | 0.58141900  |
| H  | 3.57444000  | -3.52867200 | 0.08913000  |
| Cu | 2.21617300  | 0.96737500  | 0.04399500  |
| Cl | 2.31187800  | 3.21165700  | 0.16109900  |
| Cl | 4.12827600  | -0.03587400 | -0.54984300 |
| C  | -1.12772700 | 1.99166700  | -1.20845200 |

|   |             |             |             |
|---|-------------|-------------|-------------|
| C | -2.30771500 | 1.39901100  | -0.76373000 |
| C | -2.54613000 | -0.01023500 | -0.95440700 |
| C | -1.51681500 | -0.80173600 | -1.52215900 |
| C | -0.25718400 | -0.19542100 | -1.84347400 |
| C | -0.13580700 | 1.19506000  | -1.77317100 |
| H | -4.55411600 | 0.00672600  | -0.15259300 |
| H | -0.96446500 | 3.05689000  | -1.11001000 |
| C | -3.77242000 | -0.60581100 | -0.58758400 |
| C | -1.74343100 | -2.18200800 | -1.70552500 |
| H | 0.48721200  | -0.77741900 | -2.37324300 |
| H | 0.77144800  | 1.66666000  | -2.14066700 |
| C | -2.95091700 | -2.74769100 | -1.34781300 |
| C | -3.97100800 | -1.95616900 | -0.78627500 |
| H | -0.94905100 | -2.78985200 | -2.12672600 |
| H | -3.11631700 | -3.80982500 | -1.50066100 |
| H | -4.91590200 | -2.41198800 | -0.50765100 |
| O | -3.29886800 | 2.06551500  | -0.18193100 |
| C | -3.15672200 | 3.46817300  | 0.05243300  |
| H | -2.29024800 | 3.66962100  | 0.68947100  |
| H | -3.06530800 | 4.00818100  | -0.89451600 |
| H | -4.06918300 | 3.77199000  | 0.56366400  |

Structure and coordinates of 4-TS-o1.log

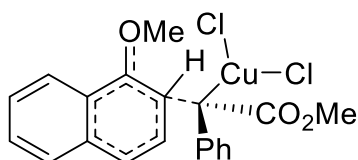

|   |             |             |             |
|---|-------------|-------------|-------------|
| C | -1.82403300 | 0.65015700  | -2.56231000 |
| C | -0.80371400 | 0.23678400  | -1.72443400 |
| C | -0.25771900 | 1.10422800  | -0.74634600 |
| C | -0.81725700 | 2.40034800  | -0.62623700 |
| C | -1.84064500 | 2.81302100  | -1.46839800 |
| C | -2.34761900 | 1.93979000  | -2.43129600 |
| H | -2.22021000 | -0.02983400 | -3.30910000 |
| H | -0.40438800 | -0.76918700 | -1.82363200 |
| H | -0.43453400 | 3.08612600  | 0.12054500  |
| H | -2.25448300 | 3.81099800  | -1.36579500 |
| H | -3.15148500 | 2.26426000  | -3.08534500 |
| C | 0.80832300  | 0.63127300  | 0.09966200  |
| C | 1.67760500  | 1.62556800  | 0.82608200  |
| O | 2.08734800  | 1.52998300  | 1.96571900  |
| O | 2.03538200  | 2.60687700  | -0.00235800 |
| C | 3.04751200  | 3.50380900  | 0.47767500  |

|    |             |             |             |
|----|-------------|-------------|-------------|
| H  | 3.24549900  | 4.18546500  | -0.34828900 |
| H  | 2.68410300  | 4.05514600  | 1.34801800  |
| H  | 3.95178700  | 2.94944000  | 0.73800200  |
| Cu | 1.80876000  | -0.97001000 | -0.50787100 |
| Cl | 1.77741500  | -3.07216500 | -1.27164100 |
| Cl | 3.84704400  | -0.07480500 | -0.79050200 |
| C  | -0.30524700 | -0.02665100 | 2.06584300  |
| C  | -0.95877600 | -1.11757400 | 1.46702900  |
| C  | -2.23189900 | -0.93695500 | 0.84013000  |
| C  | -2.88801300 | 0.31272100  | 1.00140200  |
| C  | -2.28721800 | 1.34407200  | 1.80359800  |
| C  | -1.04698200 | 1.16804700  | 2.32743100  |
| H  | -2.30838100 | -2.89868000 | -0.06884600 |
| H  | 0.62269600  | -0.18032100 | 2.59831800  |
| C  | -2.82246500 | -1.95129500 | 0.05221200  |
| C  | -4.12812500 | 0.50960500  | 0.36054200  |
| H  | -2.83951600 | 2.26399800  | 1.96866500  |
| H  | -0.56811100 | 1.95050700  | 2.90626600  |
| C  | -4.68465900 | -0.48767600 | -0.41560500 |
| C  | -4.03006900 | -1.72539800 | -0.57240700 |
| H  | -4.63501900 | 1.46285000  | 0.47894200  |
| H  | -5.63638100 | -0.31862400 | -0.91043500 |
| H  | -4.47634400 | -2.49917800 | -1.18866700 |
| O  | -0.45136100 | -2.33905800 | 1.41469900  |
| C  | 0.72860700  | -2.64125900 | 2.16760000  |
| H  | 1.57605000  | -2.02576600 | 1.84818500  |
| H  | 0.53937300  | -2.48788000 | 3.23394000  |
| H  | 0.94289800  | -3.68866000 | 1.96639300  |

Structure and coordinates of 4-Int-p2.log

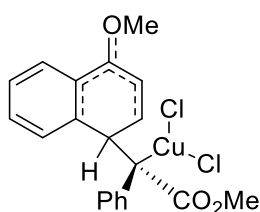

|   |             |             |            |
|---|-------------|-------------|------------|
| C | 0.94326800  | -1.45716100 | 2.79918900 |
| C | 0.22078700  | -1.15862800 | 1.64432500 |
| C | 0.00860000  | 0.16790800  | 1.24073300 |
| C | 0.54460700  | 1.18979000  | 2.04219300 |
| C | 1.26526100  | 0.89535100  | 3.19514200 |
| C | 1.47232100  | -0.43106900 | 3.57773600 |
| H | 1.08575300  | -2.49419900 | 3.08864500 |
| H | -0.19237100 | -1.97321100 | 1.05634500 |

|    |             |             |             |
|----|-------------|-------------|-------------|
| H  | 0.40741200  | 2.22870500  | 1.75732800  |
| H  | 1.67138300  | 1.70542400  | 3.79398800  |
| H  | 2.03528300  | -0.65934100 | 4.47794600  |
| C  | -1.35878200 | 1.80330300  | -0.15936900 |
| O  | -1.34291100 | 2.56276800  | -1.11329300 |
| O  | -2.09518600 | 2.04941400  | 0.93726700  |
| C  | -2.89855000 | 3.23360000  | 0.91555200  |
| H  | -3.40489700 | 3.25933000  | 1.87985200  |
| H  | -2.27502200 | 4.12250000  | 0.79332200  |
| H  | -3.63167600 | 3.18351800  | 0.10660900  |
| C  | -0.66533000 | 0.48219600  | -0.07559700 |
| Cu | -2.30977000 | -0.71861200 | -0.18600200 |
| C  | 4.02062400  | 0.77814200  | -0.48442500 |
| C  | 2.79124900  | 0.16421400  | -0.79633900 |
| C  | 4.11659700  | 2.15591600  | -0.47076100 |
| C  | 2.69849400  | -1.27427000 | -0.89541600 |
| C  | 1.64505400  | 0.93865800  | -1.07214500 |
| C  | 2.99020400  | 2.92920800  | -0.77947100 |
| H  | 5.06189000  | 2.63512800  | -0.23946500 |
| C  | 1.52469200  | -1.91061200 | -1.39242000 |
| C  | 0.31043500  | 0.27971200  | -1.29934300 |
| C  | 1.77222900  | 2.33041000  | -1.07127900 |
| H  | 3.06848800  | 4.01211100  | -0.79294500 |
| C  | 0.41280800  | -1.16622300 | -1.59261900 |
| H  | 1.51534200  | -2.97724500 | -1.57591900 |
| H  | -0.20390000 | 0.75718300  | -2.14351900 |
| H  | 0.90604400  | 2.93963400  | -1.30126600 |
| H  | -0.49100200 | -1.65523900 | -1.94664800 |
| H  | 4.88965900  | 0.16563600  | -0.27278500 |
| O  | 3.75770500  | -1.93341300 | -0.54472500 |
| Cl | -3.00814900 | -0.32298100 | -2.29080900 |
| Cl | -3.53700300 | -2.27334400 | 0.87401700  |
| C  | 3.80689100  | -3.37683500 | -0.59795100 |
| H  | 4.79752000  | -3.63272300 | -0.22893200 |
| H  | 3.03863500  | -3.79524300 | 0.05470600  |
| H  | 3.68676600  | -3.71651200 | -1.62814300 |

Structure and coordinates of 4-Int-o2.log

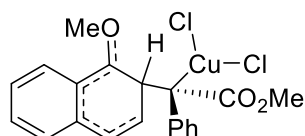

|   |            |            |            |
|---|------------|------------|------------|
| C | 1.15401700 | 1.43214800 | 2.69476700 |
| C | 0.34338400 | 0.72045600 | 1.81269900 |

|    |             |             |             |
|----|-------------|-------------|-------------|
| C  | -0.01177300 | 1.25254000  | 0.56707800  |
| C  | 0.46974300  | 2.52596800  | 0.23211900  |
| C  | 1.27989500  | 3.24107600  | 1.11103800  |
| C  | 1.62830400  | 2.69523900  | 2.34611300  |
| H  | 1.40875600  | 0.99763900  | 3.65697700  |
| H  | -0.02863000 | -0.25736400 | 2.10383900  |
| H  | 0.21821700  | 2.96358000  | -0.72979600 |
| H  | 1.64178400  | 4.22510700  | 0.82728200  |
| H  | 2.25983000  | 3.25281100  | 3.03144400  |
| C  | -1.75644500 | 1.16453200  | -1.29504300 |
| O  | -1.99814000 | 0.92612200  | -2.46805600 |
| O  | -2.41391300 | 2.10246400  | -0.59995000 |
| C  | -3.46544300 | 2.78521100  | -1.28984800 |
| H  | -3.87204300 | 3.49492000  | -0.57002200 |
| H  | -3.07472100 | 3.31371200  | -2.16283300 |
| H  | -4.23841600 | 2.07879600  | -1.60223500 |
| C  | -0.76546700 | 0.42781800  | -0.45498500 |
| Cu | -2.12121000 | -0.88264700 | 0.38303100  |
| C  | 3.38317600  | -1.37926700 | 0.67842800  |
| C  | 2.54667800  | -0.87984400 | -0.35412100 |
| C  | 4.71383700  | -1.02459100 | 0.73958600  |
| C  | 1.15418000  | -1.18391800 | -0.47613000 |
| C  | 3.09564100  | 0.03614500  | -1.30306200 |
| C  | 5.25768900  | -0.17129600 | -0.23112700 |
| H  | 5.33568900  | -1.40381500 | 1.54295200  |
| C  | 0.23592200  | -0.38646900 | -1.35748300 |
| C  | 2.27080500  | 0.66036600  | -2.32044300 |
| C  | 4.45799500  | 0.35259300  | -1.23229800 |
| H  | 6.30982100  | 0.09249300  | -0.18746400 |
| C  | 0.94510100  | 0.49029800  | -2.33543800 |
| H  | -0.36812100 | -1.11250600 | -1.91797000 |
| H  | 2.76287900  | 1.30463800  | -3.04267600 |
| H  | 4.87493100  | 1.03443800  | -1.96666700 |
| H  | 0.32004300  | 0.99289400  | -3.06410600 |
| H  | 2.99247500  | -2.00922100 | 1.46242700  |
| Cl | -2.56161600 | -2.47064200 | -1.11732700 |
| Cl | -3.00312300 | -0.33185400 | 2.33883700  |
| O  | 0.50677400  | -2.11753200 | 0.12512400  |
| C  | 0.99346800  | -3.19764600 | 0.94744900  |
| H  | 0.18264100  | -3.92348500 | 0.93420400  |
| H  | 1.89728700  | -3.62699600 | 0.51470800  |
| H  | 1.15122800  | -2.83502800 | 1.96363200  |

Structure and coordinates of 4-TS-p3.log

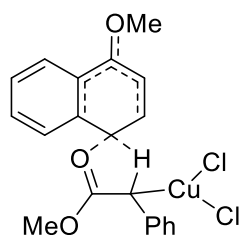

|    |             |             |             |
|----|-------------|-------------|-------------|
| C  | 0.71950300  | 2.06616800  | -2.76097500 |
| C  | 0.33083500  | 1.21761300  | -1.73526300 |
| C  | 1.00783200  | 1.21636200  | -0.49052000 |
| C  | 2.09269300  | 2.11235500  | -0.32949500 |
| C  | 2.46861800  | 2.96046000  | -1.36261200 |
| C  | 1.78977700  | 2.94378900  | -2.58213500 |
| H  | 0.18725700  | 2.03993600  | -3.70662500 |
| H  | -0.49814900 | 0.53577000  | -1.89692200 |
| H  | 2.63774500  | 2.13816600  | 0.60506300  |
| H  | 3.30236200  | 3.63986600  | -1.21435600 |
| H  | 2.09397600  | 3.60713300  | -3.38565600 |
| C  | 0.95510300  | 0.30186000  | 1.95944700  |
| O  | 0.17732600  | -0.26169100 | 2.76799900  |
| O  | 2.06068200  | 0.87955800  | 2.34687600  |
| C  | 2.41827300  | 0.76471900  | 3.74098700  |
| H  | 3.36298700  | 1.29699100  | 3.83444600  |
| H  | 1.65233100  | 1.22835900  | 4.36473200  |
| H  | 2.54352600  | -0.28738100 | 4.00141000  |
| C  | 0.57911900  | 0.25611500  | 0.54388800  |
| Cu | 1.95627200  | -0.96365000 | -0.38191900 |
| H  | -0.71268900 | -0.57376900 | 1.78552200  |
| C  | -0.84776000 | -0.29075300 | 0.51234300  |
| C  | -1.96750400 | 0.66134800  | 0.50349500  |
| C  | -1.10273600 | -1.58709600 | -0.00695900 |
| C  | -1.81595900 | 1.99369200  | 0.94038600  |
| C  | -3.25100200 | 0.23435500  | 0.08713700  |
| C  | -2.35685400 | -2.01963100 | -0.39511200 |
| H  | -0.27490400 | -2.29055900 | -0.05219400 |
| C  | -2.89059700 | 2.85820400  | 0.95598800  |
| H  | -0.84333600 | 2.35037100  | 1.26218500  |
| C  | -4.34362800 | 1.13287000  | 0.11200600  |
| C  | -3.42678700 | -1.12270300 | -0.36515600 |
| H  | -2.48947000 | -3.03970100 | -0.73085600 |
| C  | -4.16475200 | 2.42877900  | 0.53920800  |
| H  | -2.75001600 | 3.88127100  | 1.29101900  |
| H  | -5.32067600 | 0.78854800  | -0.20729600 |
| H  | -5.00171200 | 3.11924700  | 0.55588300  |
| O  | -4.65345900 | -1.43709900 | -0.73653100 |

|    |             |             |             |
|----|-------------|-------------|-------------|
| Cl | 3.15353800  | -1.34686800 | -2.24380400 |
| Cl | 2.27976300  | -2.58777400 | 1.15306700  |
| C  | -4.94928000 | -2.76261300 | -1.19663400 |
| H  | -4.74472600 | -3.49397400 | -0.41039400 |
| H  | -6.01338300 | -2.75381300 | -1.42687100 |
| H  | -4.37486800 | -2.99318500 | -2.09782000 |

Structure and coordinates of 4-TS-o3.log

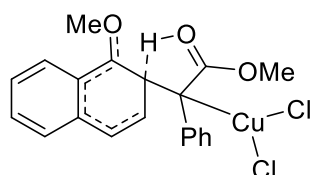

|   |             |             |             |
|---|-------------|-------------|-------------|
| C | 1.23889700  | 3.37125300  | -1.45678700 |
| C | 0.63696500  | 2.32583300  | -0.76933300 |
| C | 1.38188900  | 1.50313800  | 0.10541100  |
| C | 2.76414300  | 1.76852500  | 0.24228700  |
| C | 3.35652900  | 2.81778700  | -0.45059900 |
| C | 2.60207900  | 3.62514000  | -1.30187900 |
| H | 0.64038600  | 3.98654000  | -2.12162500 |
| H | -0.42151200 | 2.13838700  | -0.92014100 |
| H | 3.37344900  | 1.14702300  | 0.88543800  |
| H | 4.41983500  | 2.99993200  | -0.32772100 |
| H | 3.07244000  | 4.44073500  | -1.84233500 |
| C | 1.16546000  | -0.29370900 | 1.99677500  |
| O | 0.30698700  | -0.91546100 | 2.66502700  |
| O | 2.41709200  | -0.21970600 | 2.36433300  |
| C | 2.81725300  | -0.98828800 | 3.51593600  |
| H | 3.88581900  | -0.80848100 | 3.61968200  |
| H | 2.28384500  | -0.64152900 | 4.40284600  |
| H | 2.62177400  | -2.04689300 | 3.33856000  |
| C | 0.71330200  | 0.35465000  | 0.75813300  |
| C | -3.94117000 | -0.80843200 | -0.97545300 |
| C | -3.06066100 | -0.13403000 | -0.08648700 |
| C | -5.28650300 | -0.52359200 | -0.98681000 |
| C | -1.64429300 | -0.36710500 | -0.04195600 |
| C | -3.59352900 | 0.89553700  | 0.74894100  |
| C | -5.81560800 | 0.44889600  | -0.11638800 |
| H | -5.94073200 | -1.05124200 | -1.67266800 |
| C | -0.81183700 | 0.36972800  | 0.86459900  |
| C | -2.73897100 | 1.70456200  | 1.56966900  |
| C | -4.98241500 | 1.14988700  | 0.72557500  |
| H | -6.88089100 | 0.65763900  | -0.12431000 |
| C | -1.40698000 | 1.48995900  | 1.58632700  |



|    |             |             |             |
|----|-------------|-------------|-------------|
| H  | -0.74120200 | -0.47852000 | 1.82012900  |
| H  | -3.18406800 | 2.50535200  | 2.15136200  |
| H  | -5.37950400 | 1.92087200  | 1.37889800  |
| H  | -0.74593000 | 2.10317600  | 2.19139200  |
| H  | -3.57135600 | -1.54510800 | -1.67216600 |
| Cu | 1.42391500  | -0.81802000 | -0.76689100 |
| Cl | 1.92025200  | -2.81579600 | 0.18762900  |
| Cl | 1.86946800  | -0.77797200 | -2.96570800 |
| O  | -0.99343900 | -1.23572800 | -0.78882000 |
| C  | -1.45830500 | -2.53905700 | -1.20436800 |
| H  | -1.83659300 | -2.48314100 | -2.22521300 |
| H  | -0.56916700 | -3.16847700 | -1.17283000 |
| H  | -2.20793300 | -2.91657500 | -0.50802100 |

Structure and coordinates of 4-Int-p4.log

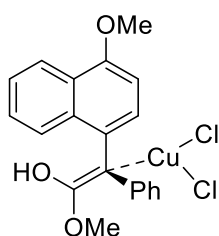

|    |             |             |             |
|----|-------------|-------------|-------------|
| C  | 1.38485500  | 3.14838500  | -1.39966600 |
| C  | 0.71407100  | 2.07618300  | -0.82785100 |
| C  | 1.21063300  | 1.42892900  | 0.33319100  |
| C  | 2.42585700  | 1.91266600  | 0.88530600  |
| C  | 3.08335000  | 2.98673100  | 0.30342900  |
| C  | 2.57087100  | 3.61027700  | -0.83731900 |
| H  | 0.97955300  | 3.61458800  | -2.29163500 |
| H  | -0.21024300 | 1.73058700  | -1.27722500 |
| H  | 2.84481700  | 1.45368800  | 1.76980200  |
| H  | 4.00713900  | 3.34429900  | 0.74717800  |
| H  | 3.09695600  | 4.44860500  | -1.28289300 |
| C  | 0.42985700  | 0.27205300  | 0.84783500  |
| C  | 0.82173700  | -0.51569500 | 1.95746500  |
| O  | 0.01291400  | -1.38516800 | 2.51220700  |
| O  | 2.00167400  | -0.44176700 | 2.48823100  |
| C  | 2.40036200  | -1.39894500 | 3.49863100  |
| H  | 3.44433900  | -1.16736900 | 3.69753100  |
| H  | 1.79696600  | -1.26249800 | 4.39698100  |
| H  | 2.30050700  | -2.40984700 | 3.10300800  |
| Cu | 1.76311300  | -0.48831600 | -0.69644900 |
| Cl | 2.81773200  | -0.15628700 | -2.63374200 |
| Cl | 2.28063200  | -2.59238900 | -0.01400400 |
| C  | -3.11989700 | 1.59292900  | 0.95916800  |

|   |             |             |             |
|---|-------------|-------------|-------------|
| C | -3.84533700 | 0.69565600  | 0.20634400  |
| C | -3.20374200 | -0.45058900 | -0.36625600 |
| C | -1.80573300 | -0.65304100 | -0.16139700 |
| C | -1.06184600 | 0.31286800  | 0.60019700  |
| C | -1.73832600 | 1.38726800  | 1.13971600  |
| H | -5.00570300 | -1.20891000 | -1.28611700 |
| C | -3.94653600 | -1.38336800 | -1.13472400 |
| C | -1.22105600 | -1.82033100 | -0.72347000 |
| H | -1.18383400 | 2.12449000  | 1.71408800  |
| C | -1.96243500 | -2.70970300 | -1.46370100 |
| C | -3.33967700 | -2.48881700 | -1.67978200 |
| H | -0.17280200 | -2.03720900 | -0.54936200 |
| H | -1.48236600 | -3.59012900 | -1.88009700 |
| H | -3.91790700 | -3.19381400 | -2.26891600 |
| O | -5.16386700 | 0.80203300  | -0.04712500 |
| H | -0.87261300 | -1.34606700 | 2.10863200  |
| H | -3.58341300 | 2.46286300  | 1.40798700  |
| C | -5.87062400 | 1.91957600  | 0.47590500  |
| H | -5.46760900 | 2.85861600  | 0.08102400  |
| H | -6.90148400 | 1.79873700  | 0.14316100  |
| H | -5.83882700 | 1.92906200  | 1.57092300  |

Structure and coordinates of 4-Int-o4.log

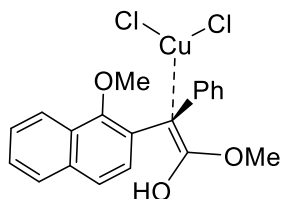

|    |             |             |             |
|----|-------------|-------------|-------------|
| C  | 1.85060600  | 3.84853600  | 0.64464300  |
| C  | 1.30166100  | 2.62453300  | 1.01688800  |
| C  | 1.57383400  | 1.47225200  | 0.27323400  |
| C  | 2.42233600  | 1.55626600  | -0.83166700 |
| C  | 2.97192400  | 2.78094800  | -1.20520600 |
| C  | 2.68486500  | 3.93097100  | -0.47119800 |
| H  | 1.62468400  | 4.73949400  | 1.22328600  |
| H  | 0.64151600  | 2.56452700  | 1.87823300  |
| H  | 2.65286100  | 0.65866700  | -1.39757300 |
| H  | 3.62601700  | 2.83369600  | -2.07073500 |
| H  | 3.11149600  | 4.88580300  | -0.76410000 |
| C  | 0.98150600  | 0.16276800  | 0.72306800  |
| C  | 1.90979700  | -0.68231600 | 1.38179100  |
| Cu | 0.47501200  | -1.36287100 | -0.73693400 |
| Cl | 2.47517300  | -2.12521700 | -1.43533500 |
| Cl | -1.16601400 | -2.59196100 | -1.62981600 |

|   |             |             |             |
|---|-------------|-------------|-------------|
| C | -0.48794700 | 0.03002300  | 0.86866000  |
| C | -1.36516400 | 0.79940300  | 0.06617000  |
| C | -2.78233800 | 0.68743200  | 0.19649600  |
| C | -3.33194100 | -0.21192900 | 1.14669700  |
| C | -2.44527500 | -0.95516000 | 1.97612300  |
| C | -1.09577200 | -0.83470200 | 1.85114100  |
| H | -3.24129400 | 2.17331200  | -1.31714900 |
| C | -3.65703600 | 1.46908700  | -0.60526400 |
| C | -4.73830100 | -0.32430000 | 1.26101900  |
| H | -2.86000200 | -1.62103100 | 2.72708400  |
| H | -0.46381500 | -1.40289200 | 2.51660100  |
| C | -5.56571600 | 0.43244100  | 0.46342600  |
| C | -5.01933200 | 1.33908100  | -0.47413100 |
| H | -5.15061800 | -1.01661800 | 1.98965000  |
| H | -6.64341900 | 0.33891200  | 0.55634200  |
| H | -5.68117200 | 1.93809000  | -1.09188300 |
| O | 1.54575400  | -1.81238100 | 1.94626200  |
| H | 2.28709600  | -2.38467900 | 2.20347400  |
| O | 3.15810900  | -0.31111500 | 1.40303300  |
| C | 4.18956400  | -1.18532400 | 1.90115600  |
| H | 5.11801000  | -0.64203600 | 1.74091700  |
| H | 4.05102200  | -1.36343500 | 2.97115100  |
| H | 4.21208000  | -2.11615000 | 1.32789500  |
| O | -0.91118500 | 1.73322300  | -0.80652800 |
| C | -0.69263100 | 1.31878000  | -2.15751900 |
| H | 0.19589500  | 0.67857900  | -2.22795800 |
| H | -1.56393500 | 0.78888500  | -2.55438500 |
| H | -0.51672800 | 2.23162800  | -2.72747700 |

Structure and coordinates of 4-Int-p5\*.log

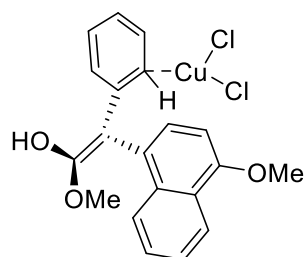

|   |             |             |            |
|---|-------------|-------------|------------|
| C | -1.13593900 | -1.44489900 | 2.71226400 |
| C | -0.24781300 | -0.63206600 | 2.03174700 |
| C | -0.68011200 | 0.51446500  | 1.30266800 |
| C | -2.09097300 | 0.82027900  | 1.34150900 |
| C | -2.97473800 | -0.00519400 | 2.05320900 |
| C | -2.50321400 | -1.15487500 | 2.71340500 |
| H | -0.76580600 | -2.31585800 | 3.24248400 |

|    |             |             |             |
|----|-------------|-------------|-------------|
| H  | 0.80800300  | -0.87635700 | 2.04797900  |
| H  | -2.45301500 | 1.76584700  | 0.96657000  |
| H  | -4.01357400 | 0.29087000  | 2.16498900  |
| H  | -3.20125400 | -1.79857700 | 3.23783000  |
| C  | 0.27886000  | 1.21498400  | 0.51734800  |
| C  | -0.03319000 | 2.36247800  | -0.25437000 |
| O  | 0.81277400  | 2.71056600  | -1.19169500 |
| O  | -1.09178500 | 3.07351800  | -0.00959800 |
| C  | -1.55002500 | 4.08440700  | -0.93346100 |
| H  | -2.51743200 | 4.39784200  | -0.54750400 |
| H  | -0.86357100 | 4.93534300  | -0.93090000 |
| H  | -1.67230600 | 3.64628000  | -1.92715800 |
| Cu | -2.97552200 | -0.47562200 | -0.12039700 |
| Cl | -4.33714300 | -2.24875600 | -0.45624100 |
| Cl | -2.27051600 | 0.61397600  | -1.99748700 |
| C  | 4.03385500  | 0.91885000  | 0.98820400  |
| C  | 4.34822400  | -0.20588400 | 0.25812000  |
| C  | 3.32587700  | -0.91830100 | -0.45277100 |
| C  | 1.98417700  | -0.45004800 | -0.39400000 |
| C  | 1.67814800  | 0.71112500  | 0.39020000  |
| C  | 2.69387300  | 1.36499900  | 1.04447000  |
| H  | 4.65473300  | -2.42688700 | -1.25198700 |
| C  | 3.62922100  | -2.07636900 | -1.21474100 |
| C  | 0.98911100  | -1.15531700 | -1.12264500 |
| H  | 2.46687200  | 2.24900600  | 1.63474200  |
| C  | 1.30794100  | -2.27394800 | -1.85407800 |
| C  | 2.64015000  | -2.74369800 | -1.89768400 |
| H  | -0.03422700 | -0.79234200 | -1.11364900 |
| H  | 0.53084300  | -2.79575300 | -2.40467900 |
| H  | 2.88209900  | -3.63023900 | -2.47619200 |
| O  | 5.59015000  | -0.72234100 | 0.14569200  |
| H  | 4.79217700  | 1.47019700  | 1.53074400  |
| C  | 6.65987400  | -0.06477900 | 0.81055300  |
| H  | 6.49949300  | -0.04718800 | 1.89433300  |
| H  | 7.55323800  | -0.64763700 | 0.58524300  |
| H  | 6.78818700  | 0.95699700  | 0.43607600  |
| H  | 0.55691800  | 3.51157300  | -1.67889600 |

Structure and coordinates of 4-Int-o5\*.log

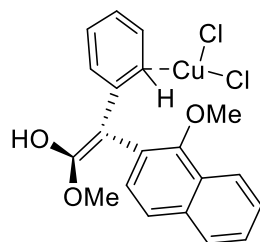

|    |             |             |             |
|----|-------------|-------------|-------------|
| C  | 3.06798200  | -0.79788400 | -1.81486000 |
| C  | 2.14045900  | 0.20090900  | -1.47640400 |
| C  | 0.75112800  | -0.13673700 | -1.27319000 |
| C  | 0.40085500  | -1.51757300 | -1.38691800 |
| C  | 1.33374200  | -2.48904200 | -1.69171400 |
| C  | 2.67306400  | -2.14406400 | -1.90393700 |
| H  | 4.08187600  | -0.51571800 | -2.08353700 |
| H  | 2.44016300  | 1.23461200  | -1.55904500 |
| H  | -0.62660100 | -1.81519700 | -1.21428500 |
| H  | 1.02539800  | -3.52698900 | -1.75735700 |
| H  | 3.40758000  | -2.90619900 | -2.13960900 |
| C  | -4.28566900 | -0.43797100 | 1.76614100  |
| C  | -3.64645400 | -0.27117400 | 0.50854200  |
| C  | -5.59293500 | -0.85568400 | 1.83004700  |
| C  | -2.28847100 | 0.15622500  | 0.40554000  |
| C  | -4.37424500 | -0.53443100 | -0.68588000 |
| C  | -6.31937500 | -1.12478300 | 0.64371200  |
| H  | -6.07653600 | -0.97948400 | 2.79432900  |
| C  | -1.69043300 | 0.33154600  | -0.82358700 |
| C  | -3.73645000 | -0.35206600 | -1.94307200 |
| C  | -5.72517600 | -0.96464600 | -0.58398800 |
| H  | -7.35213800 | -1.45377000 | 0.71047900  |
| C  | -2.43520200 | 0.07106700  | -2.00661600 |
| H  | -4.29408800 | -0.55048100 | -2.85401600 |
| H  | -6.27951300 | -1.16327000 | -1.49747100 |
| H  | -1.95080500 | 0.21093100  | -2.96880500 |
| H  | -3.73013700 | -0.22264600 | 2.67309600  |
| Cu | 3.12452400  | -0.37701700 | 0.35596900  |
| Cl | 4.40890200  | -1.99290700 | 1.30690100  |
| Cl | 2.47905900  | 1.27790700  | 1.76049300  |
| C  | -0.27370700 | 0.78929100  | -0.93192600 |
| C  | -0.05366100 | 2.16004400  | -0.66329600 |
| O  | -1.07410000 | 2.86393700  | -0.23590800 |
| O  | 1.10283600  | 2.71361600  | -0.86437600 |
| C  | 1.39882400  | 4.04762600  | -0.40163800 |
| H  | 2.46371800  | 4.17515100  | -0.58101100 |
| H  | 0.83909700  | 4.78308900  | -0.98679200 |
| H  | 1.19741700  | 4.12762100  | 0.66911900  |

|   |             |             |             |
|---|-------------|-------------|-------------|
| H | -0.87140600 | 3.80143200  | -0.08199200 |
| O | -1.59679900 | 0.43280000  | 1.55168200  |
| C | -0.89486400 | -0.68387000 | 2.10397300  |
| H | -0.10899800 | -1.02839700 | 1.42339700  |
| H | -0.43972900 | -0.33577400 | 3.03123100  |
| H | -1.58381600 | -1.50994100 | 2.31670500  |
